# Supplementary material for: Design, synthesis, and biological evaluation of oxazolidone derivatives as highly potent N-acylethanolamine acid amidase (NAAA) inhibitors
Source: Royal Society of Chemistry journal article supplement (doi:10.1039/c6ra28734d), 2017-01-01
Supplement: c6ra28734d1.pdf [file c6ra28734d1.pdf]

**Design, synthesis, and biological evaluation of oxazolidone derivatives as highly potent *N*-Acylethanolamine acid amidase (NAAA) inhibitors**

Jie Ren<sup>a</sup>, Yuhang Li<sup>a,b\*</sup>, Hongwei Ke<sup>c</sup>, Yanting Li<sup>a</sup>, Longhe Yang<sup>d</sup>, Helin Yu<sup>a</sup>, Rui Huang<sup>a</sup>, Canzhong Lu<sup>b</sup>, Yan Qiu<sup>a\*</sup>

*a* Medical College, Xiamen University, Xiamen, Fujian 361102, P. R. China;

*b* Xiamen Institute of Rare-earth Materials, Haixi Institutes, Chinese Academy of Sciences, Fujian 361005, P. R. China;

*c* College of Ocean and Earth Science, Xiamen University, Xiamen, Fujian, 361005, P. R. China;

*d* Engineering Research Center of Marine Biological Resource Comprehensive Utilization, Third Institute of Oceanography, State Oceanic Administration, Xiamen 361005, P. R. China;

Corresponding authors:

Yuhang Li, Xiamen Institute of Rare-earth Materials, Haixi Institutes, Chinese Academy of Sciences, Fujian 361005, P. R. China. Email: yuhangli@fjirsm.ac.cn

Y Qiu, Medical College, Xiamen University, 361102 Xiamen, Fujian, P. R. China. Email: yanqiu@xmu.edu.cn.

## Supplemental Experimental Procedures

### Supplementary Tables

- **Table S1** Inhibitory activities of compounds **1k–1u** towards NAAA and FAAH
- **Table S2** Inhibitory activities of compounds **3k–3s** towards NAAA and FAAH
- **Table S3** Purity of the new synthesized compounds

### Supplementary Figures

- **Figure S1** Characterization of **2f** as a reversible and noncompetitive NAAA inhibitor
- **Figure S2** Effects of NAAA inhibitor on body weight and food intake
- **Figure S3** Assessment of gastric mucosa injury caused by NAAA and COX inhibitors
- **Figure S4** The inhibition of hERG channels by **2f** and cisapride in CHO cells
- **Figure S5**  $^1\text{H}$  and  $^{13}\text{C}$  NMR spectra of compounds

### Reference

## Supplemental Experimental Procedures

### 1–Pentadecanyl–carbonyl pyrrolidine (1a)

Following the **General Procedure A** (eluent: EtOAc/PE 1: 5), the amidation of palmitoyl chloride with pyrrolidine afford **1a** (83 mg; yield: 89%) as white crystals: mp 84.0–84.6 °C; IR (film) $\nu_{\text{max}}$ : 2923, 2852, 1648, 1426  $\text{cm}^{-1}$ ;  $^1\text{H}$  NMR (400 MHz,  $\text{CDCl}_3$ )  $\delta$  0.88 (t,  $J = 7.2$  Hz, 3 H), 1.25–1.30 (m, 24 H), 1.60–1.67 (m, 2 H), 1.81–1.88 (m, 2 H), 1.91–1.98 (m, 2 H), 2.25 (t,  $J = 8$  Hz, 2 H), 3.39–3.47 (m, 4 H) ppm;  $^{13}\text{C}$  NMR (100 MHz,  $\text{CDCl}_3$ )  $\delta$  14.1, 22.6, 24.4, 24.9, 26.1, 29.3, 29.43, 29.49, 29.52, 29.62, 29.64, 31.9, 34.8, 45.5, 46.6, 171.8 ppm; MS (ESI,  $m/z$ ): 310 ( $M + H$ ) $^+$ .

### (R)–tert–butyl 1–palmitoylpyrrolidin–3–ylcarbamate (1c–1)

Following the **General Procedure A** (eluent: EtOAc/PE 1: 3), the amidation of palmitoyl chloride with (R)–tert–butyl pyrrolidin–3–ylcarbamate afford **1c–1** (108 mg; yield: 85%) as white crystals: mp: 47.3–49.0 °C;  $[\alpha]_{\text{D}}^{20}$  41 (c 0.5,  $\text{CHCl}_3$ ); IR (film) $\nu_{\text{max}}$ : 3329, 2955, 2918, 2849, 1684, 1631, 1566, 1541, 1446, 1309, 1249  $\text{cm}^{-1}$ ;  $^1\text{H}$  NMR (400 MHz,  $\text{CDCl}_3$ )  $\delta$  0.88 (t,  $J = 7.2$  Hz, 3 H), 1.25–1.30 (m, 24 H), 1.45 (s, 9 H), 1.58–1.65 (m, 2 H), 1.76–1.98 (m, 1 H), 2.10–2.26 (m, 3 H), 3.27–3.37 (m, 1 H), 3.47–3.58 (m, 2 H), 3.65–3.73 (m, 1 H), 4.22 (br, 1 H), 4.74–4.82 (m, 1 H) ppm;  $^{13}\text{C}$  NMR (100 MHz,  $\text{CDCl}_3$ )  $\delta$  14.1, 22.6, 24.8, 24.9, 28.3, 29.3, 29.4, 29.5, 29.6, 30.3, 31.9, 32.4, 34.3, 34.8, 43.6, 44.6, 49.3, 50.8, 51.1, 52.6, 79.9, 155.2, 155.3, 172.1 ppm; MS (ESI,  $m/z$ ): 425 ( $M + H$ ) $^+$ ; Anal. calcd for  $\text{C}_{25}\text{H}_{48}\text{N}_2\text{O}_3$ : C, 70.71; H, 11.39; N, 6.60; Found: C, 70.97; H, 11.41; N, 6.58.

### (R)–1–(3–aminopyrrolidin–1–yl)hexadecan–1–one (1c)

Following the **General Procedure C** (eluent: MeOH:  $\text{CH}_2\text{Cl}_2 = 1:15$ ), the reaction of **1c–1** afford **1c** (41 mg, 90%) as white crystals, mp: 39.6–41.1 °C;  $[\alpha]_{\text{D}}^{20} -12.5$  (c 0.2,  $\text{CH}_3\text{OH}$ ); IR (film) $\nu_{\text{max}}$ : 3120, 2923, 2857, 1634, 1454, 1371, 1329, 1222, 1190, 1108  $\text{cm}^{-1}$ ;  $^1\text{H}$  NMR (400 MHz,  $\text{CD}_3\text{OD}$ )  $\delta$  0.94 (t,  $J = 6.4$  Hz, 3 H), 1.33–1.37 (m, 24 H), 1.62–1.67 (m, 2 H), 1.95–2.08 (m, 1 H), 2.22–2.39 (m, 3 H), 3.43–3.82 (m, 5 H) ppm;  $^{13}\text{C}$  NMR (100 MHz,  $\text{CD}_3\text{OD}$ )  $\delta$  13.1, 22.3, 24.5, 24.6, 29.1, 29.2, 29.3, 29.4, 30.1, 31.2, 31.7, 33.7, 34.1, 43.5, 44.4, 49.1, 50.6, 50.7, 51.9, 173.0, 173.3 ppm; MS (ESI,  $m/z$ ): 325 ( $M + H$ ) $^+$ ; Anal. calcd for  $\text{C}_{20}\text{H}_{40}\text{N}_2\text{O}$ : C, 74.02; H, 12.42; N, 8.63; Found: C, 74.06; H, 12.45; N, 8.62.

### (S)–tert–butyl 1–palmitoylpyrrolidin–3–ylcarbamate (1d–1)

Following the **General Procedure A** (eluent: EtOAc/PE 1: 3), the amidation of palmitoyl chloride with (S)–tert–butyl pyrrolidin–3–ylcarbamate afford **1d–1** (117 mg; yield: 92%) as white crystals, mp: 42.0–43.0 °C;  $[\alpha]_{\text{D}}^{20} -39$  (c 0.4,  $\text{CHCl}_3$ ); IR (film) $\nu_{\text{max}}$ : 3330, 2955, 2918, 2850, 1684, 1630, 1566, 1541, 1446, 1309, 1249  $\text{cm}^{-1}$ ;  $^1\text{H}$  NMR (400 MHz,  $\text{CDCl}_3$ )  $\delta$  0.88 (t,  $J = 7.2$  Hz, 3 H), 1.25–1.30 (m, 24 H), 1.45 (s, 9 H), 1.58–1.65 (m, 2 H), 1.76–1.98 (m, 1 H), 2.10–2.26 (m, 3 H), 3.27–3.37 (m, 1 H), 3.47–3.58 (m, 2 H), 3.65–3.73 (m, 1 H), 4.22 (br, 1 H), 4.74–4.82 (m, 1 H) ppm;  $^{13}\text{C}$  NMR (100 MHz,  $\text{CDCl}_3$ )  $\delta$  14.1, 22.6, 24.8, 24.9, 28.3, 29.3, 29.4, 29.5, 29.6, 30.3, 31.9, 32.4, 34.3, 34.8, 43.6, 44.6, 49.3, 50.8, 51.1, 52.6, 79.9, 155.2, 155.3, 172.1 ppm; MS (ESI,  $m/z$ ): 425 ( $M + H$ ) $^+$ ; Anal. calcd for  $\text{C}_{25}\text{H}_{48}\text{N}_2\text{O}_3$ : C, 70.71; H, 11.39; N, 6.60; Found: C, 70.99; H, 11.40; N, 6.59.

**(S)-1-(3-aminopyrrolidin-1-yl)hexadecan-1-one (1d)**

Following the **General Procedure C** (eluent: MeOH: CH<sub>2</sub>Cl<sub>2</sub> = 1:15), the reaction of **1d-1** with CF<sub>3</sub>COOH afford **1d** (34 mg, 74%) as white wax; [ $\alpha$ ]<sub>D</sub><sup>20</sup> 12.5 (c 0.1, CH<sub>3</sub>OH); IR (film) $\nu_{\max}$ : 3120, 2923, 2857, 1634, 1454, 1371, 1329, 1222, 1190, 1108 cm<sup>-1</sup>; <sup>1</sup>H NMR (400 MHz, CD<sub>3</sub>OD)  $\delta$  0.94 (t, J = 6.4 Hz, 3 H), 1.33–1.37 (m, 24 H), 1.62–1.67 (m, 2 H), 1.95–2.08 (m, 1 H), 2.22–2.39 (m, 3 H), 3.43–3.82 (m, 5 H) ppm; <sup>13</sup>C NMR (100 MHz, CD<sub>3</sub>OD)  $\delta$  13.0, 22.3, 24.5, 24.6, 29.1, 29.2, 29.3, 29.4, 30.1, 31.2, 31.7, 33.7, 34.1, 43.5, 44.4, 49.1, 50.6, 50.7, 51.9, 173.0, 173.3 ppm; MS (ESI, m/z): 325 (M + H)<sup>+</sup>; Anal. calcd for C<sub>20</sub>H<sub>40</sub>N<sub>2</sub>O: C, 74.02; H, 12.42; N, 8.63; Found: C, 74.02; H, 12.43; N, 8.64.

**(R)-1-(2-methylpyrrolidin-1-yl)hexadecan-1-one (1e)**

Following the **General Procedure D** (eluent: EtOAc/PE 1: 5), the reaction starting from **1q** afford **1e** (35 mg, 52%) as white wax; [ $\alpha$ ]<sub>D</sub><sup>20</sup> -27.9 (c 0.1, CDCl<sub>3</sub>); IR (film) $\nu_{\max}$ : 2956, 2921, 2850, 1649, 1460, 1418 cm<sup>-1</sup>; <sup>1</sup>H NMR (400 MHz, CDCl<sub>3</sub>)  $\delta$  0.88 (t, J = 7.2 Hz, 3 H), 1.18 (d, J = 6.3 Hz, 3 H), 1.25–1.30 (m, 24 H), 1.55–1.70 (m, 3 H), 1.84–2.07 (m, 3 H), 2.20–2.33 (m, 2 H), 3.34–3.50 (m, 2 H), 3.96–4.24 (m, 1 H) ppm; <sup>13</sup>C NMR (100 MHz, CDCl<sub>3</sub>)  $\delta$  14.0, 19.5, 21.2, 21.8, 22.6, 23.9, 24.8, 25.5, 29.3, 29.4, 29.5, 29.6, 29.6, 31.9, 33.2, 34.2, 35.0, 45.3, 46.8, 52.5, 53.0, 171.5, 171.7 ppm; MS (ESI, m/z): 324 (M + H)<sup>+</sup>; Anal. calcd for C<sub>21</sub>H<sub>41</sub>NO: C, 77.95; H, 12.77; N, 4.33; Found: C, 77.93; H, 12.79; N, 4.34.

**(S)-1-(2-methylpyrrolidin-1-yl)hexadecan-1-one (1f)**

Following the **General Procedure D** (eluent: EtOAc/PE 1: 5), the reaction starting from **1r** afford compound **1f** (41 mg, 63%) as yellow wax; [ $\alpha$ ]<sub>D</sub><sup>20</sup> 27.9 (c 0.1, CDCl<sub>3</sub>); IR (film) $\nu_{\max}$ : 2949, 2919, 2850, 1620, 1578, 1544, 1466 cm<sup>-1</sup>; <sup>1</sup>H NMR (400 MHz, CDCl<sub>3</sub>)  $\delta$  0.88 (t, J = 7.2 Hz, 3 H), 1.18 (d, J = 6.3 Hz, 3 H), 1.25–1.30 (m, 24 H), 1.55–1.70 (m, 3 H), 1.84–2.07 (m, 3 H), 2.20–2.33 (m, 2 H), 3.34–3.50 (m, 2 H), 3.96–4.24 (m, 1 H) ppm; <sup>13</sup>C NMR (100 MHz, CDCl<sub>3</sub>)  $\delta$  14.0, 19.5, 21.2, 21.8, 22.6, 23.9, 24.8, 25.5, 29.3, 29.4, 29.5, 29.6, 29.6, 31.9, 33.2, 34.2, 35.0, 45.3, 46.8, 52.5, 53.0, 171.5, 171.7 ppm; MS (ESI, m/z): 324 (M + H)<sup>+</sup>; Anal. calcd for C<sub>21</sub>H<sub>41</sub>NO: C, 77.95; H, 12.77; N, 4.33; Found: C, 77.94; H, 12.79; N, 4.34.

**1-palmitoylpyrrolidin-2-one (1g)**

To a solution of pyrrolidin-2-one (44 mg, 0.5 mmol) in THF (5 mL) was added slowly a solution of 2.5 M n-BuLi (0.55 mmol, 0.2 mL hexane) under nitrogen atmosphere at -78°C. After being stirred at the same temperature for 10 min, a solution of palmitoyl chloride (151 mg, 0.55 mmol) in THF (2 mL) was slowly added. The reaction mixture was stirred at -78°C for 0.5 hours, and allowed to warm slowly to room temperature in 5 hours. The reaction was quenched with 1.0 mL a sat. aqueous solution of NH<sub>4</sub>Cl and extracted with EtOAc (3 × 5 mL). The combined organic layers were dried over anhydrous Na<sub>2</sub>SO<sub>4</sub>, filtered and concentrated under reduced pressure. The residue was purified by flash chromatography on silica gel (eluent: EtOAc/PE 1: 5) to afford **1g** (92 mg; yield: 57%) as white crystals, mp: 71.9–72.6 °C; IR (film) $\nu_{\max}$ : 2916, 2841, 1728, 1682, 1465, 1398, 1256 cm<sup>-1</sup>; <sup>1</sup>H NMR (400 MHz, CDCl<sub>3</sub>)  $\delta$  0.88 (t, J = 6.8 Hz, 3 H), 1.26–1.31 (m, 24 H), 1.59–1.66 (m, 2 H), 1.99–2.07 (m, 2 H), 2.59 (t, J = 8.0 Hz, 2 H), 2.88 (t, J = 8.0 Hz, 2 H), 3.80 (t, J = 8.0 Hz, 2 H) ppm; <sup>13</sup>C NMR (100 MHz, CDCl<sub>3</sub>)  $\delta$  14.0, 17.1, 22.5, 24.1, 29.1, 29.2, 29.3, 29.4, 29.5, 29.5, 29.5, 31.8, 33.6, 36.7, 45.3, 174.3, 175.1 ppm; MS (ESI, m/z): 324 (M + H)<sup>+</sup>; Anal. calcd for C<sub>20</sub>H<sub>37</sub>NO<sub>2</sub>: C, 74.25; H, 11.53; N, 4.33. Found: C, 75.44;

H, 11.47; N, 8.33.

### **1-palmitoylimidazolidin-2-one (1h)**

To a suspension of NaH (60% in mineral oil, 60 mg) in anhydrous THF (5 mL), was added slowly a solution of 2-Imidazolidinone hemihydrates (48 mg, 0.5 mmol) in THF (5 mL) under nitrogen atmosphere at  $-20^{\circ}\text{C}$ . After being stirred at the same temperature for 10 min, a solution of palmitoyl chloride (151 mg, 0.55 mmol) in THF (2 mL) was slowly added. The reaction mixture was stirred at  $-20^{\circ}\text{C}$  for 0.5 hours, and allowed to warm slowly to room temperature in 5 hours. The reaction was quenched with 1.0 mL a sat. aqueous solution of  $\text{NH}_4\text{Cl}$  and extracted with EtOAc ( $3 \times 5$  mL). The combined organic layers were dried over anhydrous  $\text{Na}_2\text{SO}_4$ , filtered and concentrated under reduced pressure. The residue was purified by flash chromatography on silica gel (eluent: EtOAc/PE 1: 2) to afford **1h** (71 mg; yield: 44%) as white crystals, mp:  $114.5\text{--}116.8^{\circ}\text{C}$ ; IR (film) $\nu_{\text{max}}$ : 3249, 2916, 2841, 1738, 1677  $\text{cm}^{-1}$ ;  $^1\text{H}$  NMR (400 MHz,  $\text{CDCl}_3$ )  $\delta$  0.88 (t,  $J = 6.8$  Hz, 3 H), 1.25–1.33 (m, 24 H), 1.61–1.68 (m, 2 H), 2.91 (t,  $J = 6.8$  Hz, 2 H), 3.48 (t,  $J = 8.0$  Hz, 2 H), 3.95 (t,  $J = 8.0$  Hz, 2 H), 5.28 (s, 1 H) ppm;  $^{13}\text{C}$  NMR (100 MHz,  $\text{CDCl}_3$ )  $\delta$  14.0, 22.7, 24.7, 29.2, 29.3, 29.4, 29.5, 29.7, 31.9, 35.2, 36.5, 42.3, 156.7, 174.0 ppm; MS (ESI,  $m/z$ ): 325 ( $\text{M} + \text{H}$ ) $^+$ ; Anal. calcd for  $\text{C}_{19}\text{H}_{36}\text{N}_2\text{O}_2$ : C, 70.32; H, 11.18; N, 8.63. Found: C, 70.52; H, 11.16; N, 8.64.

### **3-palmitoyloxazolidin-2-one (1i)**

Following the **General Procedure E** (eluent: EtOAc/PE 1: 5), the imidation of palmitoyl chloride with oxazolidin-2-one afford **1i** (83 mg; yield: 51%) as white crystals, mp:  $92.2\text{--}93.8^{\circ}\text{C}$ ; IR (film) $\nu_{\text{max}}$ : 2914, 2846, 1765, 1699, 1386  $\text{cm}^{-1}$ ;  $^1\text{H}$  NMR (400 MHz,  $\text{CDCl}_3$ )  $\delta$  0.88 (t,  $J = 7.2$  Hz, 3 H), 1.26–1.32 (m, 24 H), 1.62–1.69 (m, 2 H), 2.91 (t,  $J = 7.6$  Hz, 2 H), 4.02 (t,  $J = 8.0$  Hz, 2 H), 4.41 (t,  $J = 8.0$  Hz, 2 H) ppm;  $^{13}\text{C}$  NMR (100 MHz,  $\text{CDCl}_3$ )  $\delta$  14.0, 22.6, 24.2, 29.1, 29.3, 29.4, 29.5, 29.6, 29.6, 31.8, 35.0, 42.5, 61.9, 153.5, 173.5 ppm; MS (ESI,  $m/z$ ): 326 ( $\text{M} + \text{H}$ ) $^+$ ; Anal. calcd for  $\text{C}_{19}\text{H}_{35}\text{NO}_3$ : C, 70.11; H, 10.84; N, 4.30. Found: C, 70.13; H, 10.86; N, 4.32.

### **(R)-1-(3-hydroxypyrrolidin-1-yl)hexadecan-1-one (1j)**

Following the **General Procedure A** (eluent: EtOAc/PE 1: 2), the amidation of palmitoyl chloride with (R)-pyrrolidin-3-ol afford **1j** (64 mg; yield: 66%) as white crystals, mp:  $58.8\text{--}59.5^{\circ}\text{C}$ ;  $[\alpha]_{\text{D}}^{20} -10.3$  (c 0.7,  $\text{CHCl}_3$ ); IR (film) $\nu_{\text{max}}$ : 3380, 2923, 2847, 1622, 1462, 1377, 1338, 1226  $\text{cm}^{-1}$ ;  $^1\text{H}$  NMR (400 MHz,  $\text{CDCl}_3$ )  $\delta$  0.88 (t,  $J = 6.4$  Hz, 3 H), 1.26–1.30 (m, 24 H), 1.69–1.77 (m, 2 H), 1.93–1.98 (m, 1 H), 2.00–2.05 (m, 1 H), 2.19–2.28 (m, 2 H), 3.36–3.45 (m, 5 H), 4.49 (d,  $J = 20.8$  Hz, 1 H) ppm;  $^{13}\text{C}$  NMR (100 MHz,  $\text{CDCl}_3$ )  $\delta$  14.0, 22.6, 24.8, 29.2, 29.4, 29.4, 29.5, 29.6, 31.9, 32.9, 34.2, 34.6, 34.8, 43.5, 44.6, 54.1, 54.8, 69.2, 70.8, 172.3, 172.5 ppm; MS (ESI,  $m/z$ ): 326 ( $\text{M} + \text{H}$ ) $^+$ ; Anal. calcd for  $\text{C}_{20}\text{H}_{39}\text{NO}_2$ : C, 73.79; H, 12.08; N, 4.30; Found: C, 73.92; H, 12.11; N, 4.29.

### **(S)-1-(3-hydroxypyrrolidin-1-yl)hexadecan-1-one (1k)**

Following the **General Procedure A** (eluent: EtOAc/PE 1: 2), the amidation of palmitoyl chloride with (S)-pyrrolidin-3-ol afford **1k** (77 mg; yield: 79%) as white crystals, mp:  $51.5\text{--}53.8^{\circ}\text{C}$ ;  $[\alpha]_{\text{D}}^{20} 10.3$  (c 0.7,  $\text{CHCl}_3$ ); IR (film) $\nu_{\text{max}}$ : 3379, 2923, 2847, 1622, 1463, 1376, 1338, 1226  $\text{cm}^{-1}$ ;  $^1\text{H}$  NMR (400 MHz,  $\text{CDCl}_3$ )  $\delta$  0.88 (t,  $J = 6.4$  Hz, 3 H), 1.25–1.29 (m, 24 H), 1.62–1.66 (m, 2 H), 1.93–1.98 (m, 1 H), 2.00–2.05 (m, 1 H), 2.21–2.28 (m, 2 H), 3.41–3.68 (m, 5 H), 4.48 (d,  $J = 12.8$  Hz, 1 H) ppm;  $^{13}\text{C}$

NMR (100 MHz, CDCl<sub>3</sub>)  $\delta$  14.0, 22.6, 24.8, 29.3, 29.4, 29.4, 29.5, 29.6, 31.8, 32.9, 34.2, 34.6, 34.8, 43.5, 44.6, 54.2, 54.8, 69.3, 70.9, 172.3, 172.5 ppm; MS (ESI, m/z): 326 (M + H)<sup>+</sup>; Anal. calcd for C<sub>20</sub>H<sub>39</sub>NO<sub>2</sub>: C, 73.79; H, 12.08; N, 4.30; Found: C, 73.84; H, 12.10; N, 4.31.

#### **(R)-1-(3-methoxypyrrolidin-1-yl)hexadecan-1-one (1l)**

Following the **General Procedure B** (eluent: EtOAc/PE 1: 10), the reaction of **1j** with CH<sub>3</sub>I afford **1l** (17 mg; yield: 81%) as colorless oil;  $[\alpha]_D^{20}$  -45.1 (c 0.2, CHCl<sub>3</sub>); IR (film) $\nu_{\max}$ : 2950, 2919, 2850, 1646, 1459, 1429, 1371, 1102 cm<sup>-1</sup>; <sup>1</sup>H NMR (400 MHz, CDCl<sub>3</sub>)  $\delta$  0.88 (t, J = 6.8 Hz, 3 H), 1.25–1.29 (m, 24 H), 1.60–1.66 (m, 2 H), 1.85–2.09 (m, 2 H), 2.21–2.28 (m, 2 H), 3.33 (d, J = 8.0 Hz, 3 H), 3.42–3.69 (m, 4 H), 3.97 (dd, J = 26.0, 2.8 Hz, 1 H) ppm; <sup>13</sup>C NMR (100 MHz, CDCl<sub>3</sub>)  $\delta$  14.1, 22.6, 24.8, 29.3, 29.3, 29.4, 29.5, 29.6, 29.7, 31.5, 31.8, 34.6, 34.8, 43.4, 44.5, 50.2, 51.7, 56.4, 56.5, 78.4, 79.9, 171.9, 172.1 ppm; MS (ESI, m/z): 340 (M + H)<sup>+</sup>; Anal. calcd for C<sub>21</sub>H<sub>41</sub>NO<sub>2</sub>: C, 74.28; H, 12.17; N, 4.13; Found: C, 74.43; H, 12.20; N, 4.13.

#### **(S)-1-(3-methoxypyrrolidin-1-yl)hexadecan-1-one (1m)**

Following the **General Procedure B** (eluent: EtOAc/PE 1: 10), the reaction of **1k** with CH<sub>3</sub>I afford **1m** (20 mg; yield: 95%) as colorless oil;  $[\alpha]_D^{20}$  45.0 (c 0.3, CHCl<sub>3</sub>); IR (film) $\nu_{\max}$ : 2956, 2924, 2851, 1642, 1464, 1431, 1374 cm<sup>-1</sup>; <sup>1</sup>H NMR (400 MHz, CDCl<sub>3</sub>)  $\delta$  0.88 (t, J = 7.2 Hz, 3 H), 1.25–1.33 (m, 24 H), 1.60–1.66 (m, 2 H), 1.87–2.10 (m, 2 H), 2.21–2.27 (m, 2 H), 3.33 (d, J = 8.0 Hz, 3 H), 3.42–3.69 (m, 4 H), 3.94 (dd, J = 28.0, 2.0 Hz, 1 H) ppm; <sup>13</sup>C NMR (100 MHz, CDCl<sub>3</sub>)  $\delta$  14.1, 22.6, 24.8, 29.3, 29.4, 29.5, 29.6, 29.7, 31.5, 31.8, 34.6, 34.8, 43.4, 44.5, 50.2, 51.7, 56.4, 56.5, 78.4, 79.9, 171.9, 172.1 ppm; MS (ESI, m/z): 340 (M + H)<sup>+</sup>; Anal. calcd for C<sub>21</sub>H<sub>41</sub>NO<sub>2</sub>: C, 74.28; H, 12.17; N, 4.13; Found: C, 74.38; H, 12.15; N, 4.12.

#### **1-palmitoylpyrrolidine-3-carbonitrile (1n)**

Following the **General Procedure A** (eluent: EtOAc/PE 1: 5), the amidation of palmitoyl chloride with pyrrolidine-3-carbonitrile afford **1n** (92 mg; yield: 92%) as white solid, mp: 57.5–59.3 °C; IR (film) $\nu_{\max}$ : 2914, 2849, 2250, 1637, 1430 cm<sup>-1</sup>; <sup>1</sup>H NMR (400 MHz, CDCl<sub>3</sub>)  $\delta$  0.88 (t, J = 6.4 Hz, 3 H), 1.26–1.30 (m, 24 H), 1.63–1.66 (m, 2 H), 2.18–2.38 (m, 4 H), 3.09–3.24 (m, 1 H), 3.52–3.58 (m, 1 H), 3.63–3.82 (m, 3 H) ppm; <sup>13</sup>C NMR (100 MHz, CDCl<sub>3</sub>)  $\delta$  14.0, 22.6, 24.6, 24.7, 27.1, 28.6, 28.7, 29.2, 29.3, 29.4, 29.5, 29.5, 29.6, 30.4, 31.8, 34.5, 34.7, 44.3, 44.9, 48.5, 49.2, 119.3, 119.7, 171.5, 171.9 ppm; MS (ESI, m/z): 335 (M + H)<sup>+</sup>; Anal. calcd for C<sub>21</sub>H<sub>38</sub>N<sub>2</sub>O: C, 75.39; H, 11.45; N, 8.37. Found: C, 75.44; H, 11.47; N, 8.33.

#### **1-palmitoylpyrrolidine-3-carboxamide (1o)**

Following the **General Procedure A** (eluent: EtOAc/PE 1: 5), the amidation of palmitoyl chloride with pyrrolidine-3-carboxamide afford **1o** (93 mg; yield: 88%) as white solid, mp: 121.2–122.4 °C; IR (film) $\nu_{\max}$ : 3374, 2917, 2849, 1650, 1632, 1469, 1440 cm<sup>-1</sup>; <sup>1</sup>H NMR (400 MHz, CDCl<sub>3</sub>)  $\delta$  0.88 (t, J = 6.8 Hz, 3 H), 1.25–1.30 (m, 24 H), 1.57–1.60 (m, 2 H), 2.12–2.30 (m, 4 H), 2.93–3.11 (m, 1 H), 3.36–3.48 (m, 1 H), 3.55–3.80 (m, 3 H), 6.18 (br, 1 H), 6.51 (br, 1 H) ppm; <sup>13</sup>C NMR (100 MHz, CDCl<sub>3</sub>)  $\delta$  14.0, 22.6, 24.7, 28.5, 29.2, 29.3, 29.4, 29.4, 29.5, 29.6, 31.8, 34.5, 34.6, 42.3, 44.3, 45.3, 46.1, 48.5, 48.8, 171.9, 172.0, 174.5, 174.9 ppm; MS (ESI, m/z): 353 (M + H)<sup>+</sup>; Anal. calcd for C<sub>21</sub>H<sub>40</sub>N<sub>2</sub>O<sub>2</sub>: C, 71.61; H, 11.46; N, 7.95; Found: C, 71.54; H, 11.44; N, 7.95.

### **1-palmitoylpyrrolidin-3-one (1p)**

To a solution of DMP (212 mg, 0.5 mmol) in CH<sub>2</sub>Cl<sub>2</sub> (5 mL), was added dropwise **1j** or **1k** (65 mg, 0.2 mmol) in CH<sub>2</sub>Cl<sub>2</sub> (5 mL) under nitrogen atmosphere, the mixture was stirred at the room temperature for 3 hours, filtered and concentrated in vacuo. The residue was purified by flash chromatography on silica gel (eluent: EtOAc/PE 1: 5) to afford compound **2i** (42 mg, 64%) as white crystals, mp: 77.3–78.6 °C; IR (film) $\nu_{\max}$ : 2955, 2923, 2852, 1730, 1648, 1466, 1422 cm<sup>-1</sup>; <sup>1</sup>H NMR (400 MHz, CDCl<sub>3</sub>)  $\delta$  0.88 (t, J = 6.8 Hz, 3 H), 1.26–1.30 (m, 24 H), 1.65–1.69 (m, 3 H), 2.24 (t, J = 8.0 Hz, 1 H), 2.34 (t, J = 8.0 Hz, 1 H), 2.62 (t, J = 8.0 Hz, 1 H), 2.70 (t, J = 8.0 Hz, 1 H), 3.88–3.93 (m, 4 H) ppm; <sup>13</sup>C NMR (100 MHz, CDCl<sub>3</sub>)  $\delta$  14.1, 22.7, 24.6, 24.7, 29.3, 29.4, 29.5, 29.6, 29.6, 29.7, 31.9, 33.3, 35.0, 36.2, 37.4, 41.8, 43.3, 52.3, 53.1, 172.4, 172.6, 209.7, 209.9 ppm; MS (ESI, m/z): 324 (M + H)<sup>+</sup>; Anal. calcd for C<sub>20</sub>H<sub>37</sub>NO<sub>2</sub>: C, 74.25; H, 11.53; N, 4.33; Found: C, 74.11; H, 11.50; N, 4.34.

### **(R)-1-(2-(hydroxymethyl)pyrrolidin-1-yl)hexadecan-1-one (1q)**

Following the **General Procedure A** (eluent: EtOAc/PE 1: 2), the amidation of palmitoyl chloride with (R)-pyrrolidin-2-ylmethanol afford **1q** (66 mg; yield: 65%) as white crystals, mp: 38.1–40.0 °C; [ $\alpha$ ]<sub>D</sub><sup>20</sup> 25.5 (c 0.1, CDCl<sub>3</sub>); IR (film) $\nu_{\max}$ : 3415, 2918, 2850, 1620, 1462, 1050 cm<sup>-1</sup>; <sup>1</sup>H NMR (400 MHz, CDCl<sub>3</sub>)  $\delta$  0.88 (t, J = 7.1 Hz, 3 H), 1.26–1.31 (m, 24 H), 1.55–1.68 (m, 3 H), 1.83–2.08 (m, 3 H), 2.30 (t, J = 7.8 Hz, 2 H), 3.43–3.67 (m, 4 H), 4.18–4.25 (m, 1 H), 5.22 (s, 1 H) ppm; <sup>13</sup>C NMR (100 MHz, CDCl<sub>3</sub>)  $\delta$  14.0, 22.6, 24.3, 24.7, 28.2, 29.3, 29.3, 29.4, 29.4, 29.5, 29.6, 29.6, 31.9, 35.0, 48.0, 61.0, 67.4, 174.6 ppm; MS (ESI, m/z): 340 (M + H)<sup>+</sup>; Anal. calcd for C<sub>21</sub>H<sub>41</sub>NO<sub>2</sub>: C, 74.28; H, 12.17; N, 4.13; Found: C, 74.31; H, 12.15; N, 4.12.

### **(S)-1-(2-(hydroxymethyl)pyrrolidin-1-yl)hexadecan-1-one (1r)**

Following the **General Procedure A** (eluent: EtOAc/PE 1: 2), the amidation of palmitoyl chloride with (S)-pyrrolidin-2-ylmethanol afford **1r** (64 mg; yield: 63%) as white crystals, mp: 45.0–45.5 °C; [ $\alpha$ ]<sub>D</sub><sup>20</sup> –25.5 (c 0.1, CDCl<sub>3</sub>); IR (film) $\nu_{\max}$ : 3414, 2916, 2849, 1619, 1463, 1051 cm<sup>-1</sup>; <sup>1</sup>H NMR (400 MHz, CDCl<sub>3</sub>)  $\delta$  0.88 (t, J = 6.9 Hz, 3 H), 1.26–1.31 (m, 24 H), 1.56–1.68 (m, 3 H), 1.83–2.08 (m, 3 H), 2.30 (t, J = 7.8 Hz, 2 H), 3.43–3.66 (m, 4 H), 4.18–4.24 (m, 1 H), 5.21 (s, 1 H) ppm; <sup>13</sup>C NMR (100 MHz, CDCl<sub>3</sub>)  $\delta$  14.0, 22.6, 24.3, 24.7, 28.2, 29.3, 29.3, 29.4, 29.4, 29.6, 29.6, 29.6, 31.8, 35.0, 48.0, 61.0, 67.4, 76.7, 174.6 ppm; MS (ESI, m/z): 340 (M + H)<sup>+</sup>; Anal. calcd for C<sub>21</sub>H<sub>41</sub>NO<sub>2</sub>: C, 74.28; H, 12.17; N, 4.13; Found: C, 74.33; H, 12.18; N, 4.13.

### **(R)-1-(2-(methoxymethyl)pyrrolidin-1-yl)hexadecan-1-one (1s)**

Following the **General Procedure A** (eluent: EtOAc/PE 1: 5), the amidation of palmitoyl chloride with (R)-pyrrolidin-2-ylmethanol afford **1s** (89 mg; yield: 84%) as colorless oil; [ $\alpha$ ]<sub>D</sub><sup>20</sup> 37.1 (c 0.1, CDCl<sub>3</sub>); IR (film) $\nu_{\max}$ : 2919, 2849, 1642, 1574, 1537, 1466, 1413, 1113 cm<sup>-1</sup>; <sup>1</sup>H NMR (400 MHz, CDCl<sub>3</sub>)  $\delta$  0.88 (t, J = 6.8 Hz, 3 H), 1.26–1.30 (m, 24 H), 1.62–1.65 (m, 2 H), 1.86–2.05 (m, 4 H), 2.17–2.36 (m, 2 H), 3.21–3.47 (m, 6 H), 3.52–3.58 (m, 1 H), 4.02–4.25 (m, 1 H) ppm; <sup>13</sup>C NMR (100 MHz, CDCl<sub>3</sub>)  $\delta$  14.0, 21.8, 22.6, 24.1, 24.7, 25.1, 25.4, 27.4, 28.7, 29.3, 29.4, 29.4, 29.5, 29.6, 29.6, 31.8, 33.3, 34.2, 35.0, 45.4, 47.2, 56.2, 56.9, 58.9, 59.1, 72.3, 74.0, 172.1, 172.4 ppm; MS (ESI, m/z): 354 (M + H)<sup>+</sup>; Anal. calcd for C<sub>22</sub>H<sub>43</sub>NO<sub>2</sub>: C, 74.73; H, 12.26; N, 3.96; Found: C, 74.70; H, 12.27; N, 3.97.

### **(S)-1-(2-(methoxymethyl)pyrrolidin-1-yl)hexadecan-1-one (1t)**

Following the **General Procedure A** (eluent: EtOAc/PE 1: 5), the amidation of

palmitoyl chloride with (S)-2-(methoxymethyl)pyrrolidine afford **1t** (95 mg; yield: 89%) as colorless oil;  $[\alpha]_D^{20}$  -37.1 (c 0.1,  $\text{CDCl}_3$ ); IR (film) $\nu_{\text{max}}$ : 2919, 2850, 1650, 1458, 1415, 1114  $\text{cm}^{-1}$ ;  $^1\text{H}$  NMR (400 MHz,  $\text{CDCl}_3$ )  $\delta$  0.88 (t,  $J$  = 7.2 Hz, 3 H), 1.26–1.30 (m, 24 H), 1.61–1.65 (m, 2 H), 1.86–2.03 (m, 4 H), 2.23–2.36 (m, 2 H), 3.21–3.47 (m, 6 H), 3.52–3.56 (m, 1 H), 4.02–4.26 (m, 1 H) ppm;  $^{13}\text{C}$  NMR (100 MHz,  $\text{CDCl}_3$ )  $\delta$  14.1, 21.9, 22.7, 24.1, 24.8, 25.5, 27.4, 28.7, 29.3, 29.4, 29.4, 29.5, 29.6, 29.7, 31.9, 34.2, 35.0, 45.5, 47.3, 56.2, 56.9, 58.9, 59.1, 72.3, 74.1, 172.1, 172.5 ppm; MS (ESI,  $m/z$ ): 354 ( $\text{M} + \text{H}$ )<sup>+</sup>; Anal. calcd for  $\text{C}_{22}\text{H}_{43}\text{NO}_2$ : C, 74.73; H, 12.26; N, 3.96; Found: C, 74.74; H, 12.27; N, 3.95.

### 3-benzoyloxazolidin-2-one (**2a**)<sup>1</sup>

Following the **General Procedure E** (eluent: EtOAc/PE 1: 3), the imidation of benzoic acid with oxazolidin-2-one afford **2a** (52 mg; yield: 54%) as white crystals, mp: 194.2–196.3 °C; IR (film) $\nu_{\text{max}}$ : 2917, 2894, 1774, 1677, 1380, 1338, 1201, 1108  $\text{cm}^{-1}$ ;  $^1\text{H}$  NMR (400 MHz,  $\text{CDCl}_3$ )  $\delta$  4.16 (t,  $J$  = 8.0 Hz, 2 H), 4.48 (t,  $J$  = 8.0 Hz, 2 H), 7.44 (dd,  $J$  = 7.2, 7.2 Hz, 2 H), 7.55 (dd,  $J$  = 8.0, 7.2 Hz, 1 H), 7.65 (d,  $J$  = 8.0 Hz, 2 H) ppm;  $^{13}\text{C}$  NMR (100 MHz,  $\text{CDCl}_3$ )  $\delta$  43.1, 62.3, 127.88, 129.1, 132.4, 132.6, 153.2, 169.8 ppm; MS (ESI,  $m/z$ ): 192 ( $\text{M} + \text{H}$ )<sup>+</sup>; Anal. calcd for  $\text{C}_{10}\text{H}_9\text{NO}_3$ : C, 62.82; H, 4.74; N, 7.33. Found: C, 62.60; H, 4.73; N, 7.33.

### 3-(2-phenylacetyl)oxazolidin-2-one (**2b**)<sup>2</sup>

Following the **General Procedure E** (eluent: EtOAc/PE 1: 3), the imidation of 2-phenylacetic acid with oxazolidin-2-one afford **2b** (32 mg; yield: 31%) as white crystals, mp: 67.0–67.5 °C; IR (film) $\nu_{\text{max}}$ : 2917, 2856, 1770, 1683, 1385, 1217, 1084  $\text{cm}^{-1}$ ;  $^1\text{H}$  NMR (400 MHz,  $\text{CDCl}_3$ )  $\delta$  3.96 (t,  $J$  = 8.0 Hz, 2 H), 4.26 (s, 1 H), 4.31 (t,  $J$  = 8.0 Hz, 2 H), 7.24–7.33 (m, 5 H) ppm;  $^{13}\text{C}$  NMR (100 MHz,  $\text{CDCl}_3$ )  $\delta$  40.9, 42.5, 61.9, 127.0, 128.4, 129.6, 133.5, 153.4, 171.1 ppm; MS (ESI,  $m/z$ ): 206 ( $\text{M} + \text{H}$ )<sup>+</sup>; Anal. calcd for  $\text{C}_{11}\text{H}_{11}\text{NO}_3$ : C, 64.38; H, 5.40; N, 6.83. Found: C, 64.42; H, 5.41; N, 6.83.

### 3-(3-phenylpropanoyl)oxazolidin-2-one (**2c**)

Following the **General Procedure E** (eluent: EtOAc/PE 1: 3), the imidation of 3-phenylpropanoic acid with oxazolidin-2-one afford **2c** (41 mg; yield: 37%) as white crystals, mp: 114.3–116.6 °C; IR (film) $\nu_{\text{max}}$ : 2917, 2856, 1766, 1692, 1390, 1317, 1227, 1043  $\text{cm}^{-1}$ ;  $^1\text{H}$  NMR (400 MHz,  $\text{CDCl}_3$ )  $\delta$  2.99 (t,  $J$  = 7.6 Hz, 2 H), 3.25 (t,  $J$  = 7.6 Hz, 2 H), 3.99 (d,  $J$  = 8.0 Hz, 2 H), 4.37 (t,  $J$  = 8.0 Hz, 2 H), 7.18–7.30 (m, 5 H) ppm;  $^{13}\text{C}$  NMR (100 MHz,  $\text{CDCl}_3$ )  $\delta$  30.1, 36.7, 42.4, 62.0, 126.2, 128.4, 128.5, 153.5, 172.5 ppm; MS (ESI,  $m/z$ ): 220 ( $\text{M} + \text{H}$ )<sup>+</sup>; Anal. calcd for  $\text{C}_{12}\text{H}_{13}\text{NO}_3$ : C, 65.74; H, 5.98; N, 6.39. Found: C, 65.81; H, 5.97; N, 6.39.

### 3-(4-phenylbutanoyl)oxazolidin-2-one (**2d**)

Following the **General Procedure E** (eluent: EtOAc/PE 1: 4), the imidation of 4-phenylbutanoic acid with oxazolidin-2-one afford **2d** (52 mg; yield: 45%) as white crystals, mp: 72.9–74.4 °C; IR (film) $\nu_{\text{max}}$ : 2919, 2850, 1779, 1737, 1702, 1496, 1478, 1386, 1240, 1041  $\text{cm}^{-1}$ ;  $^1\text{H}$  NMR (400 MHz,  $\text{CDCl}_3$ )  $\delta$  1.95–2.04 (m, 2 H), 2.69 (t,  $J$  = 7.6 Hz, 2 H), 2.96 (t,  $J$  = 7.6 Hz, 2 H), 3.96 (t,  $J$  = 8.4 Hz, 2 H), 4.36 (t,  $J$  = 8.4 Hz, 2 H), 7.19–7.20 (m, 3 H), 7.26–7.29 (m, 2 H) ppm;  $^{13}\text{C}$  NMR (100 MHz,  $\text{CDCl}_3$ )  $\delta$  25.8, 34.5, 35.1, 42.4, 62.0, 125.9, 128.3, 128.4, 141.4, 153.5, 173.2 ppm; MS (ESI,  $m/z$ ): 234 ( $\text{M} + \text{H}$ )<sup>+</sup>; Anal. calcd for  $\text{C}_{13}\text{H}_{15}\text{NO}_3$ : C, 66.94; H, 6.48; N, 6.00. Found: C, 66.78; H, 6.48; N, 5.99.



### **3-(5-phenylpentanoyl)oxazolidin-2-one (2e)<sup>3</sup>**

Following the **General Procedure E** (eluent: EtOAc/PE 1: 4), the imidation of 5-phenylpentanoic acid with oxazolidin-2-one afford **2e** (69 mg; yield: 56%) as white crystals, mp: 62.6–65.3 °C; IR (film) $\nu_{\text{max}}$ : 2924, 2858, 1780, 1700, 1497, 1478, 1453, 1388, 1225, 1111, 1040  $\text{cm}^{-1}$ ;  $^1\text{H}$  NMR (400 MHz,  $\text{CDCl}_3$ )  $\delta$  1.69–1.71 (m, 4 H), 2.64 (t,  $J = 7.2$  Hz, 2 H), 2.94 (t,  $J = 7.2$  Hz, 2 H), 3.98 (t,  $J = 8.4$  Hz, 2 H), 4.37 (t,  $J = 8.4$  Hz, 2 H), 7.17–7.19 (m, 3 H), 7.25–7.29 (m, 2 H) ppm;  $^{13}\text{C}$  NMR (100 MHz,  $\text{CDCl}_3$ )  $\delta$  23.8, 30.7, 34.8, 35.5, 42.4, 61.9, 125.7, 128.2, 128.3, 142.1, 153.5, 173.3 ppm; MS (ESI,  $m/z$ ): 248 ( $\text{M} + \text{H}$ )<sup>+</sup>; Anal. calcd for  $\text{C}_{14}\text{H}_{17}\text{NO}_3$ : C, 68.00; H, 6.93; N, 5.66. Found: C, 68.20; H, 6.91; N, 5.67.

### **3-(6-phenylhexanoyl)oxazolidin-2-one (2f)**

Following the **General Procedure E** (eluent: EtOAc/PE 1: 4), the imidation of 6-phenylhexanoic acid with oxazolidin-2-one afford **2f** (41 mg; yield: 31%) as white crystals, mp: 65.3–66.9 °C; IR (film) $\nu_{\text{max}}$ : 2920, 2858, 1780, 1700, 1388, 1225, 1111, 1039  $\text{cm}^{-1}$ ;  $^1\text{H}$  NMR (400 MHz,  $\text{CDCl}_3$ )  $\delta$  1.36–1.44 (m, 2 H), 1.61–1.73 (m, 4 H), 2.61 (t,  $J = 7.6$  Hz, 2 H), 2.90 (t,  $J = 7.6$  Hz, 2 H), 3.97 (t,  $J = 8.4$  Hz, 2 H), 4.36 (t,  $J = 8.4$  Hz, 2 H), 7.16–7.18 (m, 3 H), 7.24–7.28 (m, 2 H) ppm;  $^{13}\text{C}$  NMR (100 MHz,  $\text{CDCl}_3$ )  $\delta$  24.0, 28.6, 31.1, 34.9, 35.6, 42.4, 61.9, 125.5, 128.2, 128.3, 142.4, 153.4, 173.3 ppm; MS (ESI,  $m/z$ ): 262 ( $\text{M} + \text{H}$ )<sup>+</sup>; HRMS (ESI) calcd for  $[\text{C}_{15}\text{H}_{20}\text{NO}_3]^+$  ( $\text{M} + \text{H}$ )<sup>+</sup>: 262.1443; found: 262.1438; Anal. calcd for  $\text{C}_{15}\text{H}_{19}\text{NO}_3$ : C, 68.94; H, 7.33; N, 5.36. Found: C, 68.70; H, 7.31; N, 5.38.

### **3-(7-phenylheptanoyl)oxazolidin-2-one (2g)**

Following the **General Procedure E** (eluent: EtOAc/PE 1: 5), the imidation of 7-phenylheptanoic acid with oxazolidin-2-one afford **2g** (61 mg; yield: 44%) as white wax; IR (film) $\nu_{\text{max}}$ : 2918, 2850, 1781, 1703, 1386, 1225, 1039  $\text{cm}^{-1}$ ;  $^1\text{H}$  NMR (400 MHz,  $\text{CDCl}_3$ )  $\delta$  1.35–1.42 (m, 4 H), 1.58–1.69 (m, 4 H), 2.60 (t,  $J = 7.6$  Hz, 2 H), 2.90 (t,  $J = 7.6$  Hz, 2 H), 3.98 (t,  $J = 8.4$  Hz, 2 H), 4.36 (t,  $J = 8.4$  Hz, 2 H), 7.16–7.17 (m, 3 H), 7.24–7.28 (m, 2 H) ppm;  $^{13}\text{C}$  NMR (100 MHz,  $\text{CDCl}_3$ )  $\delta$  24.1, 28.9, 28.9, 31.2, 35.0, 35.8, 42.4, 61.9, 125.5, 128.1, 128.3, 142.6, 153.5, 173.4 ppm; MS (ESI,  $m/z$ ): 276 ( $\text{M} + \text{H}$ )<sup>+</sup>; Anal. calcd for  $\text{C}_{16}\text{H}_{21}\text{NO}_3$ : C, 69.79; H, 7.69; N, 5.09. Found: C, 69.83; H, 7.68; N, 5.10.

### **3-(8-phenyloctanoyl)oxazolidin-2-one (2h)**

Following the **General Procedure E** (eluent: EtOAc/PE 1: 5), the imidation of 8-phenyloctanoic acid with oxazolidin-2-one afford **2h** (64 mg; yield: 44%) as white crystals, mp: 71.5–72.3 °C; IR (film) $\nu_{\text{max}}$ : 2920, 2848, 1780, 1703, 1386, 1225, 1020  $\text{cm}^{-1}$ ;  $^1\text{H}$  NMR (400 MHz,  $\text{CDCl}_3$ )  $\delta$  1.35–1.42 (m, 4 H), 1.58–1.69 (m, 4 H), 2.60 (t,  $J = 7.6$  Hz, 2 H), 2.90 (t,  $J = 7.6$  Hz, 2 H), 3.98 (t,  $J = 8.4$  Hz, 2 H), 4.36 (t,  $J = 8.4$  Hz, 2 H), 7.16–7.17 (m, 3 H), 7.24–7.28 (m, 2 H) ppm;  $^{13}\text{C}$  NMR (100 MHz,  $\text{CDCl}_3$ )  $\delta$  24.1, 28.9, 28.9, 31.2, 35.0, 35.8, 42.4, 61.9, 125.5, 128.1, 128.3, 142.6, 153.5, 173.4 ppm; MS (ESI,  $m/z$ ): 290 ( $\text{M} + \text{H}$ )<sup>+</sup>; Anal. calcd for  $\text{C}_{17}\text{H}_{23}\text{NO}_3$ : C, 70.56; H, 8.01; N, 4.84. Found: C, 70.61; H, 7.99; N, 4.85.

### **Biphenyl-4-yl-carbonyl oxazolidin-2-one (3a)<sup>1</sup>**

Following the **General Procedure E** (eluent: EtOAc/PE 1: 2), the imidation of 4-phenylbenzoic acid with oxazolidin-2-one afford **3a** (71 mg; yield: 53%) as white crystals, mp: 251.6–253.7 °C; IR (film) $\nu_{\text{max}}$ : 2917, 2849, 1761, 1676, 1579, 1384,

1332, 1204, 1099, 1032  $\text{cm}^{-1}$ ;  $^1\text{H}$  NMR (400 MHz,  $\text{CDCl}_3$ )  $\delta$  4.20 (t,  $J = 8.0$  Hz, 2 H), 4.52 (t,  $J = 8.0$  Hz, 2 H), 7.39 (t,  $J = 7.6$  Hz, 1 H), 7.46 (t,  $J = 7.6$  Hz, 2 H), 7.61–7.66 (m, 4 H), 7.76 (d,  $J = 8.0$  Hz, 2 H) ppm;  $^{13}\text{C}$  NMR (100 MHz,  $\text{CDCl}_3$ )  $\delta$  43.8, 62.3, 126.6, 127.3, 128.1, 128.9, 129.8, 131.1, 140.0, 145.3, 153.3, 169.5 ppm; MS (ESI,  $m/z$ ): 268 ( $\text{M} + \text{H}$ ) $^+$ ; Anal. calcd for  $\text{C}_{16}\text{H}_{13}\text{NO}_3$ : C, 71.90; H, 4.90; N, 5.24. Found: C, 72.10; H, 4.91; N, 5.23.

### **3-(4-phenoxybenzoyl)oxazolidin-2-one (3b)<sup>1</sup>**

Following the **General Procedure E** (eluent: EtOAc/PE 1: 2), the imidation of 4-phenoxybenzoic acid with oxazolidin-2-one afford **3b** (77 mg; yield: 55%) as white crystals, mp: 149.0–151.5  $^\circ\text{C}$ ; IR (film) $\nu_{\text{max}}$ : 2915, 2844, 1779, 1681, 1575, 1482, 1445, 1382, 1322  $\text{cm}^{-1}$ ;  $^1\text{H}$  NMR (400 MHz,  $\text{CDCl}_3$ )  $\delta$  4.17 (t,  $J = 8.0$  Hz, 2 H), 4.50 (t,  $J = 8.0$  Hz, 2 H), 6.97 (ddd,  $J = 8.4, 2.8, 2.0$  Hz, 2 H), 7.08 (dd,  $J = 8.4, 0.8$  Hz, 2 H), 7.19 (dd,  $J = 7.6$  Hz, 1 H), 7.40 (ddd,  $J = 8.4, 7.6, 2.0$  Hz, 2 H), 7.67 (ddd,  $J = 8.4, 2.8, 2.0$  Hz, 2 H) ppm;  $^{13}\text{C}$  NMR (100 MHz,  $\text{CDCl}_3$ )  $\delta$  43.9, 62.2, 116.7, 120.3, 124.6, 126.4, 130.0, 131.7, 153.4, 155.5, 161.7, 168.9 ppm; MS (ESI,  $m/z$ ): 284 ( $\text{M} + \text{H}$ ) $^+$ ; Anal. calcd for  $\text{C}_{16}\text{H}_{13}\text{NO}_4$ : C, 67.84; H, 4.63; N, 4.94. Found: C, 67.75; H, 4.63; N, 4.95.

### **3-(4-(benzyloxy)benzoyl)oxazolidin-2-one (3c)**

Following the **General Procedure E** (eluent: EtOAc/PE 1: 5), the imidation of 4-(benzyloxy)benzoic acid with oxazolidin-2-one afford **3c** (108 mg; yield: 73%) as white crystals, mp: 198.0–201.3  $^\circ\text{C}$ ; IR (film) $\nu_{\text{max}}$ : 2916, 2849, 1774, 1670, 1607, 1512, 1378, 1338, 1249, 1194, 1108, 1024  $\text{cm}^{-1}$ ;  $^1\text{H}$  NMR (400 MHz,  $\text{CDCl}_3$ )  $\delta$  4.14 (t,  $J = 8.0$  Hz, 2 H), 4.47 (t,  $J = 8.0$  Hz, 2 H), 5.11 (s, 2 H), 6.99 (d,  $J = 8.8$  Hz, 2 H), 7.34–7.43 (m, 5 H), 7.69 (d,  $J = 8.8$  Hz, 2 H) ppm;  $^{13}\text{C}$  NMR (100 MHz,  $\text{CDCl}_3$ )  $\delta$  43.9, 62.2, 70.1, 114.0, 124.7, 127.5, 128.2, 128.6, 131.8, 136.2, 153.5, 162.4, 169.0 ppm; MS (ESI,  $m/z$ ): 298 ( $\text{M} + \text{H}$ ) $^+$ ; Anal. calcd for  $\text{C}_{17}\text{H}_{15}\text{NO}_4$ : C, 68.68; H, 5.09; N, 4.71. Found: C, 68.90; H, 5.11; N, 4.69.

### **4-phenethoxybenzoic acid (3d-1)**

Following the **General Procedure F** (eluent: EtOAc/PE 1: 5), the reaction starting from 4-hydroxybenzoic acid afford **3d-1** (315 mg; yield: 65%) as white wax; IR (film) $\nu_{\text{max}}$ : 3415, 2949, 2917, 2848, 1677, 1608, 1254  $\text{cm}^{-1}$ ;  $^1\text{H}$  NMR (400 MHz,  $\text{CDCl}_3$ )  $\delta$  3.13 (d,  $J = 7.0$  Hz, 2 H), 4.24 (d,  $J = 7.0$  Hz, 2 H), 6.93 (d,  $J = 8.8$  Hz, 2 H), 7.23–7.35 (m, 5 H), 7.33–7.40 (m, 4 H), 8.04 (dd,  $J = 7.1$  Hz, 1.8 Hz, 2 H) ppm;  $^{13}\text{C}$  NMR (100 MHz,  $\text{CDCl}_3$ )  $\delta$  35.6, 68.9, 114.2, 121.7, 126.7, 128.6, 128.9, 132.3, 137.8, 163.3, 171.5 ppm; MS (ESI,  $m/z$ ): 243 ( $\text{M} + \text{H}$ ) $^+$ ; Anal. calcd for  $\text{C}_{17}\text{H}_{15}\text{NO}_4$ : C, 74.36; H, 5.82. Found: C, 74.21; H, 5.82.

### **3-(4-phenethoxybenzoyl)oxazolidin-2-one (3d)**

Following the **General Procedure E** (eluent: EtOAc/PE 1: 5), the imidation of **3d-1** with oxazolidin-2-one afford **3d** (84 mg; yield: 54%) as white crystals, mp: 127.3–129.7  $^\circ\text{C}$ ; IR (film) $\nu_{\text{max}}$ : 2916, 2849, 1777, 1672, 1605, 1508, 1384, 1324, 1307, 1254, 1168, 1094, 1029  $\text{cm}^{-1}$ ;  $^1\text{H}$  NMR (400 MHz,  $\text{CDCl}_3$ )  $\delta$  3.11 (t,  $J = 7.2$  Hz, 2 H), 4.14 (t,  $J = 8.0$  Hz, 2 H), 4.22 (t,  $J = 7.2$  Hz, 2 H), 4.46 (t,  $J = 8.0$  Hz, 2 H), 6.90 (d,  $J = 8.4$  Hz, 2 H), 7.23–7.34 (m, 5 H), 7.67 (d,  $J = 8.4$  Hz, 2 H) ppm;  $^{13}\text{C}$  NMR (100 MHz,  $\text{CDCl}_3$ )  $\delta$  35.6, 43.9, 62.2, 68.8, 113.7, 124.4, 126.6, 128.5, 129.0, 131.8, 137.8, 153.5, 162.5, 169.0 ppm; MS (ESI,  $m/z$ ): 312 ( $\text{M} + \text{H}$ ) $^+$ ; Anal. calcd for  $\text{C}_{18}\text{H}_{17}\text{NO}_4$ : C, 69.44; H, 5.50; N, 4.50. Found: C, 69.53; H, 5.51; N, 4.49

### **3-(4-benzylidenepiperidine-1-carbonyl)oxazolidin-2-one (3e)**

Following the **General Procedure G** (eluent: EtOAc/PE 1: 4), the reaction starting from 4-benzylidenepiperidine afford **3e** (18 mg; yield: 16%) as yellow oil; <sup>1</sup>H NMR (400 MHz, CDCl<sub>3</sub>) δ 2.47 (t, J = 5.7 Hz, 2 H), 2.60 (t, J = 5.7 Hz, 2 H), 3.50–3.58 (m, 2 H), 3.62–3.67 (m, 2 H), 3.99 (t, J = 7.8 Hz, 2 H), 4.42 (t, J = 7.8 Hz, 2 H), 6.4 (s, 1 H), 7.18–7.24 (m, 3 H), 7.33 (dd, J = 7.4, 7.4 Hz, 2 H) ppm; <sup>13</sup>C NMR (100 MHz, CDCl<sub>3</sub>) δ 31.2, 36.7, 42.4, 44.3, 44.4, 62.4, 123.3, 126.0, 128.1, 128.9, 129.9, 140.6, 152.5, 154.1 ppm; MS (ESI, m/z): 287 (M + H)<sup>+</sup>; HRMS (ESI) calcd for [C<sub>16</sub>H<sub>19</sub>N<sub>2</sub>O<sub>3</sub>]<sup>+</sup> (M + H)<sup>+</sup>: 287.1396; found: 287.1389.

### **3-(4-benzylpiperidine-1-carbonyl)oxazolidin-2-one (3f)**

Following the **General Procedure G** (eluent: EtOAc/PE 1: 4), the reaction starting from 4-benzylpiperidine afford **3f** (15 mg; yield: 13%) as colorless oil; <sup>1</sup>H NMR (400 MHz, CDCl<sub>3</sub>) δ 1.23–1.37 (m, 2 H), 1.67–1.79 (m, 3 H), 2.55 (d, J = 7.1 Hz, 2 H), 2.88 (br, 2 H), 3.93 (t, J = 7.8 Hz, 2 H), 4.37 (t, J = 7.8 Hz, 2 H), 6.8 (d, J = 6.8 Hz, 2 H), 7.19 (dd, J = 7.2, 7.2 Hz, 1 H), 7.25–7.29 (m, 2 H) ppm; <sup>13</sup>C NMR (100 MHz, CDCl<sub>3</sub>) δ 31.7, 37.8, 42.7, 44.3, 62.6, 125.9, 128.1, 128.9, 139.8, 152.4, 154.2 ppm; MS (ESI, m/z): 289 (M + H)<sup>+</sup>; HRMS (ESI) calcd for [C<sub>16</sub>H<sub>21</sub>N<sub>2</sub>O<sub>3</sub>]<sup>+</sup> (M + H)<sup>+</sup>: 289.1552; found: 289.1541.

### **3-(1-benzylpiperazine-4-carbonyl)oxazolidin-2-one (3g)**

Following the **General Procedure G** (eluent: EtOAc/PE 1: 1), the reaction starting from 1-benzylpiperazine afford **3g** (14 mg; yield: 12%) as colorless oil; <sup>1</sup>H NMR (400 MHz, CDCl<sub>3</sub>) δ 2.51 (d, J = 5.1 Hz, 4 H), 3.52–3.57 (m, 6 H), 3.94 (t, J = 7.8 Hz, 2 H), 4.38 (t, J = 7.8 Hz, 2 H), 7.24–7.34 (m, 5 H) ppm; <sup>13</sup>C NMR (100 MHz, CDCl<sub>3</sub>) δ 43.6, 44.3, 52.5, 62.6, 62.7, 127.2, 128.2, 129.0, 137.3, 152.4, 154.1 ppm; MS (ESI, m/z): 290 (M + H)<sup>+</sup>; HRMS (ESI) calcd for [C<sub>15</sub>H<sub>20</sub>N<sub>3</sub>O<sub>3</sub>]<sup>+</sup> (M + H)<sup>+</sup>: 290.1505; found: 290.1517.

### **4-benzylidenecyclohexanecarboxylic acid (3h-1)<sup>5</sup>**

To a solution of Benzyltriphenylphosphonium chloride (389 mg, 1.0 mmol) in THF (15 mL) was added slowly a solution of 2 M LiHMDS (2.5 mmol, 1.25 mL THF) under nitrogen atmosphere at –78°C. The reaction mixture was stirred at –78°C for 15 min, and allowed to warm slowly to 0°C in 0.5 hour. After being stirred at 0°C for 1 hour, a solution of 4-Oxocyclohexanecarboxylic acid (150 mg, 1.05 mmol) in THF (2 mL) was slowly added at –78°C. The reaction mixture was allowed to warm slowly to 0°C and stirred at the same temperature for 18 hour. The reaction was quenched with 15 mL aqueous 4 M HCl and extracted with EtOAc (3 × 5 mL). The combined organic layers were dried over anhydrous Na<sub>2</sub>SO<sub>4</sub>, filtered and concentrated under reduced pressure. The residue was purified by flash chromatography on silica gel (eluent: EtOAc/PE 1: 5) to afford **3h-1** (60 mg; yield: 28%) as colorless oil; <sup>1</sup>H NMR (400 MHz, CDCl<sub>3</sub>) δ 1.54–1.76 (m, 2 H), 1.99–2.12 (m, 3 H), 2.21–2.27 (m, 1 H), 2.42–2.45 (m, 1 H), 2.54–2.59 (m, 1 H), 2.84–2.87 (m, 1 H), 6.29 (s, 1 H), 7.17–7.23 (m, 3 H), 7.30 (dd, J = 7.6, 7.6 Hz, 2 H) ppm; <sup>13</sup>C NMR (100 MHz, CDCl<sub>3</sub>) δ 27.6, 29.3, 30.0, 25.6, 42.6, 123.4, 126.0, 128.0, 128.8, 137.8, 140.4, 181.9 ppm; MS (ESI, m/z): 217 (M + H)<sup>+</sup>; Anal. calcd for C<sub>14</sub>H<sub>16</sub>O<sub>2</sub>: C, 77.75; H, 7.46. Found: C, 77.88; H, 7.47.

### **3-(4-benzylidenecyclohexanecarbonyl)oxazolidin-2-one (3h)**

Following the **General Procedure E** (eluent: EtOAc/PE 1: 5), the imidation of **3h-1** afford **3h** (78 mg; yield: 55%) as colorless oil;  $^1\text{H NMR}$  (400 MHz,  $\text{CDCl}_3$ )  $\delta$  1.50–1.72 (m, 3 H), 1.93–1.99 (m, 1 H), 2.01–2.08 (m, 2 H), 2.30–2.38 (m, 1 H), 2.43–2.47 (m, 1 H), 2.93–2.97 (m, 1 H), 3.70–3.78 (m, 1 H), 4.00 (t,  $J = 7.8$  Hz, 2 H), 4.40 (t,  $J = 7.8$  Hz, 2 H), 6.32 (s, 1 H), 7.71–7.21 (m, 3 H), 7.29–7.32 (m, 2 H) ppm;  $^{13}\text{C NMR}$  (100 MHz,  $\text{CDCl}_3$ )  $\delta$  27.8, 29.6, 30.3, 35.7, 41.7, 42.7, 61.9, 123.3, 126.0, 128.0, 128.9, 137.9, 140.6, 153.1, 175.9 ppm; MS (ESI,  $m/z$ ): 286 ( $M + H$ ) $^+$ ; Anal. calcd for  $\text{C}_{17}\text{H}_{19}\text{NO}_3$ : C, 71.56; H, 6.71; N, 4.91. Found: C, 71.37; H, 6.72; N, 4.91.

### **3-(4-benzylcyclohexanecarbonyl)oxazolidin-2-one (3i)**

Compound **3h** (28 mg, 0.1 mmol) in EtOAc (10 mL) was treated with 10% Pd/C (200 mg) and purged with  $\text{H}_2$ . After stirring for 12 hours at room temperature, the reaction mixture was filtered through celite and concentrated under reduced pressure to afford the product as white wax (28 mg; yield: 98%);  $^1\text{H NMR}$  (400 MHz,  $\text{CDCl}_3$ )  $\delta$  1.53–1.68 (m, 6 H), 1.77–1.90 (m, 3 H), 2.62 (t,  $J = 7.6$  Hz, 2 H), 3.60–3.66 (m, 1 H), 4.01 (t,  $J = 8.0$  Hz, 2 H), 4.38 (t,  $J = 8.0$  Hz, 2 H), 6.32 (s, 1 H), 7.12–7.19 (m, 3 H), 7.25–7.29 (m, 2 H) ppm;  $^{13}\text{C NMR}$  (100 MHz,  $\text{CDCl}_3$ )  $\delta$  25.2, 28.6, 36.4, 39.8, 40.1, 42.8, 61.8, 125.7, 128.1, 129.0, 141.3, 153.1, 176.6 ppm; MS (ESI,  $m/z$ ): 288 ( $M + H$ ) $^+$ ; Anal. calcd for  $\text{C}_{17}\text{H}_{21}\text{NO}_3$ : C, 71.06; H, 7.37; N, 4.87. Found: C, 71.19; H, 7.38; N, 4.86.

### **6-cyclohexylhexanoic acid (3j-1)**<sup>4</sup>

To a solution of (4-Carboxybutyl)triphenylphosphonium bromide (443 mg, 1.0 mmol) in THF (15 mL) was added slowly a solution of 2 M LiHMDS (2.5 mmol, 1.25 mL THF) under nitrogen atmosphere at  $-78^\circ\text{C}$ . The reaction mixture was stirred at  $-78^\circ\text{C}$  for 15 min, and allowed to warm slowly to  $0^\circ\text{C}$  in 0.5 hour. After being stirred at  $0^\circ\text{C}$  for 1 hour, a solution of cyclohexanecarbaldehyde (112 mg, 1.05 mmol) in THF (2 mL) was slowly added at  $-78^\circ\text{C}$ . The reaction mixture was allowed to warm slowly to  $0^\circ\text{C}$  and stirred at the same temperature for 18 hour. The reaction was quenched with 15 mL aqueous 4 M HCl and extracted with EtOAc ( $3 \times 5$  mL). The combined organic layers were dried over anhydrous  $\text{Na}_2\text{SO}_4$ , filtered and concentrated under reduced pressure. The residue in EtOAc (10 mL) was treated with 10% Pd/C (200 mg) and purged with  $\text{H}_2$ . After stirring for 12 hours at room temperature, the reaction mixture was filtered through celite and concentrated under reduced pressure to afford the product **3j-1** (139 mg; yield: 70%) as colorless oil, IR (film) $\nu_{\text{max}}$ : 3404, 2918, 2850, 1709, 1445, 1025  $\text{cm}^{-1}$ ;  $^1\text{H NMR}$  (400 MHz,  $\text{CDCl}_3$ )  $\delta$  0.84–0.92 (m, 2 H), 1.14–1.34 (m, 10 H), 1.64–1.72 (m, 7 H), 2.36 (t,  $J = 7.5$  Hz, 2 H) ppm;  $^{13}\text{C NMR}$  (100 MHz,  $\text{CDCl}_3$ )  $\delta$  24.7, 26.4, 26.4, 26.7, 29.4, 33.4, 34.1, 37.2, 37.6, 180.1 ppm; MS (ESI,  $m/z$ ): 199 ( $M + H$ ) $^+$ ; Anal. calcd for  $\text{C}_{12}\text{H}_{22}\text{O}_2$ : C, 72.68; H, 11.18. Found: C, 72.55; H, 11.17.

### **3-(6-cyclohexylhexanoyl)oxazolidin-2-one (3j)**

Following the **General Procedure E** (eluent: EtOAc/PE 1: 5), the imidation of **3j-1** with oxazolidin-2-one afford **3j** (57 mg; yield: 43%) as white crystals, mp: 65.0–66.6  $^\circ\text{C}$ ; IR (film) $\nu_{\text{max}}$ : 2917, 2849, 1577, 1541, 1468, 1384, 1068, 1023  $\text{cm}^{-1}$ ;  $^1\text{H NMR}$  (400 MHz,  $\text{CDCl}_3$ )  $\delta$  0.82–0.90 (m, 2 H), 1.15–1.23 (m, 6 H), 1.32–1.34 (m, 4 H), 1.63–1.70 (m, 7 H), 2.92 (t,  $J = 7.6$  Hz, 2 H), 4.03 (t,  $J = 8.0$  Hz, 2 H), 4.42 (t,  $J = 8.0$  Hz, 2 H) ppm;  $^{13}\text{C NMR}$  (100 MHz,  $\text{CDCl}_3$ )  $\delta$  24.3, 26.4, 26.5, 26.7, 29.4, 33.4, 35.0, 37.3, 37.6, 42.5, 61.9, 153.5, 173.6 ppm; MS (ESI,  $m/z$ ): 268 ( $M + H$ ) $^+$ ; Anal. calcd for  $\text{C}_{15}\text{H}_{25}\text{NO}_3$ : C, 67.38; H, 9.42; N, 5.24. Found: C, 67.15; H, 9.41; N, 5.25.

### **Biphenyl-3-yl-carbonyl oxazolidin-2-one (3k)**

Following the **General Procedure E** (eluent: EtOAc/PE 1: 2), the imidation of 3-phenylbenzoic acid with oxazolidin-2-one afford **3k** (81 mg; yield: 61%) as white crystals, mp: 205.6–208.8 °C; IR (film) $\nu_{\max}$ : 2916, 2848, 1633, 1565, 1406, 1107, 1037  $\text{cm}^{-1}$ ;  $^1\text{H}$  NMR (400 MHz,  $\text{CDCl}_3$ )  $\delta$  4.19–4.20 (m, 2 H), 4.52 (br, 2 H), 7.36–7.38 (m, 1 H), 7.44 (br, 2 H), 7.50–7.52 (m, 1 H), 7.59–7.61 (m, 3 H), 7.77–7.78 (br, 1 H), 7.87 (s, 1 H) ppm;  $^{13}\text{C}$  NMR (100 MHz,  $\text{CDCl}_3$ )  $\delta$  43.7, 48.0, 48.2, 48.4, 48.6, 48.9, 62.6, 127.0, 127.6, 128.3, 128.7, 130.8, 140.0, 140.9, 153.9, 170.0 ppm; MS (ESI, m/z): 268 (M + H) $^+$ ; Anal. calcd for  $\text{C}_{16}\text{H}_{13}\text{NO}_3$ : C, 71.90; H, 4.90; N, 5.24. Found: C, 71.74; H, 4.89; N, 5.25.

### **Biphenyl-3-yl-methylcarbonyl oxazolidin-2-one (3l)**

Following the **General Procedure E** (eluent: EtOAc/PE 1: 3), the imidation of 3-phenylphenylacetic acid with oxazolidin-2-one afford **3l** (63 mg; yield: 45%) as white wax; IR (film) $\nu_{\max}$ : 2916, 2848, 1776, 1697, 1598, 1478, 1387, 1366, 1223, 1180, 1109  $\text{cm}^{-1}$ ;  $^1\text{H}$  NMR (400 MHz,  $\text{CDCl}_3$ )  $\delta$  4.02 (t, J = 8.0 Hz, 2 H), 4.35 (s, 2 H), 4.39 (t, J = 8.0 Hz, 2 H), 7.31 (d, J = 7.2 Hz, 1 H), 7.34 (d, J = 7.2 Hz, 1 H), 7.38–7.44 (m, 3 H), 7.50 (d, J = 7.6 Hz, 1 H), 7.55–7.60 (m, 1 H) ppm;  $^{13}\text{C}$  NMR (100 MHz,  $\text{CDCl}_3$ )  $\delta$  41.1, 42.7, 61.9, 126.0, 127.2, 127.3, 128.6, 128.6, 128.7, 128.9, 134.0, 140.8, 141.5, 153.5, 171.2 ppm; MS (ESI, m/z): 282 (M + H) $^+$ ; Anal. calcd for  $\text{C}_{17}\text{H}_{15}\text{NO}_3$ : C, 72.58; H, 5.37; N, 4.98. Found: C, 72.71; H, 5.39; N, 4.96.

### **Biphenyl-4-yl-methylcarbonyl oxazolidin-2-one (3m)**

Following the **General Procedure E** (eluent: EtOAc/PE 1: 3), the imidation of 4-phenylphenylacetic acid with oxazolidin-2-one afford **3m** (65 mg; yield: 46%) as white crystals, mp: 197.6–200 °C; IR (film) $\nu_{\max}$ : 2914, 2844, 1776, 1697, 1578, 1386, 1366, 1025  $\text{cm}^{-1}$ ;  $^1\text{H}$  NMR (400 MHz,  $\text{CDCl}_3$ )  $\delta$  4.00 (t, J = 8.4 Hz, 2 H), 4.31 (s, 2 H), 4.36 (t, J = 8.4 Hz, 2 H), 7.33 (t, J = 7.6 Hz, 1 H), 7.37–7.44 (m, 4 H), 7.54–7.58 (m, 4 H) ppm;  $^{13}\text{C}$  NMR (100 MHz,  $\text{CDCl}_3$ )  $\delta$  40.7, 42.6, 61.9, 126.9, 127.0, 127.2, 128.7, 130.1, 132.5, 140.0, 140.7, 153.4, 171.1 ppm; MS (ESI, m/z): 282 (M + H) $^+$ ; Anal. calcd for  $\text{C}_{17}\text{H}_{15}\text{NO}_3$ : C, 72.58; H, 5.37; N, 4.98. Found: C, 72.67; H, 5.38; N, 4.97.

### **3-(3-phenoxybenzoyl)oxazolidin-2-one (3n)**

Following the **General Procedure E** (eluent: EtOAc/PE 1: 2), the imidation of 3-phenoxybenzoic acid with oxazolidin-2-one afford **3n** (68 mg; yield: 48%) as white crystals, mp: 140.3–141.4 °C; IR (film) $\nu_{\max}$ : 2917, 2845, 1783, 1682, 1577, 1483, 1436, 1322, 1200  $\text{cm}^{-1}$ ;  $^1\text{H}$  NMR (400 MHz,  $\text{CDCl}_3$ )  $\delta$  4.14 (t, J = 8.0 Hz, 2 H), 4.46 (t, J = 8.0 Hz, 2 H), 7.04 (dd, J = 8.6, 1.0 Hz, 2 H), 7.12 (dd, J = 7.4, 0.9 Hz, 1 H), 7.18 (dddd, J = 7.2, 7.2, 2.0, 2.0 Hz, 1 H), 7.26 (br, 1 H), 7.33–7.39 (m, 4 H) ppm;  $^{13}\text{C}$  NMR (100 MHz,  $\text{CDCl}_3$ )  $\delta$  43.6, 62.2, 119.1, 119.1, 122.6, 123.6, 123.7, 129.4, 129.9, 134.3, 153.0, 156.6, 156.8, 169.1 ppm; MS (ESI, m/z): 284 (M + H) $^+$ ; Anal. calcd for  $\text{C}_{16}\text{H}_{13}\text{NO}_4$ : C, 67.84; H, 4.63; N, 4.94. Found: C, 68.01; H, 4.64; N, 4.93.

### **3-(2-(3-phenoxyphenyl)acetyl)oxazolidin-2-one (3o)**

Following the **General Procedure E** (eluent: EtOAc/PE 1: 5), the imidation of 2-(3-phenoxyphenyl)acetic acid with oxazolidin-2-one afford **3o** (78 mg; yield: 53%) as white wax; IR (film) $\nu_{\max}$ : 2914, 2844, 1777, 1701, 1583, 1486, 1387, 1366, 1269, 1246, 1211  $\text{cm}^{-1}$ ;  $^1\text{H}$  NMR (400 MHz,  $\text{CDCl}_3$ )  $\delta$  3.99 (t, J = 8.0 Hz, 2 H), 4.24 (s, 1

H), 4.37 (t, J = 8.0 Hz, 2 H), 6.89 (d, J = 7.8 Hz, 1 H), 6.96 (s, 1 H), 7.01 (dd, J = 8.4, 8.4 Hz, 3 H), 7.09 (dd, J = 7.8 Hz, 1 H), 7.25 (d, J = 7.8 Hz, 1 H), 7.31 (dd, J = 8.4, 8.4 Hz, 2 H) ppm; <sup>13</sup>C NMR (100 MHz, CDCl<sub>3</sub>) δ 40.9, 42.6, 61.9, 117.4, 118.9, 120.1, 123.2, 124.5, 129.6, 129.7, 135.3, 153.4, 156.9, 157.2, 170.8 ppm; MS (ESI, m/z): 298 (M + H)<sup>+</sup>; Anal. calcd for C<sub>17</sub>H<sub>15</sub>NO<sub>4</sub>: C, 68.68; H, 5.09; N, 4.71. Found: C, 68.51; H, 5.08; N, 4.72.

### **3-(2-(4-phenoxyphenyl)acetyl)oxazolidin-2-one (3p)**

Following the **General Procedure E** (eluent: EtOAc/PE 1: 5), the imidation of 2-(4-phenoxyphenyl)acetic acid with oxazolidin-2-one afford **3p** (88 mg; yield: 59%) as white crystals, mp: 122.3–124.9 °C; IR (film)<sub>v<sub>max</sub></sub>: 2916, 2848, 1777, 1577, 1537, 1486, 1467, 1385, 1237, 1108, 1040 cm<sup>-1</sup>; <sup>1</sup>H NMR (400 MHz, CDCl<sub>3</sub>) δ 4.02 (t, J = 8.0 Hz, 2 H), 4.25 (s, 2 H), 4.39 (t, J = 8.0 Hz, 2 H), 6.95–7.00 (m, 4 H), 7.09 (t, J = 7.6 Hz, 1 H), 7.27–7.32 (m, 4 H) ppm; <sup>13</sup>C NMR (100 MHz, CDCl<sub>3</sub>) δ 40.3, 42.6, 62.0, 118.8, 118.9, 123.3, 128.2, 129.7, 131.0, 153.4, 156.4, 157.0, 171.3 ppm; MS (ESI, m/z): 298 (M + H)<sup>+</sup>; Anal. calcd for C<sub>17</sub>H<sub>15</sub>NO<sub>4</sub>: C, 68.68; H, 5.09; N, 4.71. Found: C, 68.73; H, 5.10; N, 4.72.

### **3-(benzyloxy)benzoic acid (3q-1)**

Following the **General Procedure F** (eluent: EtOAc/PE 1: 5), the reaction starting from 3-hydroxybenzoic acid afford **3q-1** (342 mg; yield: 75%) as white crystals, mp: 131.2–133.5 °C; IR (film)<sub>v<sub>max</sub></sub>: 3087, 2917, 2849, 1681, 1603, 1587, 1452 cm<sup>-1</sup>; <sup>1</sup>H NMR (400 MHz, CDCl<sub>3</sub>) δ 5.11 (s, 2 H), 7.21–7.24 (m, 1 H), 7.33–7.36 (m, 1 H), 7.38–7.41 (m, 3 H), 7.44 (d, J = 7.2 Hz, 2 H), 7.73 (d, J = 7.2 Hz, 2 H) ppm; <sup>13</sup>C NMR (100 MHz, CDCl<sub>3</sub>) δ 70.2, 115.5, 121.2, 122.9, 127.5, 128.1, 128.6, 129.6, 130.6, 136.4, 158.8, 172.1 ppm; MS (ESI, m/z): 229 (M + H)<sup>+</sup>; Anal. calcd for C<sub>17</sub>H<sub>15</sub>NO<sub>4</sub>: C, 73.67; H, 5.30. Found: C, 73.90; H, 5.29.

### **3-(3-(benzyloxy)benzoyl)oxazolidin-2-one (3q)**

Following the **General Procedure E** (eluent: EtOAc/PE 1: 5), the imidation of 3-(benzyloxy)benzoic acid with oxazolidin-2-one afford **3q** (82 mg; yield: 55%) as white crystals, mp: 142.1–143.3 °C; IR (film)<sub>v<sub>max</sub></sub>: 2916, 2849, 1785, 1679, 1634, 1579, 1436, 1383, 1325, 1244, 1217, 1196, 1145, 1098, 1037 cm<sup>-1</sup>; <sup>1</sup>H NMR (400 MHz, CDCl<sub>3</sub>) δ 4.16 (t, J = 7.6 Hz, 2 H), 4.48 (t, J = 7.6 Hz, 2 H), 5.08 (s, 2 H), 7.14–7.44 (m, 9 H) ppm; <sup>13</sup>C NMR (100 MHz, CDCl<sub>3</sub>) δ 43.7, 62.2, 70.3, 115.1, 119.3, 121.7, 127.6, 128.1, 128.6, 129.0, 133.9, 136.5, 153.1, 158.3, 169.5 ppm; MS (ESI, m/z): 298 (M + H)<sup>+</sup>; Anal. calcd for C<sub>17</sub>H<sub>15</sub>NO<sub>4</sub>: C, 68.68; H, 5.09; N, 4.71. Found: C, 68.81; H, 5.11; N, 4.71.

### **3-(2-(3-(benzyloxy)phenyl) acetyl)oxazolidin-2-one (3r)**

Following the **General Procedure E** (eluent: EtOAc/PE 1: 5), the imidation of 2-(3-(benzyloxy)phenyl)acetic acid with oxazolidin-2-one afford **3r** (76 mg; yield: 49%) as white wax; IR (film)<sub>v<sub>max</sub></sub>: 2916, 2849, 1777, 1698, 1583, 1489, 1449, 1387, 1365, 1272, 1224, 1158, 1109, 1039 cm<sup>-1</sup>; <sup>1</sup>H NMR (400 MHz, CDCl<sub>3</sub>) δ 3.97 (t, J = 8.1 Hz, 2 H), 4.25 (s, 2 H), 4.35 (t, J = 8.1 Hz, 2 H), 5.04 (s, 2 H), 6.88 (d, J = 7.9 Hz, 1 H), 6.91 (d, J = 7.9 Hz, 1 H), 6.96 (s, 1H), 7.22 (dd, J = 7.9, 7.9 Hz, 1 H), 7.30 (dd, J = 7.2, 7.2 Hz, 1 H), 7.37 (dd, J = 7.2, 7.2 Hz, 2 H), 7.42 (d, J = 7.2 Hz, 2 H) ppm; <sup>13</sup>C NMR (100 MHz, CDCl<sub>3</sub>) δ 41.0, 42.6, 61.9, 69.9, 113.7, 116.2, 122.3, 127.5, 127.9, 128.5, 129.5, 135.0, 137.0, 153.4, 158.9, 171.0 ppm; MS (ESI, m/z): 312 (M + H)<sup>+</sup>; Anal. calcd for C<sub>18</sub>H<sub>17</sub>NO<sub>4</sub>: C, 69.44; H, 5.50; N, 4.50. Found: C, 69.20; H, 5.49; N, 4.51.

### **2-(4-(benzyloxy)phenyl) acetic acid (3s-1)**

Following the **General Procedure F** (eluent: EtOAc/PE 1: 5), the reaction starting from 2-(4-hydroxyphenyl)acetic acid afford **3s-1** (300 mg; yield: 62%) as white crystals, mp: 123.6–124.2°C; IR (film) $\nu_{\max}$ : 3087, 2917, 2849, 1688, 1513, 1452, 1249, 1014  $\text{cm}^{-1}$ ;  $^1\text{H}$  NMR (400 MHz,  $\text{CDCl}_3$ )  $\delta$  3.54 (s, 2 H), 5.00 (s, 2 H), 6.91 (d,  $J$  = 8.4 Hz, 2 H), 7.14 (d,  $J$  = 8.4 Hz, 2 H), 7.27–7.31 (m, 1 H), 7.33–7.40 (m, 4 H), 10.99 (s, 1 H) ppm;  $^{13}\text{C}$  NMR (100 MHz,  $\text{CDCl}_3$ )  $\delta$  40.1, 69.9, 114.9, 125.5, 127.4, 127.9, 128.5, 130.4, 136.9, 158.0, 178.4 ppm; MS (ESI,  $m/z$ ): 243 ( $M + H$ ) $^+$ ; Anal. calcd for  $\text{C}_{17}\text{H}_{15}\text{NO}_4$ : C, 74.36; H, 5.82. Found: C, 74.62; H, 5.81.

### **3-(2-(4-(benzyloxy)phenyl)acetyl)oxazolidin-2-one (3s)**

Following the **General Procedure E** (eluent: EtOAc/PE 1: 5), the imidation of 2-(4-(benzyloxy)phenyl)acetic acid with oxazolidin-2-one afford **3s** (77 mg; yield: 50%) as white crystals, mp: 108.4–110.5 °C; IR (film) $\nu_{\max}$ : 2916, 2849, 1777, 1698, 1607, 1511, 1387, 1365, 1240, 1177, 1111, 1040, 1016  $\text{cm}^{-1}$ ;  $^1\text{H}$  NMR (400 MHz,  $\text{CDCl}_3$ )  $\delta$  3.96 (t,  $J$  = 8.0 Hz, 2 H), 4.20 (s, 2 H), 4.33 (t,  $J$  = 8.0 Hz, 2 H), 5.03 (s, 2 H), 6.92 (d,  $J$  = 8.4 Hz, 2 H), 7.22 (d,  $J$  = 8.4 Hz, 2 H), 7.30 (t,  $J$  = 7.2 Hz, 1 H), 7.35–7.42 (m, 4 H) ppm;  $^{13}\text{C}$  NMR (100 MHz,  $\text{CDCl}_3$ )  $\delta$  40.1, 42.6, 61.9, 69.9, 114.8, 125.8, 127.4, 127.9, 128.5, 130.7, 136.9, 153.4, 157.9, 171.5 ppm; MS (ESI,  $m/z$ ): 312 ( $M + H$ ) $^+$ ; Anal. calcd for  $\text{C}_{18}\text{H}_{17}\text{NO}_4$ : C, 69.44; H, 5.50; N, 4.50. Found: C, 69.65; H, 5.51; N, 4.50.

## Supplementary Tables

**Table S1.** Inhibitory activities of compounds **1k–1u** towards NAAA and FAAH<sup>[a]</sup>

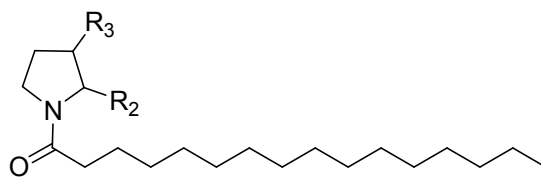

| Compound  | R <sub>2</sub>          | R <sub>3</sub>            | IC <sub>50</sub> of NAAA (μM) | IC <sub>50</sub> of FAAH (μM) |
|-----------|-------------------------|---------------------------|-------------------------------|-------------------------------|
| <b>1j</b> | -H                      | (R)-OH                    | > 100                         | > 100                         |
| <b>1k</b> | -H                      | (S)-OH                    | > 100                         | > 100                         |
| <b>1l</b> | -H                      | (R)-OMe                   | > 100                         | > 100                         |
| <b>1m</b> | -H                      | (S)-OMe                   | > 100                         | > 100                         |
| <b>1n</b> | -H                      | (R)/(S)-CN                | > 100                         | > 100                         |
| <b>1o</b> | -H                      | (R)/(S)-CONH <sub>2</sub> | > 100                         | > 100                         |
| <b>1p</b> | -H                      | = O                       | > 100                         | > 100                         |
| <b>1q</b> | (R)-CH <sub>2</sub> OH  | -H                        | > 100                         | > 100                         |
| <b>1r</b> | (S)-CH <sub>2</sub> OH  | -H                        | > 100                         | > 100                         |
| <b>1s</b> | (R)-CH <sub>2</sub> OMe | -H                        | > 100                         | > 100                         |
| <b>1t</b> | (S)-CH <sub>2</sub> OMe | -H                        | > 100                         | > 100                         |

<sup>[a]</sup>Data are presented as IC<sub>50</sub> ± standard error of the mean. All experiments were performed in triplicate.



**Table S2.** Inhibitory activities of compounds **3k–3s** towards NAAA and FAAH<sup>[a]</sup>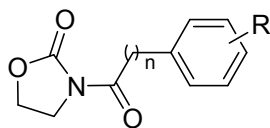

| Compound  | n | R     | IC <sub>50</sub> of NAAA (μM) | IC <sub>50</sub> of FAAH (μM) |
|-----------|---|-------|-------------------------------|-------------------------------|
| <b>3k</b> | 0 | 3-Ph  | >20                           | >20                           |
| <b>3l</b> | 1 | 3-Ph  | >20                           | >20                           |
| <b>3m</b> | 1 | 4-Ph  | >20                           | >20                           |
| <b>3n</b> | 0 | 3-OPh | >20                           | >20                           |
| <b>3o</b> | 1 | 3-OPh | >20                           | >20                           |
| <b>3p</b> | 1 | 4-OPh | >20                           | >20                           |
| <b>3q</b> | 0 | 3-OBn | >20                           | >20                           |
| <b>3r</b> | 1 | 3-OBn | >20                           | >20                           |
| <b>3s</b> | 1 | 4-OBn | >20                           | >20                           |

<sup>[a]</sup>Data are presented as IC<sub>50</sub> ± standard error of the mean. All experiments were performed in triplicate.

Table S3. Purity of the new synthesized compounds

| Compounds | HPLC purity | Compounds | HPLC purity |
|-----------|-------------|-----------|-------------|
| 1c        | 98.3%       | 3a        | 98.5%       |
| 1d        | 98.7%       | 3b        | 98.8%       |
| 1e        | 99.1%       | 3c        | 99.0%       |
| 1f        | 98.6%       | 3d        | 97.8%       |
| 1g        | 99.5%       | 3e        | 99.4%       |
| 1h        | 99.4%       | 3f        | 98.2%       |
| 1i        | 99.1%       | 3g        | 98.6%       |
| 2a        | 98.6%       | 3h        | 98.5%       |
| 2b        | 99.0%       | 3i        | 98.8%       |
| 2c        | 97.9%       | 3j        | 99.3%       |
| 2d        | 99.2%       |           |             |
| 2e        | 98.8%       |           |             |
| 2f        | 99.3%       |           |             |
| 2g        | 99.5%       |           |             |
| 2h        | 99.4%       |           |             |

Purity of each compound was determined on an Agilent 1200-HPLC system. Column: Hypersil Gold C18 column, 250 × 4.6 mm, 5 μm; flow rate: 0.75 mL/min, detection: UV at 220 and 254 nm; mobile phase: 10–98% acetonitrile/water and a 50–98% acetonitrile/water.

## Supplementary Figures

**Figure S1. Characterization of 2f as a reversible and noncompetitive NAAA inhibitor.**  
(A) Concentration-dependent inhibitory effects of **2f** on the human NAAA (closed circles); (B) Concentration-dependent inhibitory effects of **2f** on the recombinant rat NAAA-transfected HEK293 cells (open triangles).

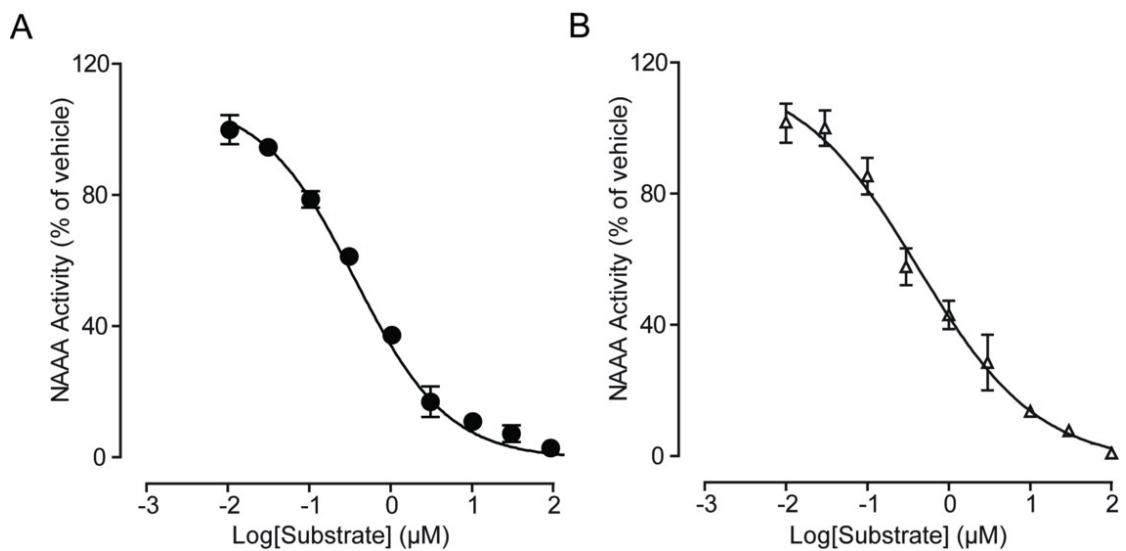

**Figure S2. Effects of NAAA inhibitor on body weight and food intake.** C57 mice were treated a single intragastric administration of vehicle (5% Tween 80 and 5% PEG 400 in saline, circle) or **2f** at 30 mg/kg/day (square), 100 mg/kg/day (triangle) for 30 and 10 days, respectively. Mice were housed in metabolic cages and monitored for body weight (A) and food intake (B). Body weight was expressed by Mean  $\pm$  SEM, and total food intake per day were recorded.

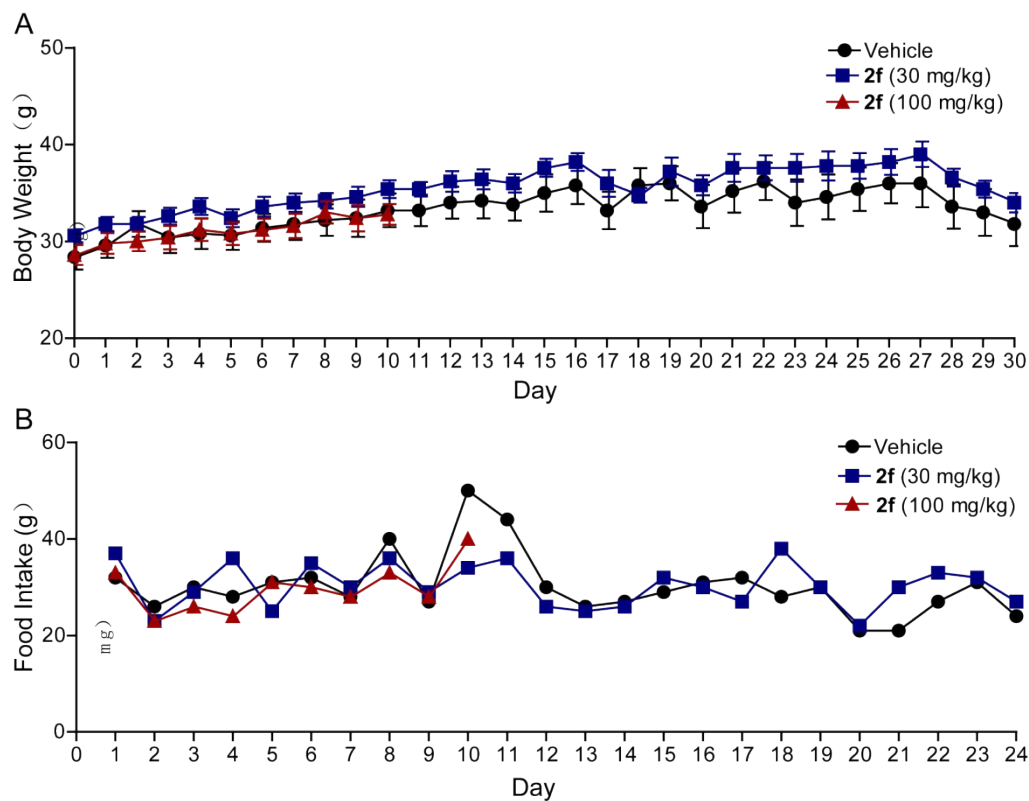

**Figure S3. Assessment of gastric mucosa injury caused by NAAA and COX inhibitors.**

The dual COX1/2 inhibitor indomethacin (20 mg/kg for 3 days) produced significant gastric distension (B), ulcer and hemorrhages (G), while the NAAA inhibitor **2f** (30 mg/kg for 30 days and 100 mg/kg for 10 days) did not induce the similar gastric toxicity (C, D, F). All compounds were administered intragastrically in saline containing 5% Tween 80 and 5% PEG 400.

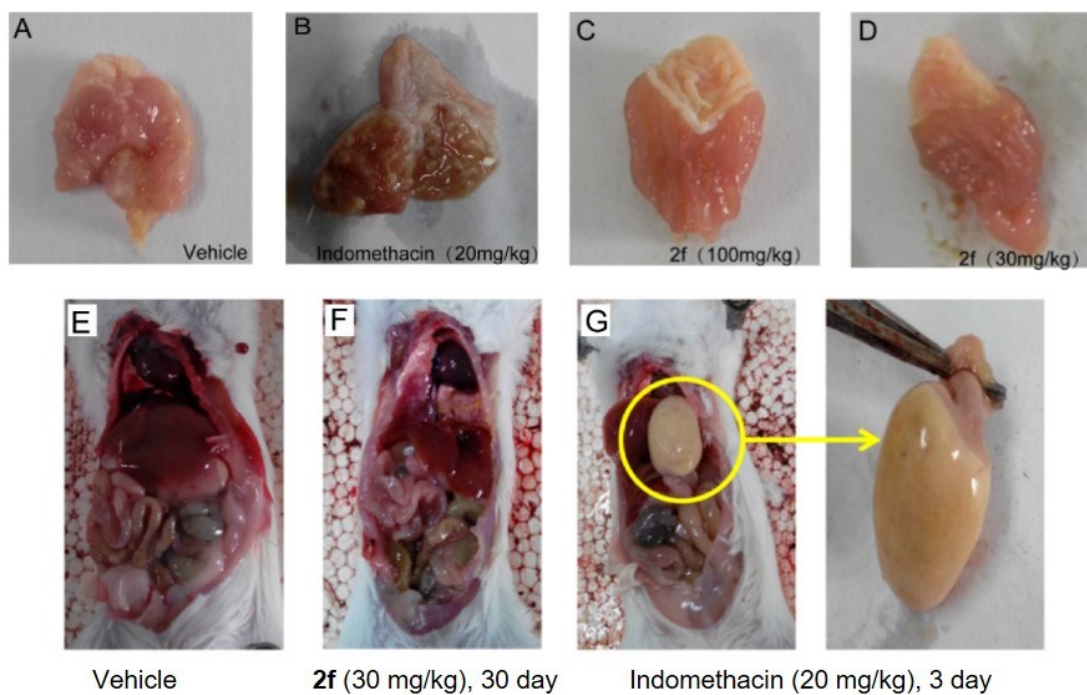

**Figure S4. The inhibition of hERG channels in CHO cells by 2f (A) and cisapride (B).**

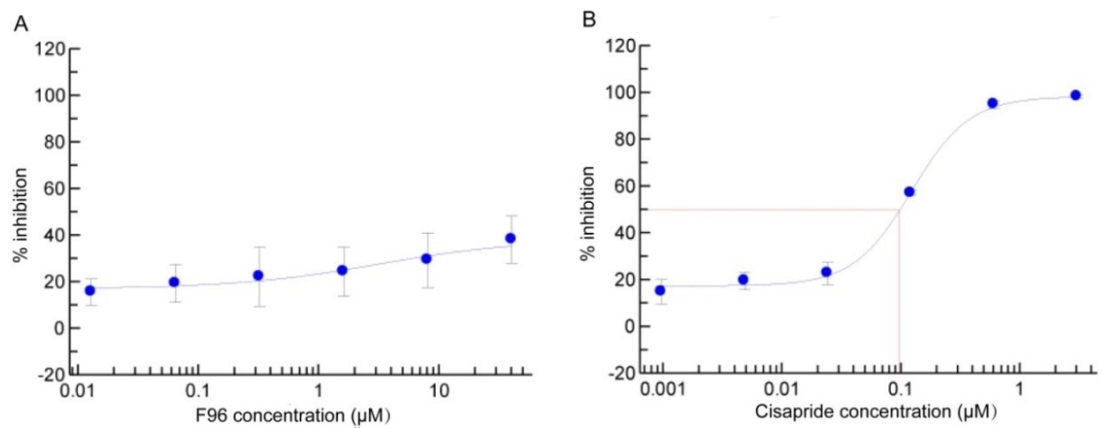

**Figure S5. <sup>1</sup>H and <sup>13</sup>C NMR spectra of compounds  
(R)-tert-butyl 1-palmitoylpyrrolidin-3-ylcarbamate (1c-1)**

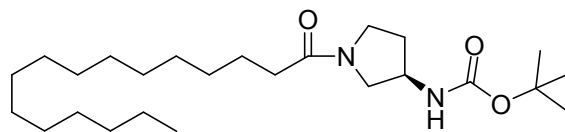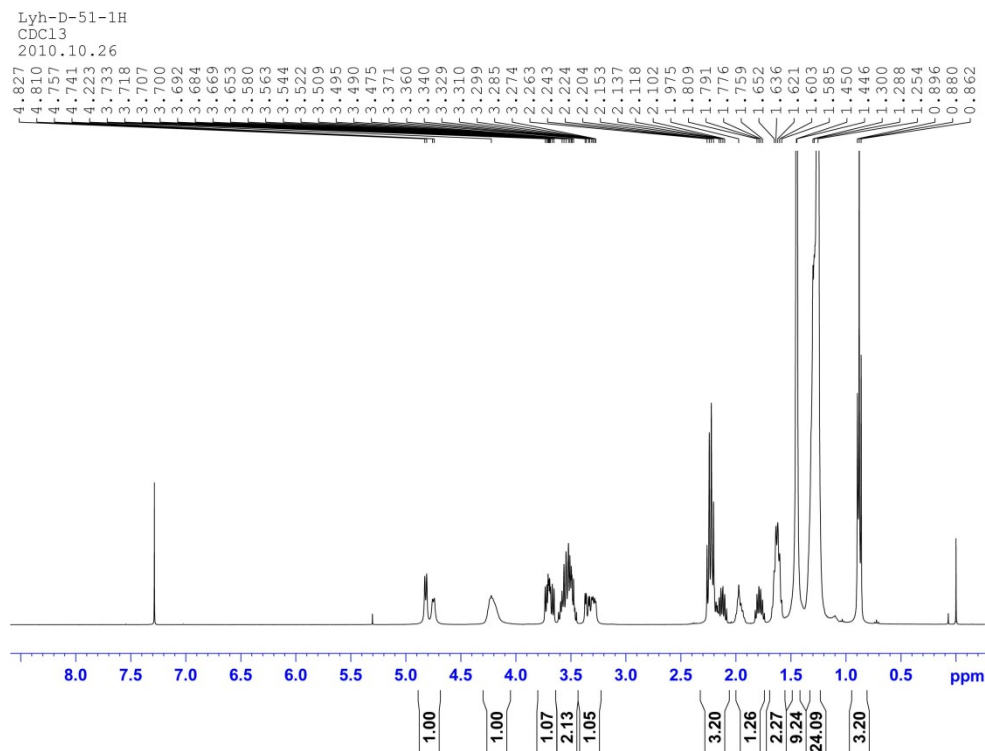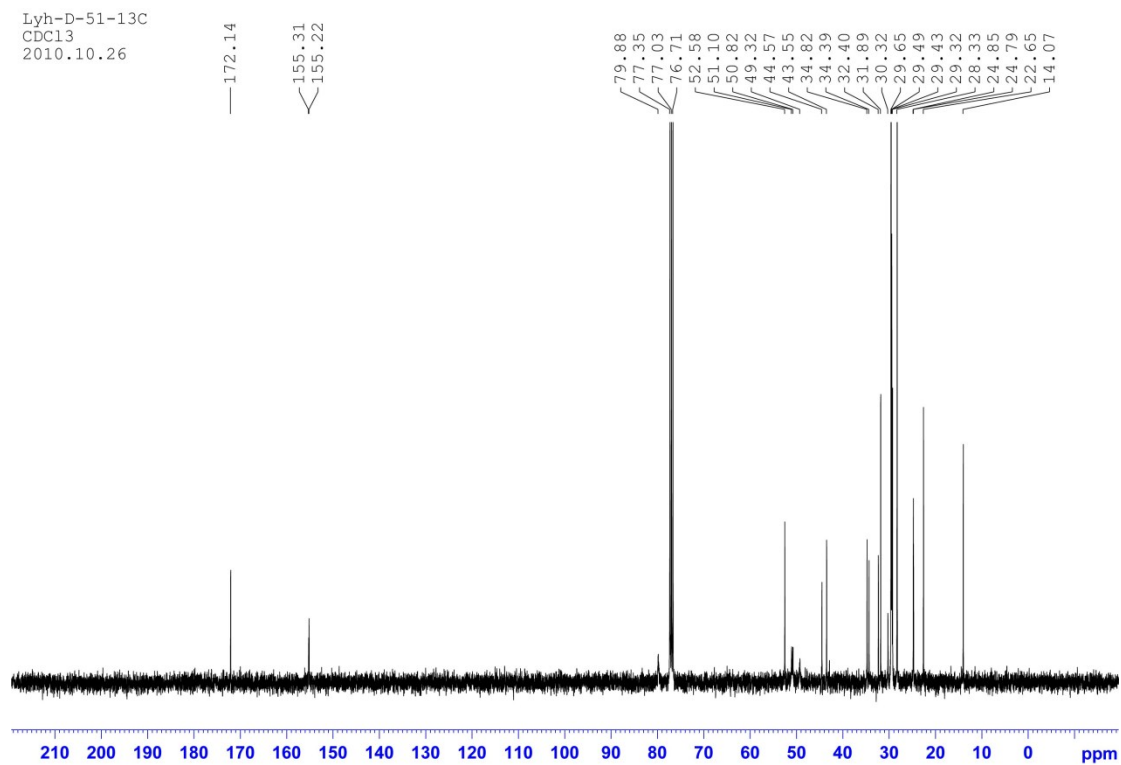

**(R)-1-(3-aminopyrrolidin-1-yl)hexadecan-1-one (1c)**

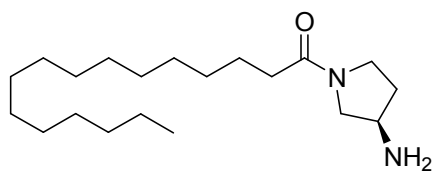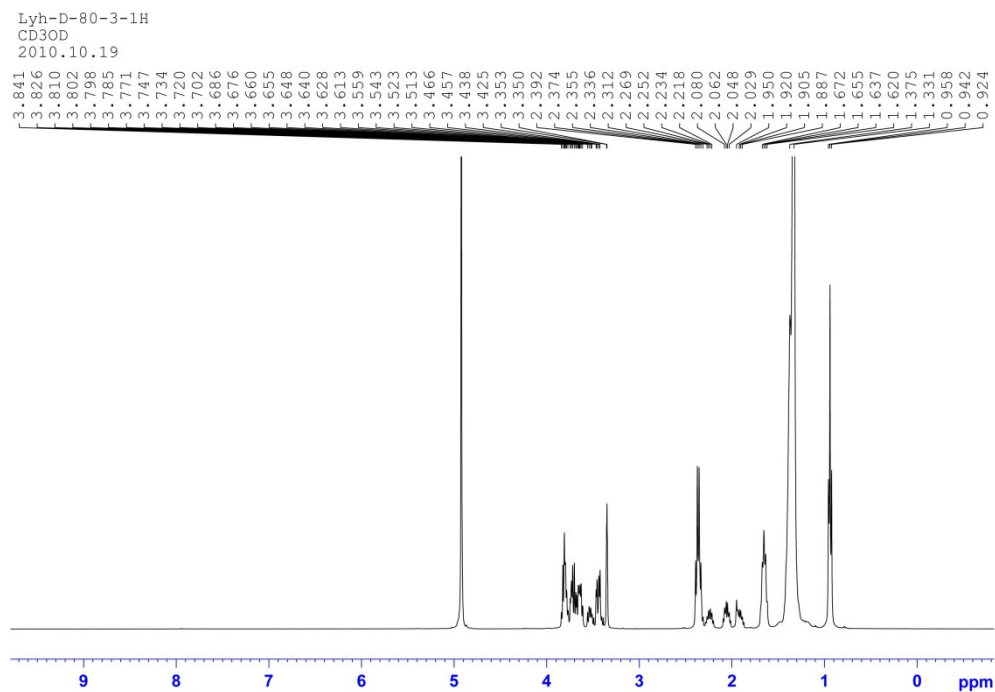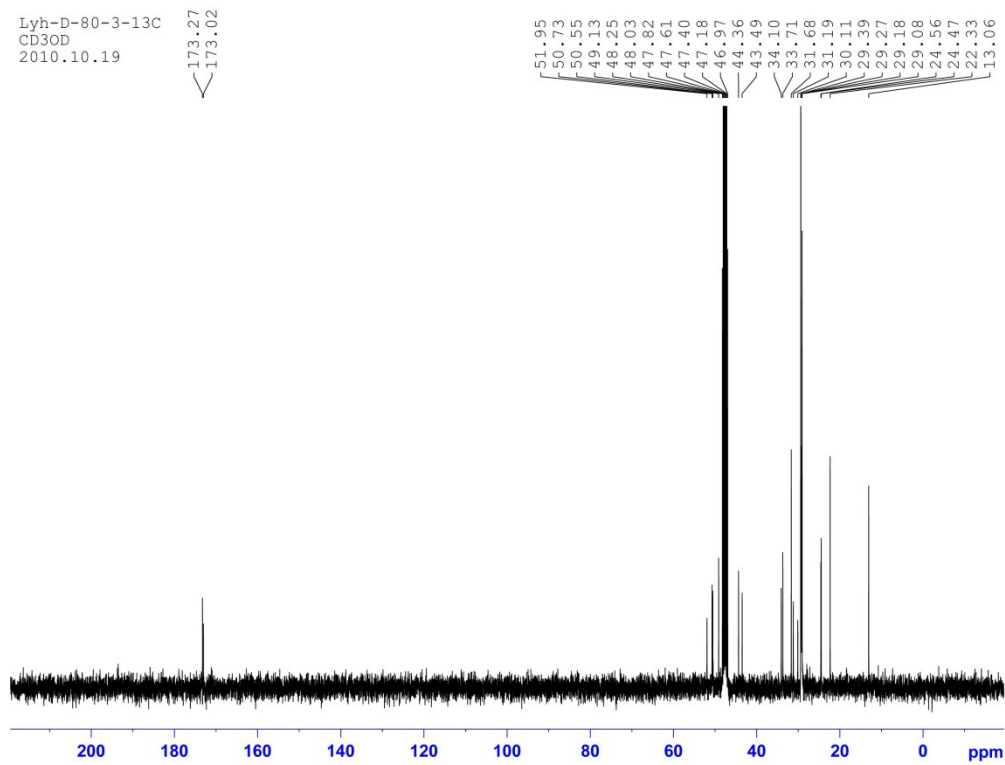



**(S)-tert-butyl 1-palmitoylpyrrolidin-3-ylcarbamate (1d-1)**

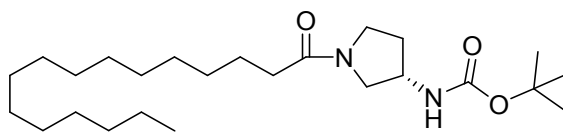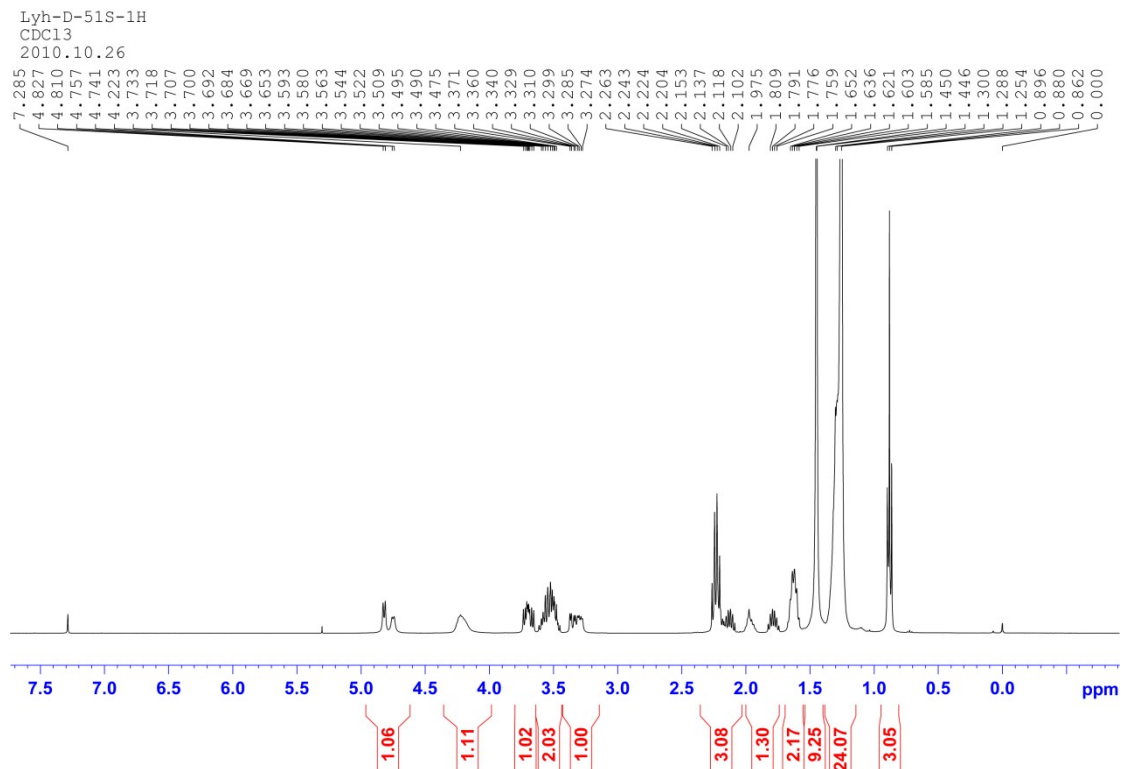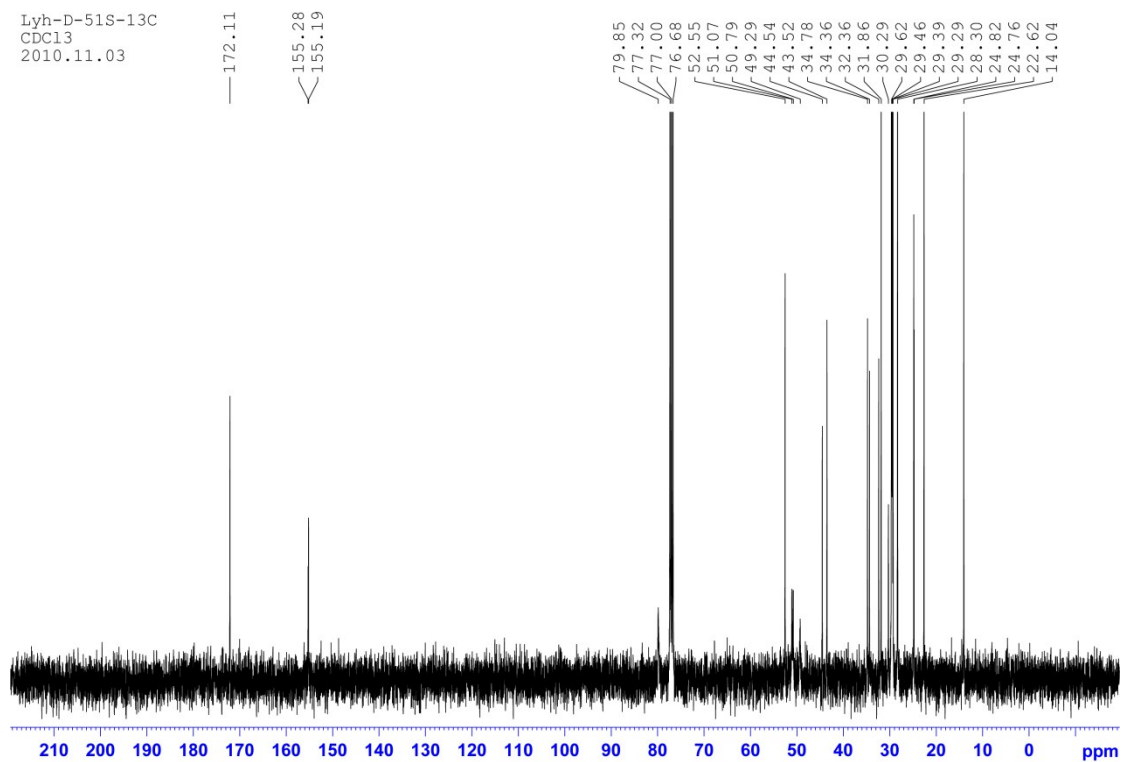

**(S)-1-(3-aminopyrrolidin-1-yl)hexadecan-1-one (1d)**

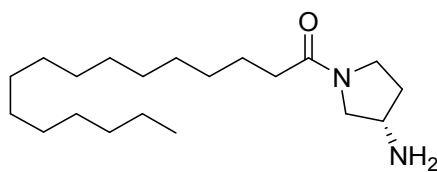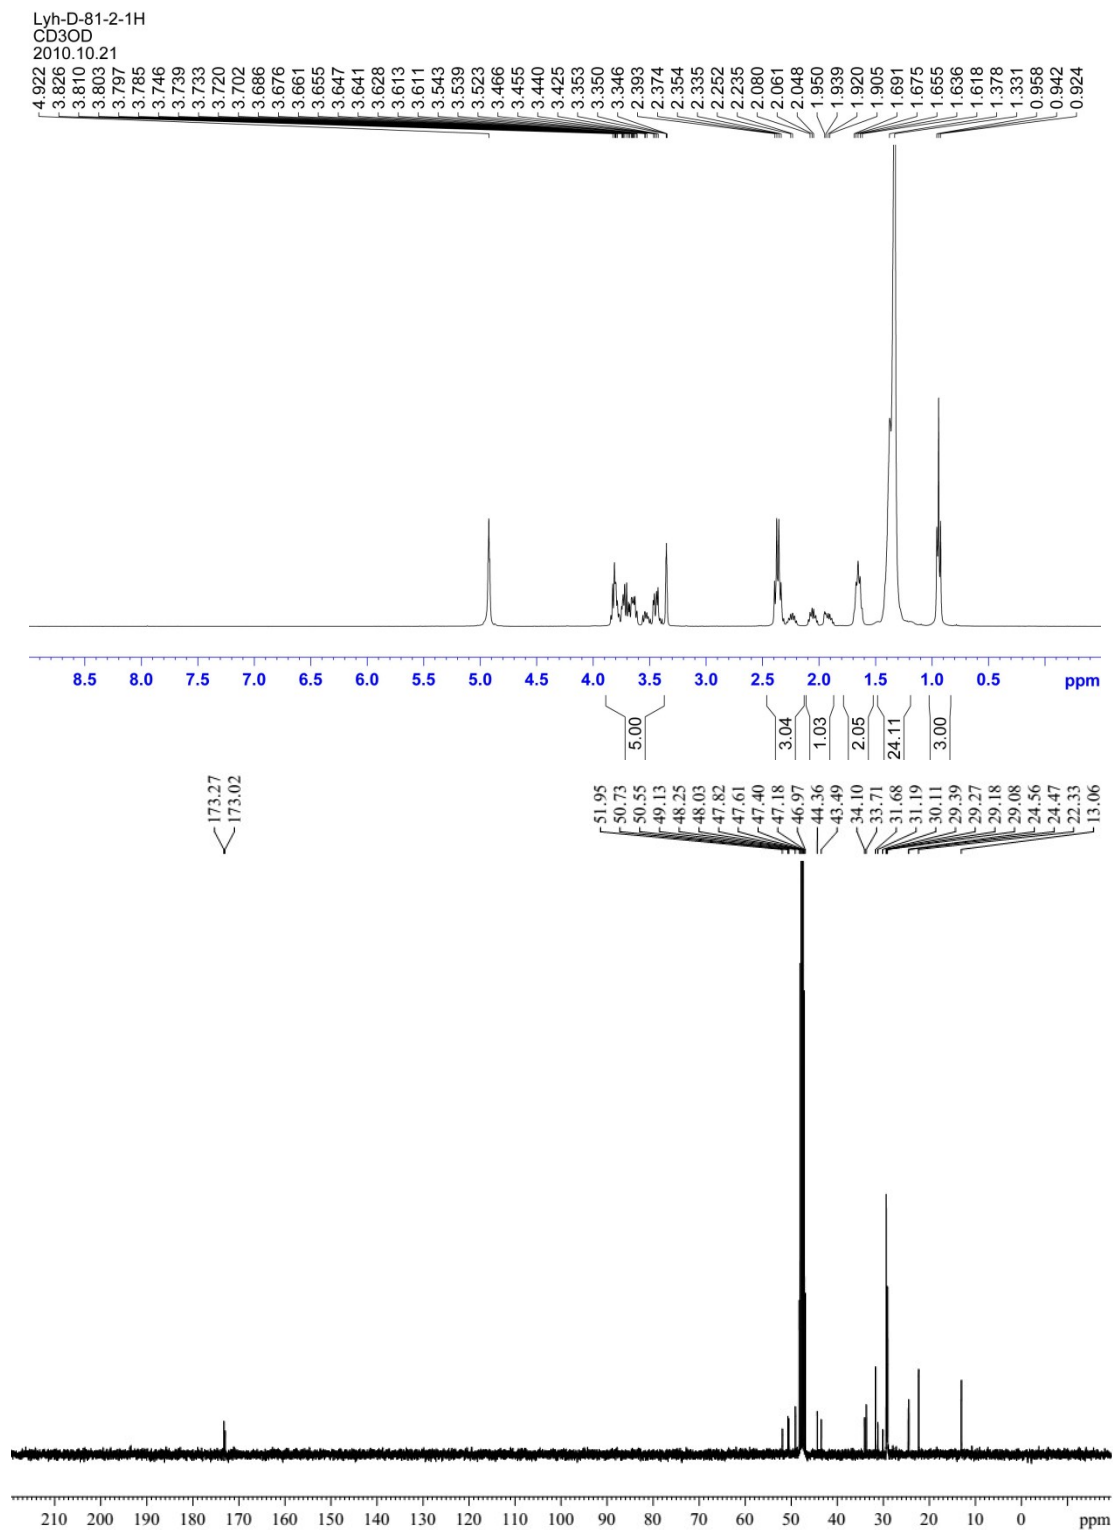

**(R)-1-(2-methylpyrrolidin-1-yl)hexadecan-1-one (1e)**

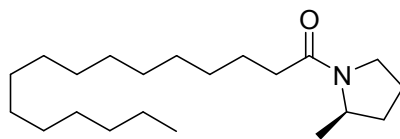

Lyh-E-3-1H  
CDC13  
2010.12.01

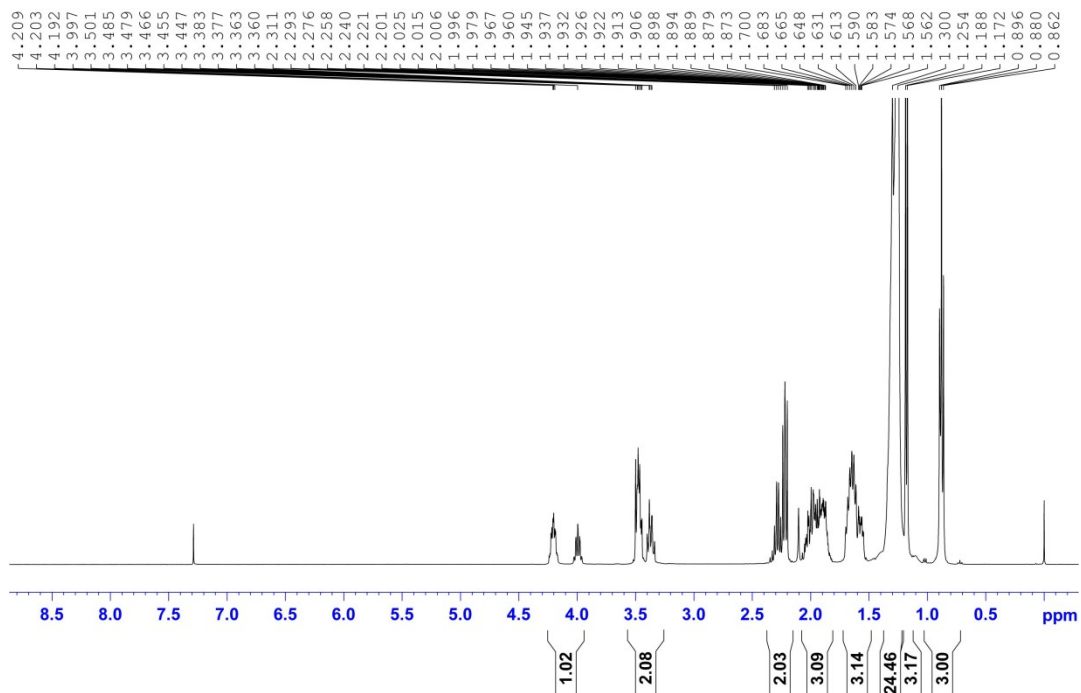

Lyh-E-3-13C  
CDC13  
2010.12.01

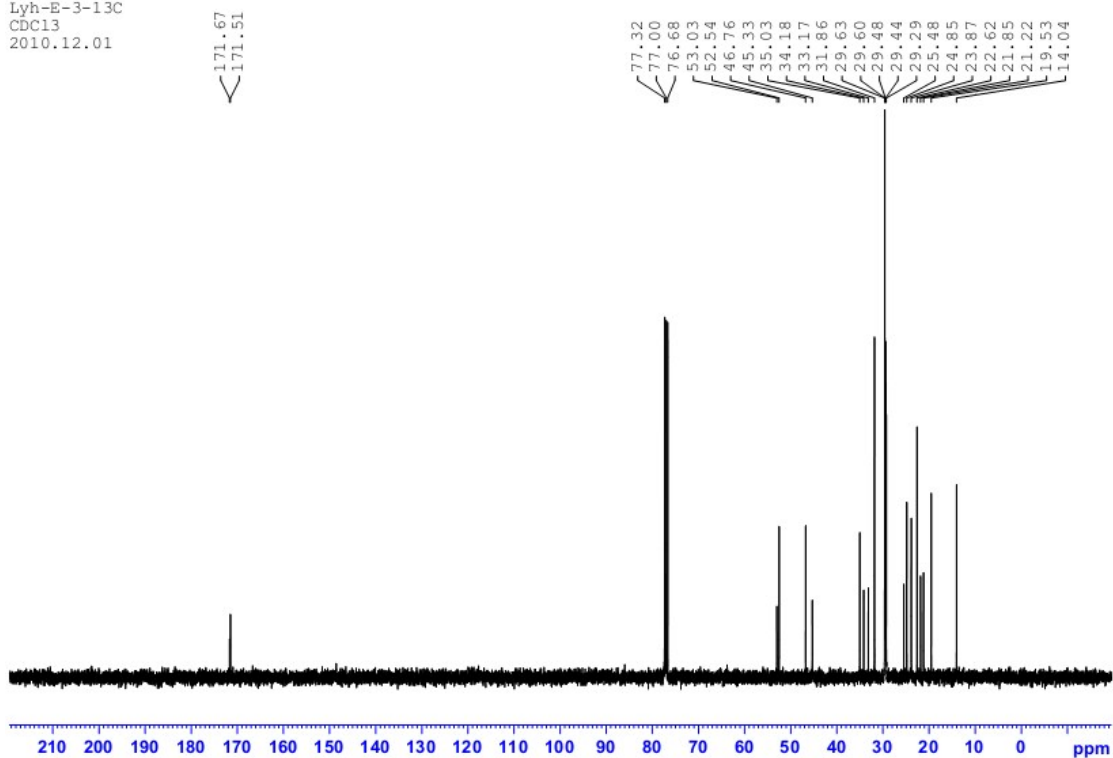

**(S)-1-(2-methylpyrrolidin-1-yl)hexadecan-1-one (1f)**

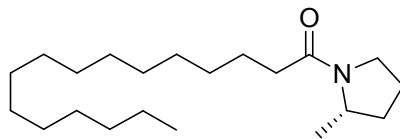

Lyh-E-4-1H  
CDCl3  
2010.12.05

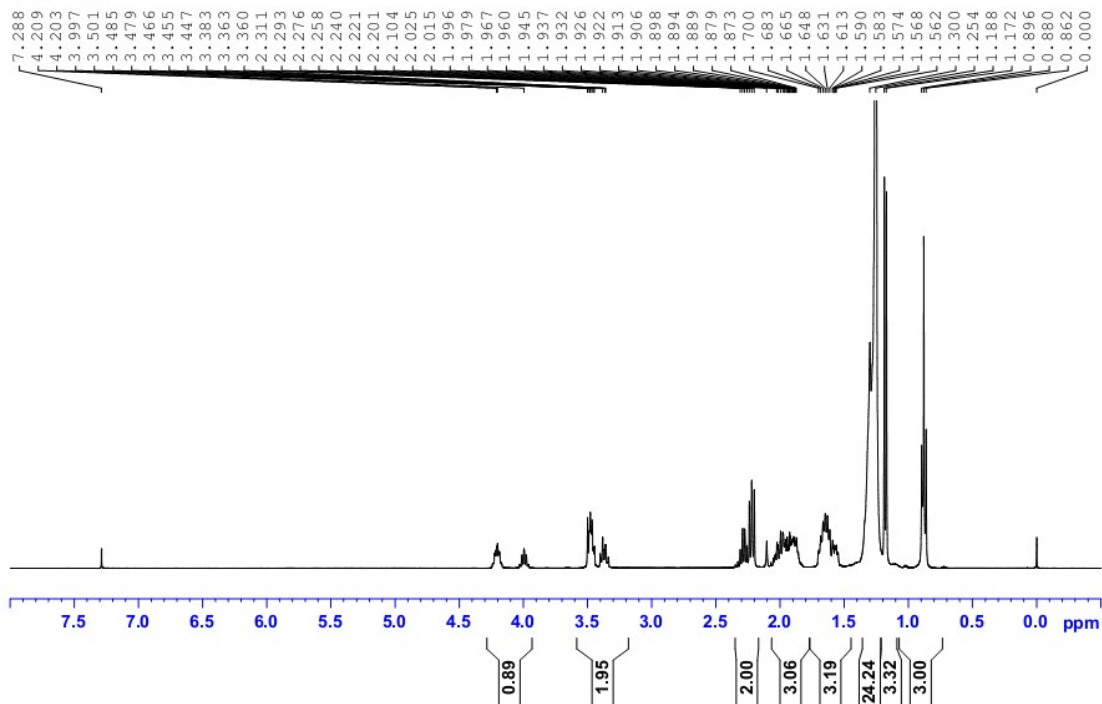

Lyh-E-4-13C  
CDCl3  
2010.12.05

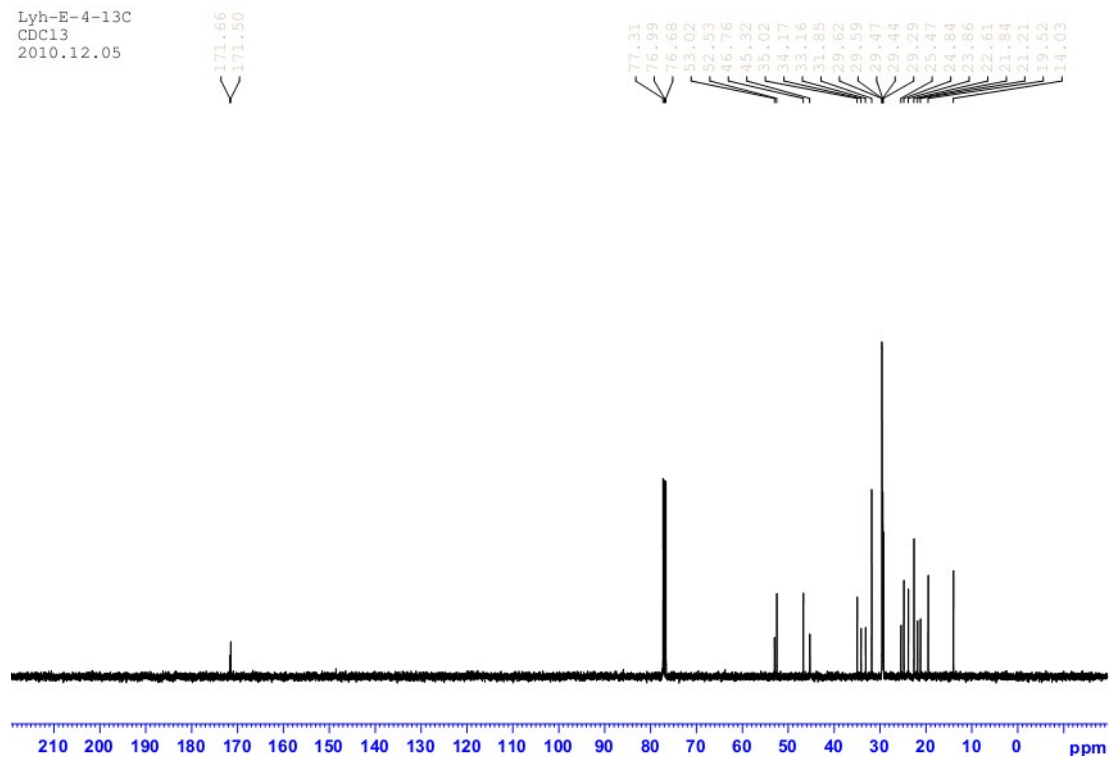

# 1-palmitoylpyrrolidin-2-one (1g)

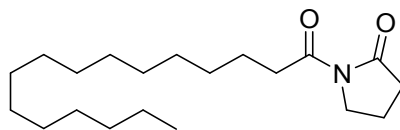

Lyh-E-154-1H  
 CDCl3  
 2011.6.8

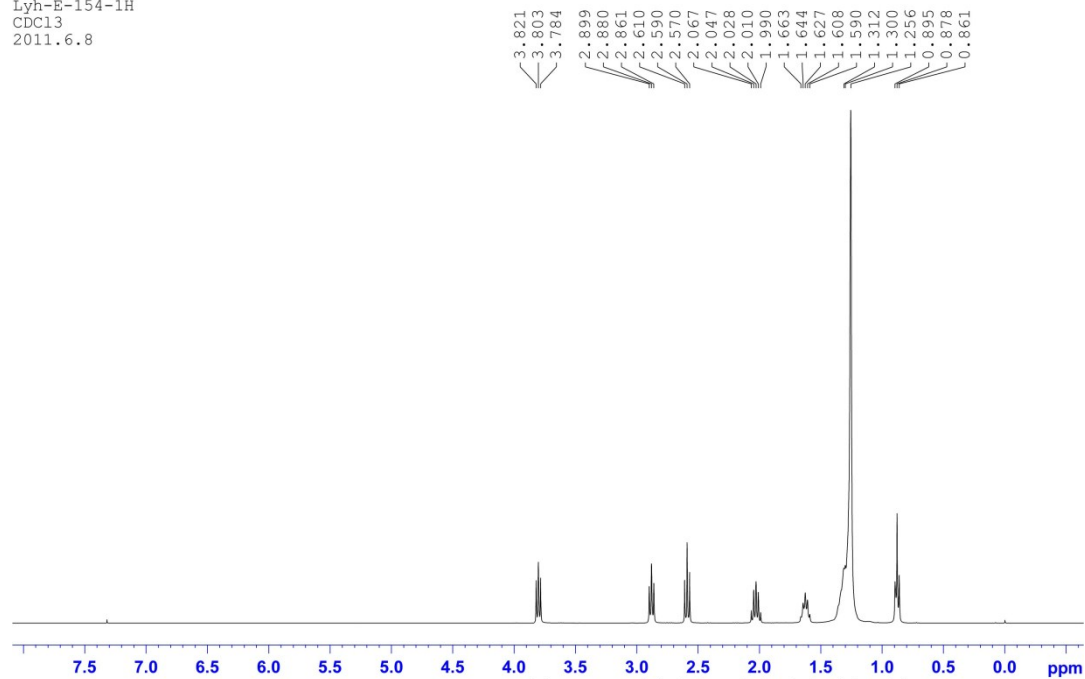

Lyh-E-154-13C  
 CDCl3  
 2011.6.8

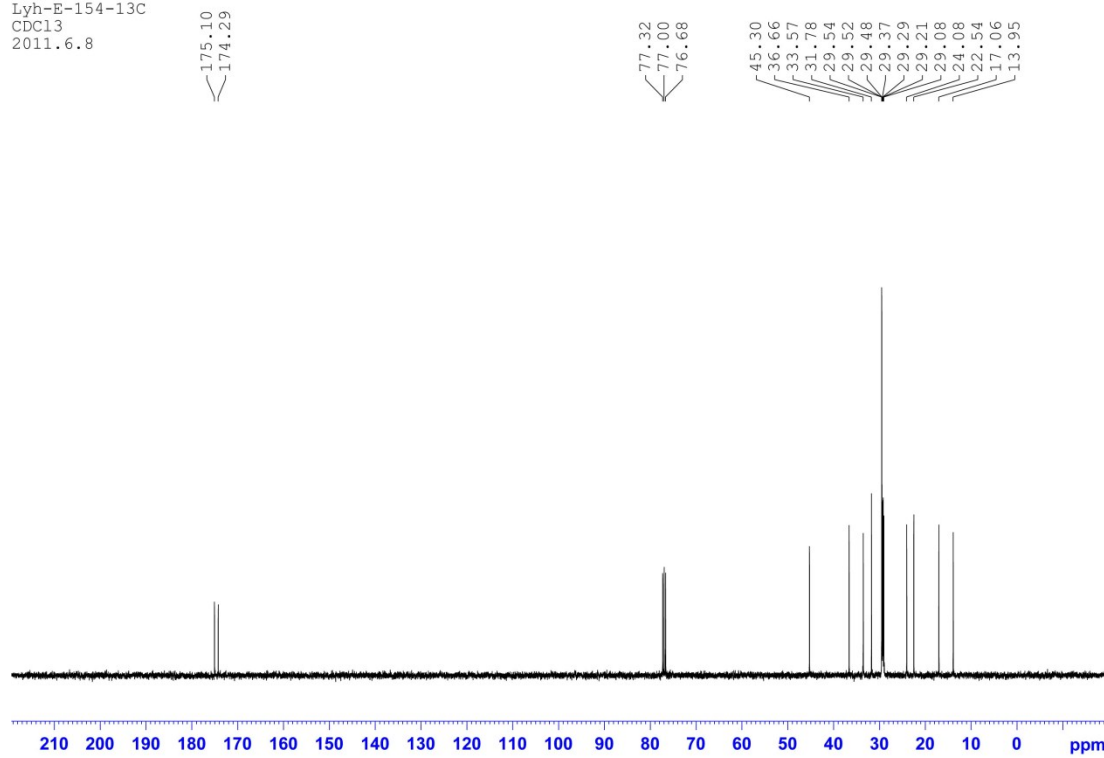

# 1-palmitoylimidazolidin-2-one (1h)

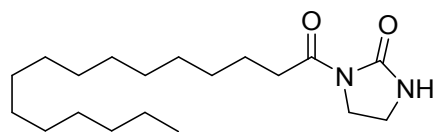

Lyh-F228-2-1H  
CDCl<sub>3</sub>  
13.4.27

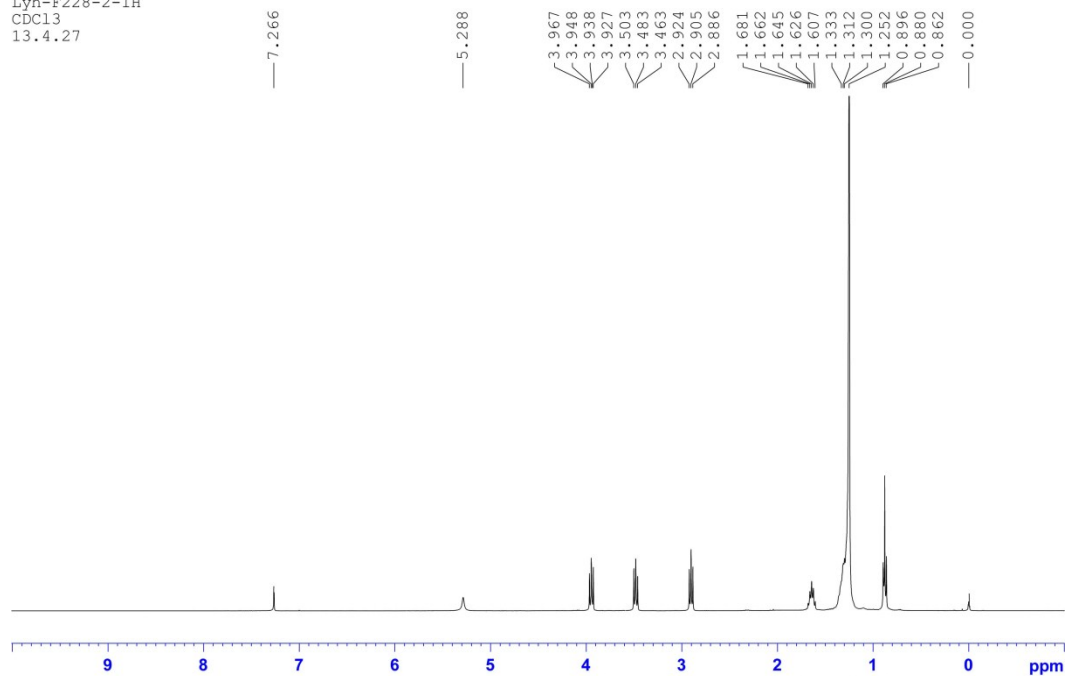

Lyh-F228-2-13C  
CDCl<sub>3</sub>  
13.4.27

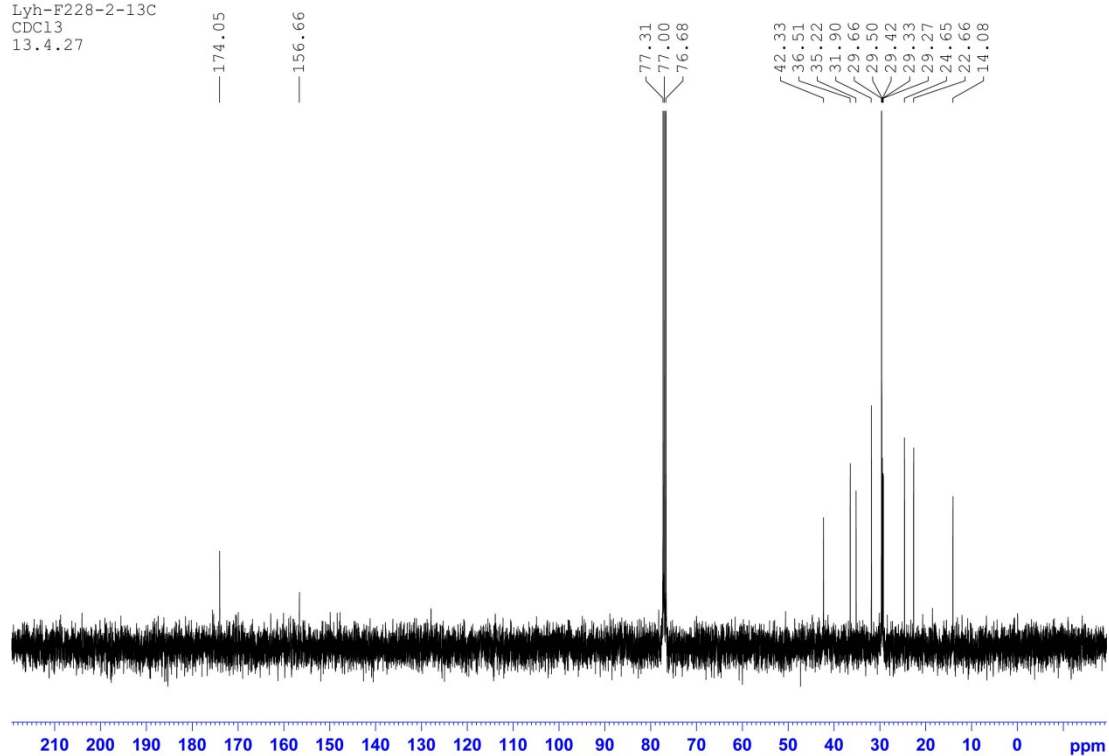

### 3-palmitoyloxazolidin-2-one (1i)

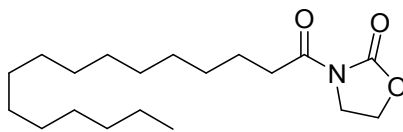

Lyh-E-153-1H  
 CDC13  
 2011.6.10

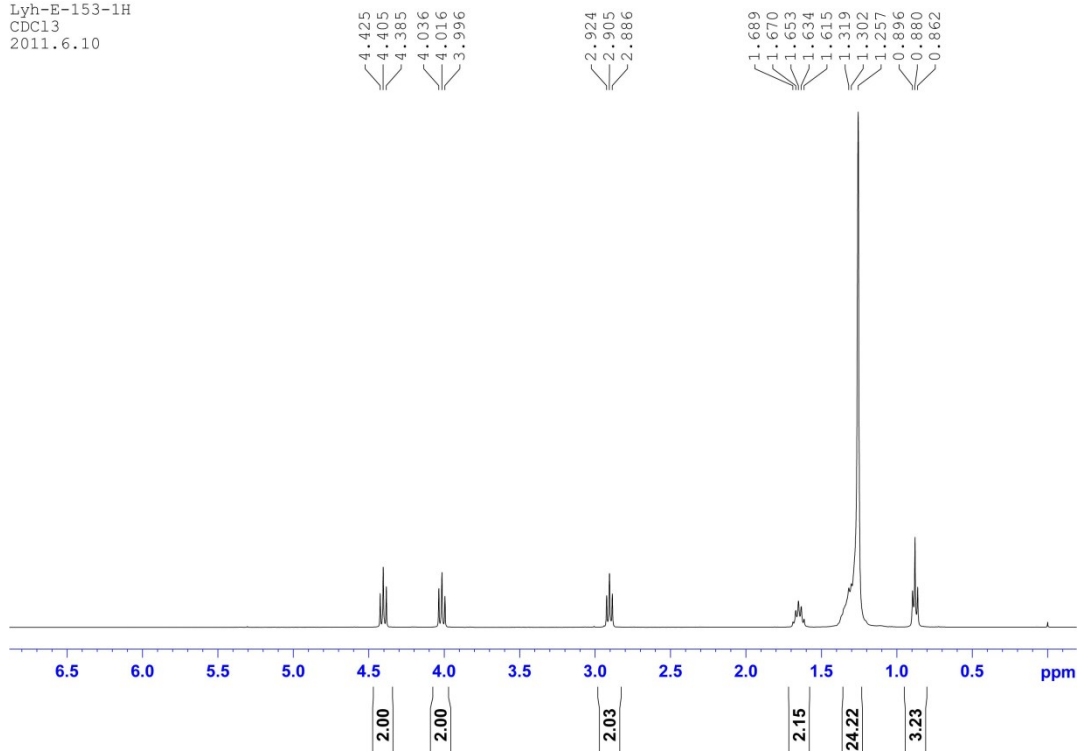

Lyh-E-153-13C  
 CDC13  
 2011.6.10

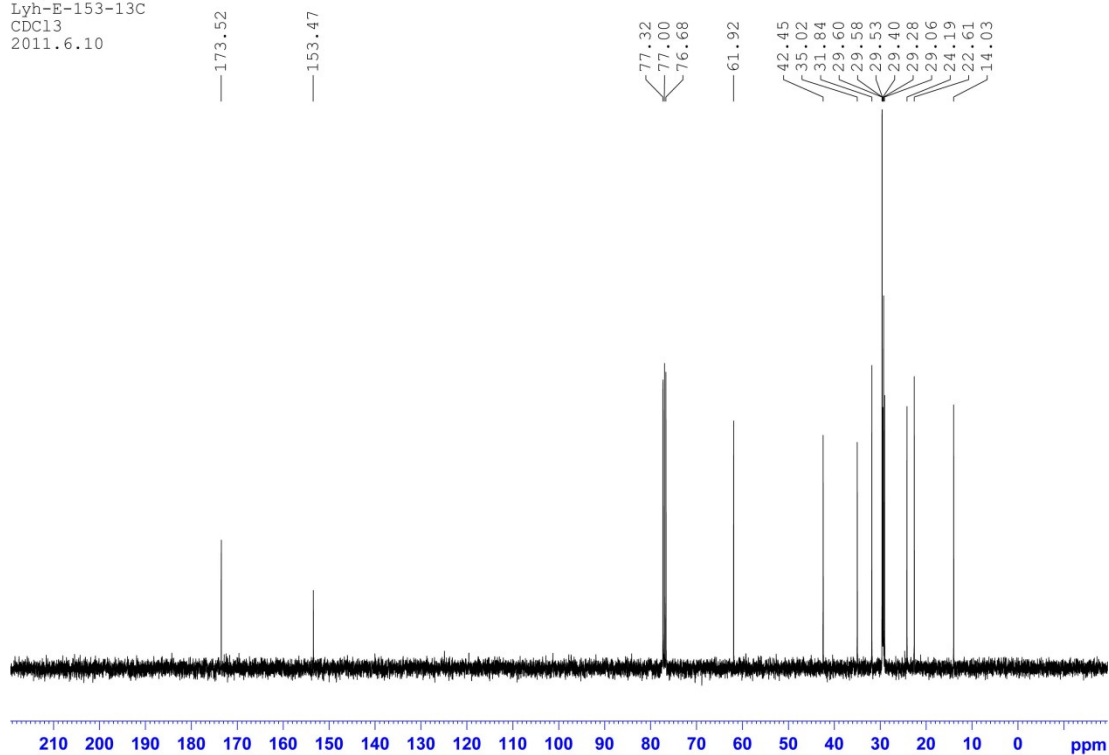

**(R)-1-(3-hydroxypyrrolidin-1-yl)hexadecan-1-one (1j)**

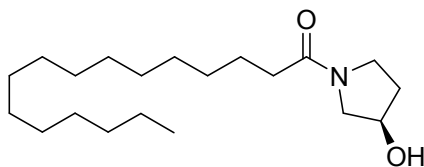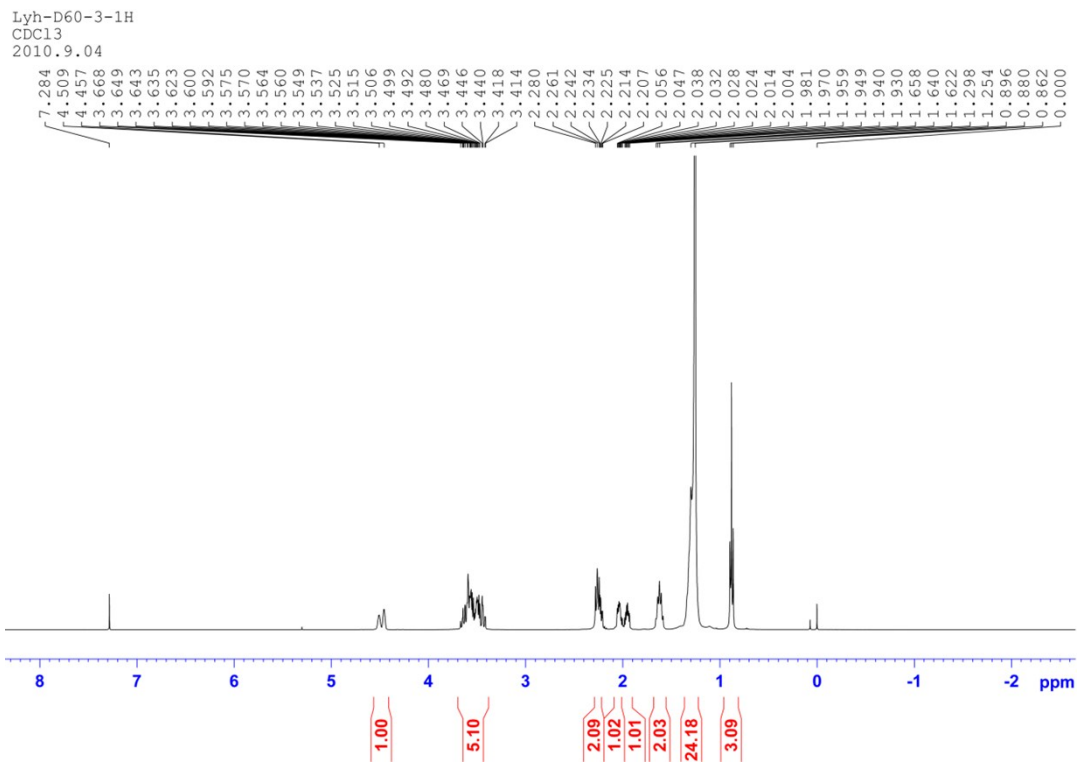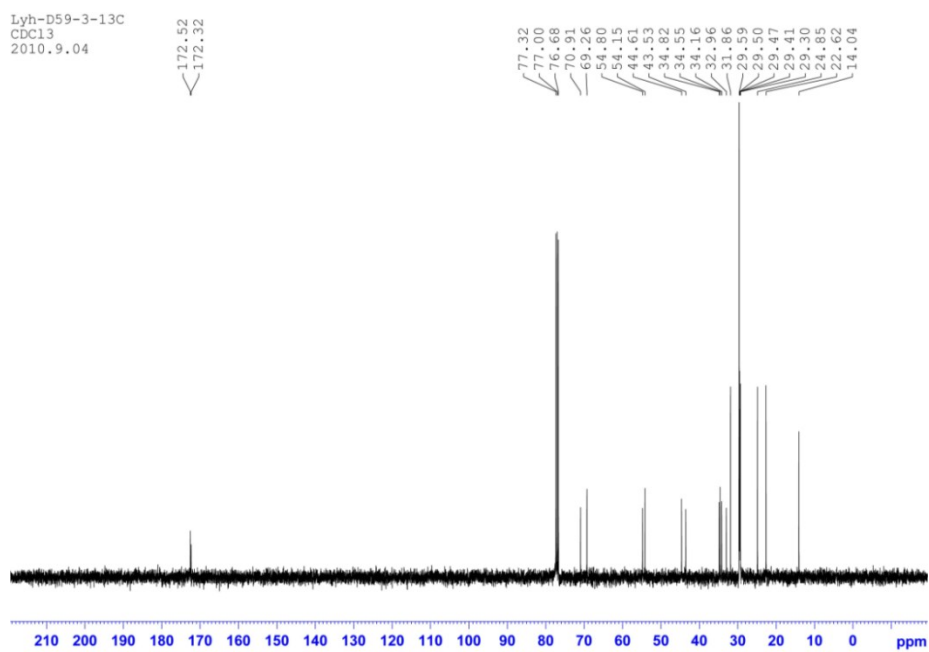



# (S)-1-(3-hydroxypyrrolidin-1-yl)hexadecan-1-one (1k)

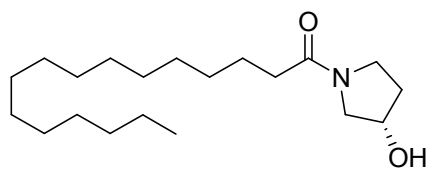

Lyh-D60-3-1H  
CDC13  
2010.9.04

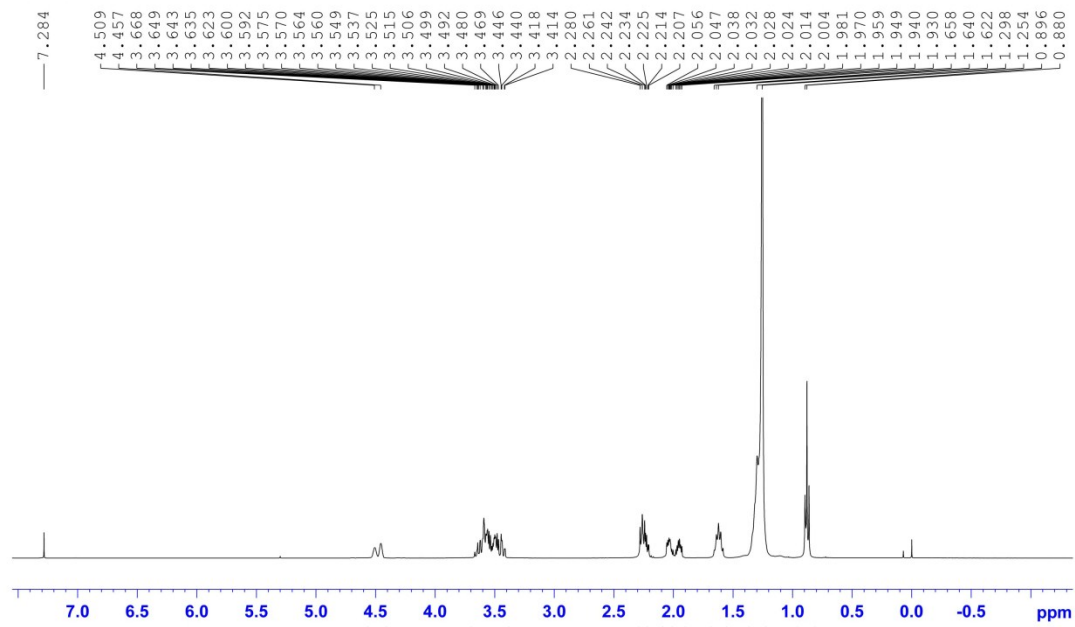

Lyh-D60-3-13C  
CDC13  
2010.9.04

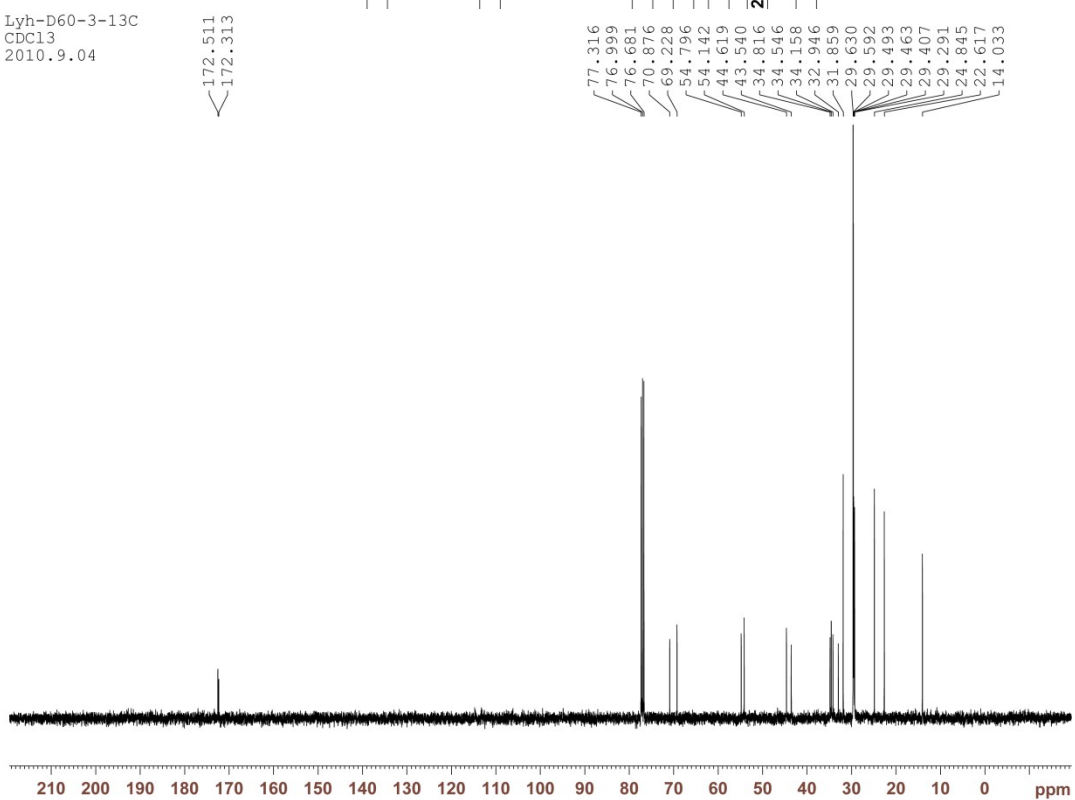

**(R)-1-(3-methoxypyrrolidin-1-yl)hexadecan-1-one (11)**

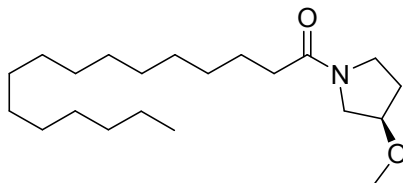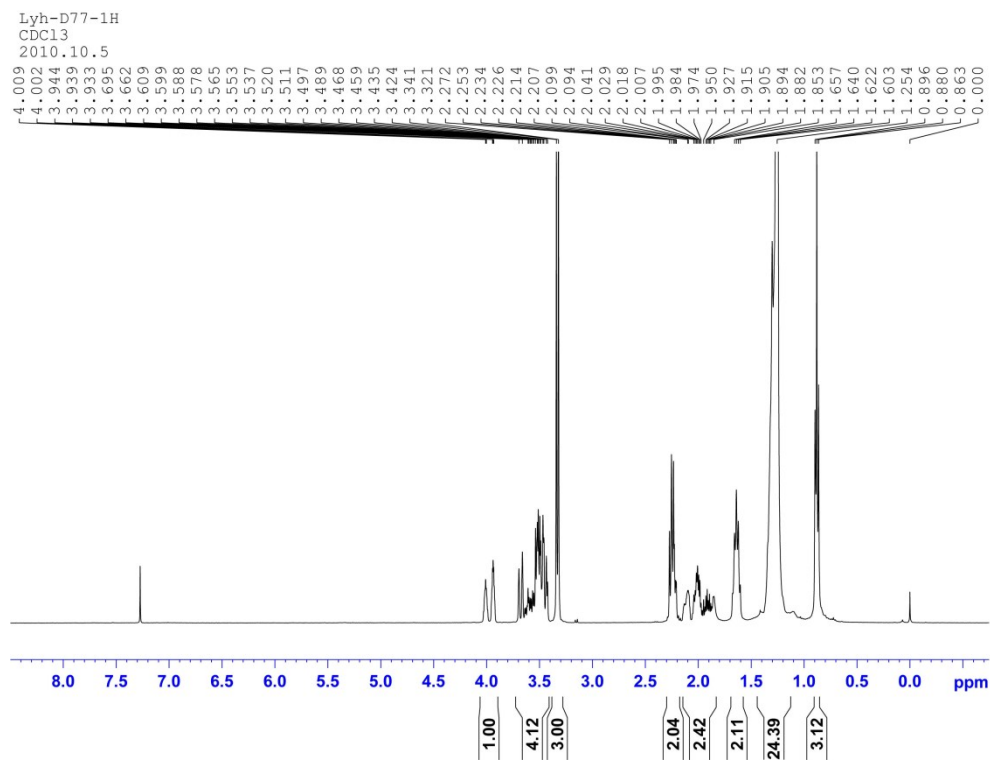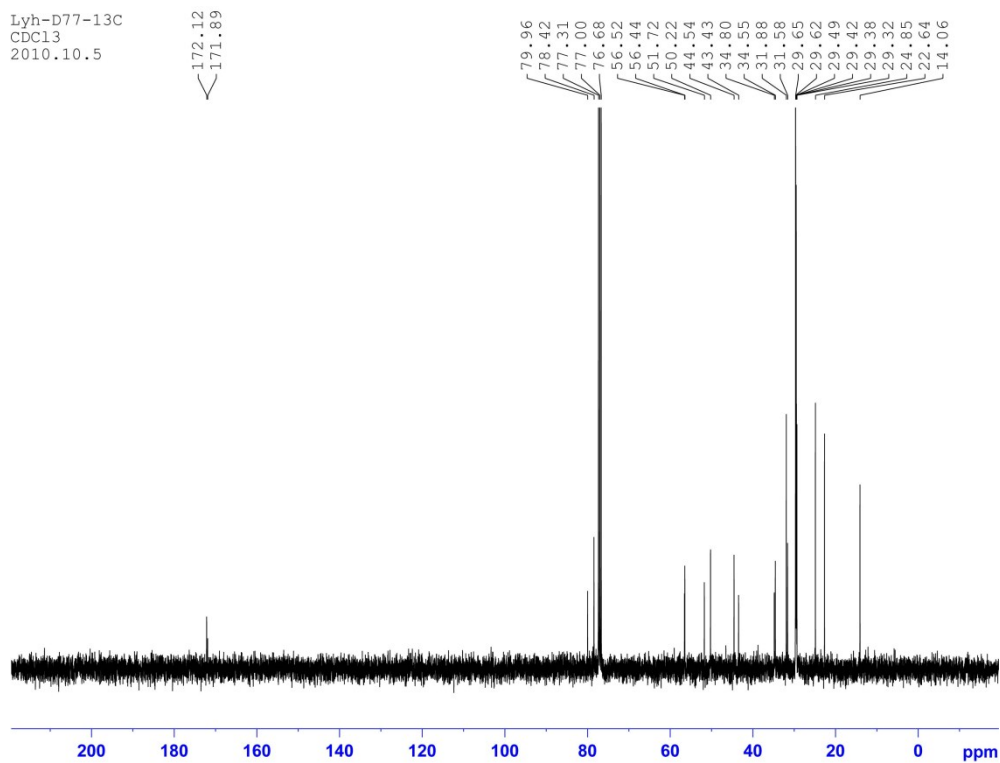

**(S)-1-(3-methoxypyrrolidin-1-yl)hexadecan-1-one (1m)**

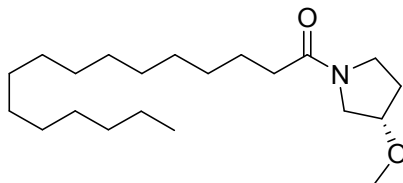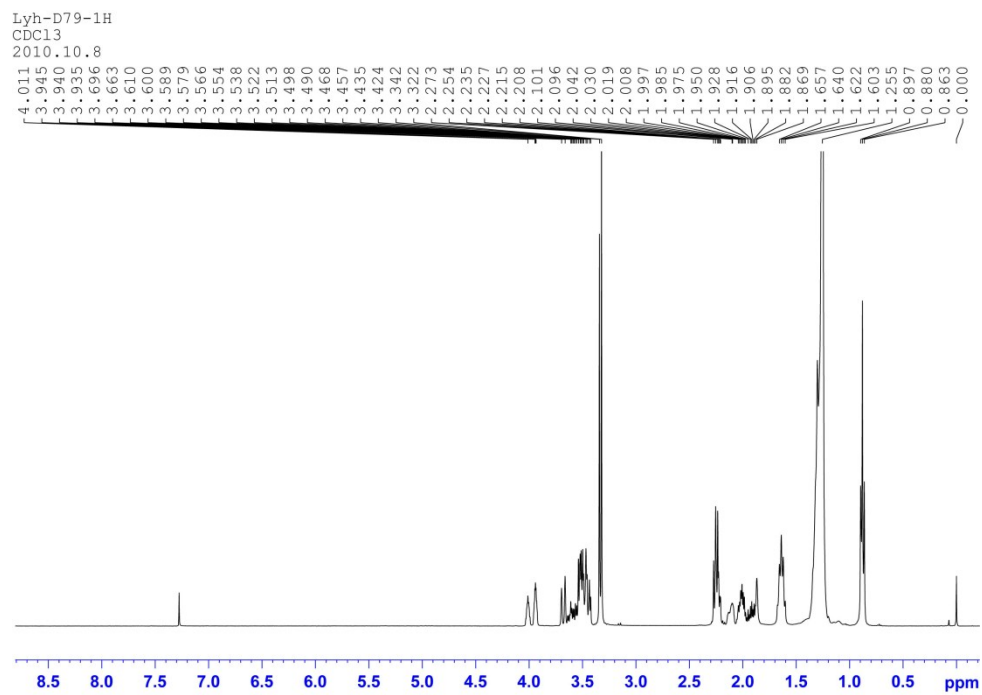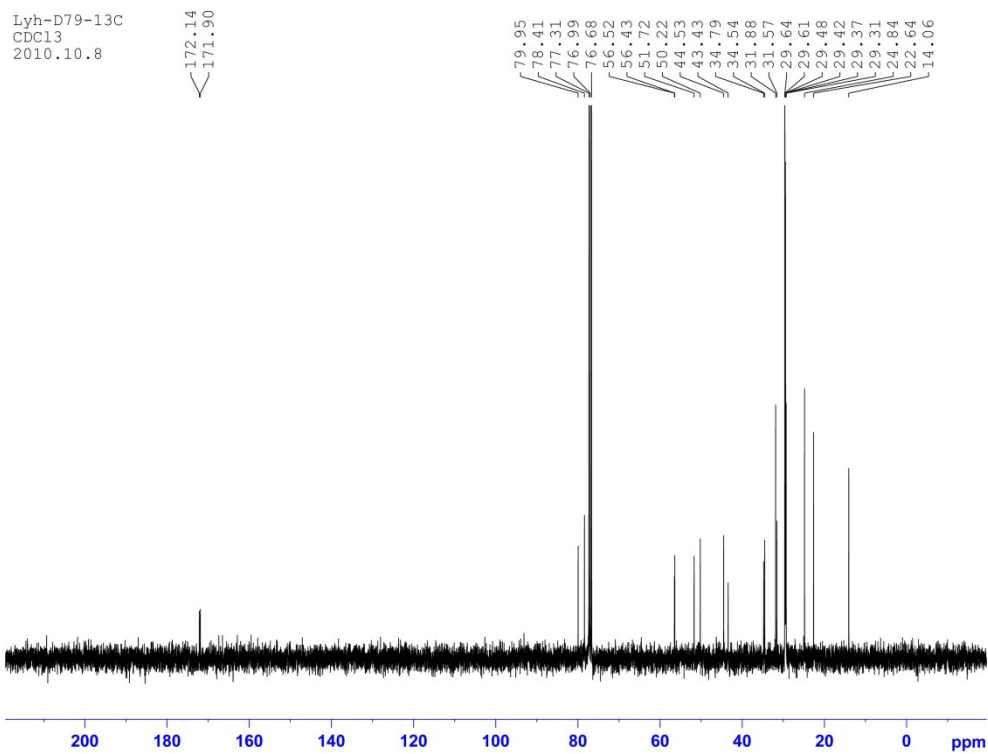

# 1-palmitoylpyrrolidine-3-carbonitrile (1n)

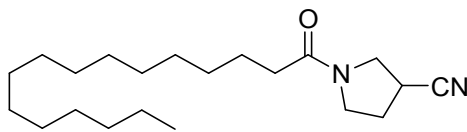

Lyh-D38-2-1H  
 CDC13  
 2010.10.8

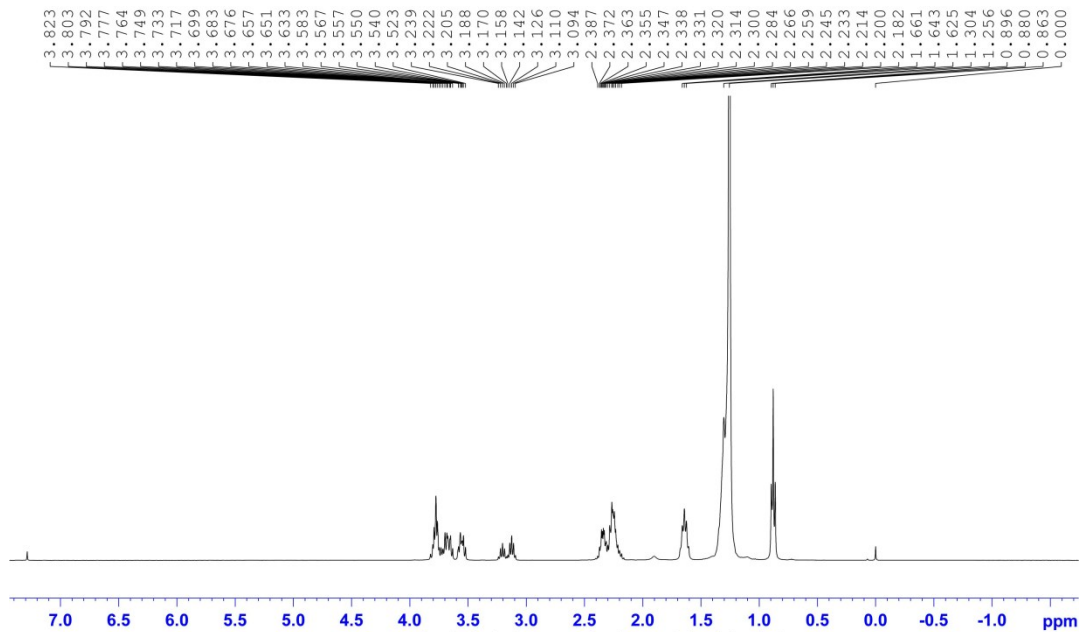

Lyh-D38-2-13C  
 CDC13  
 2010.10.8

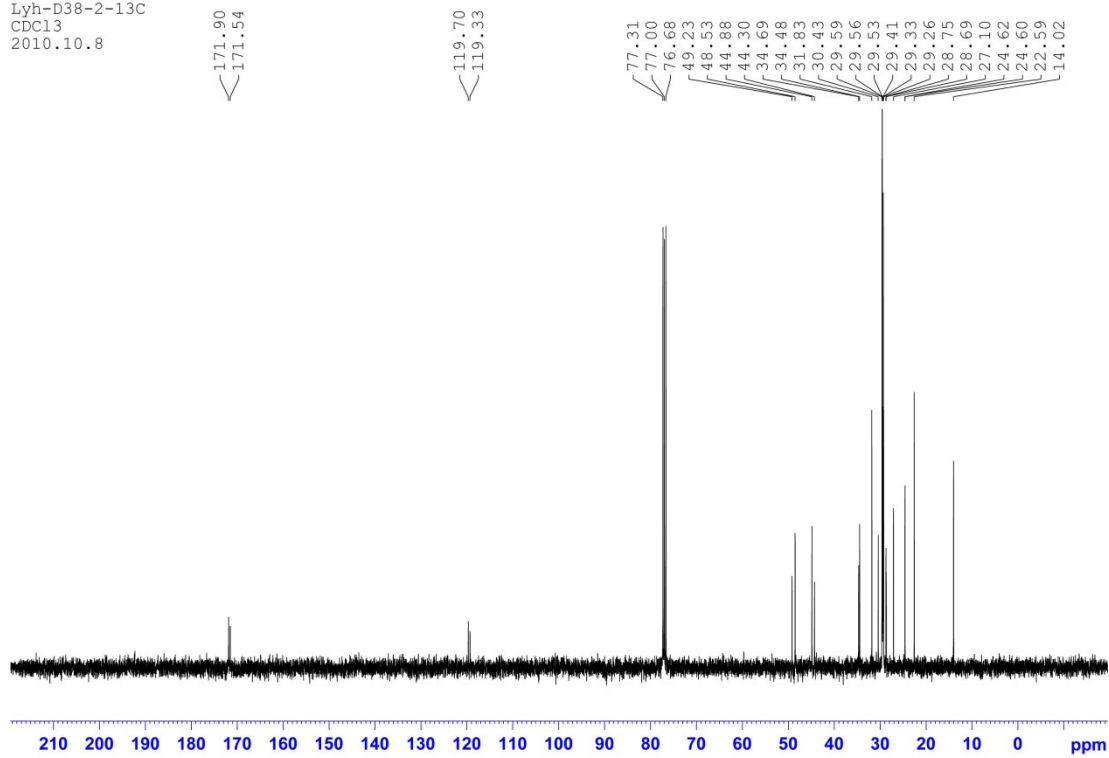

# 1-palmitoylpyrrolidine-3-carboxamide (1o)

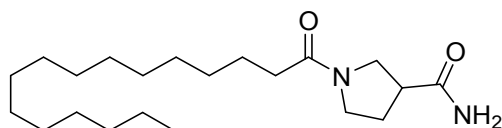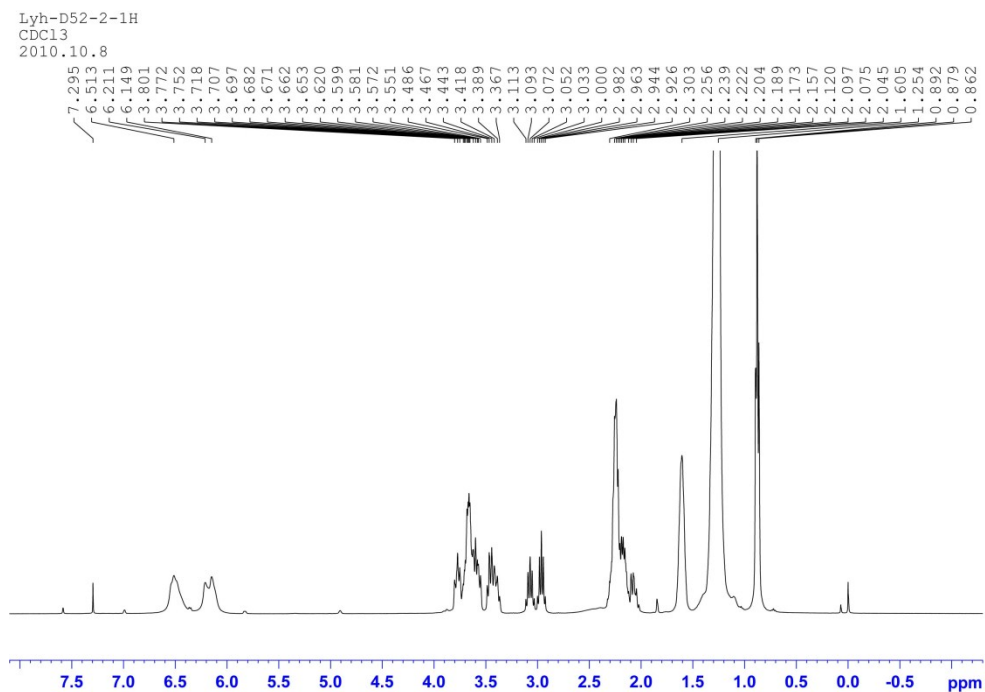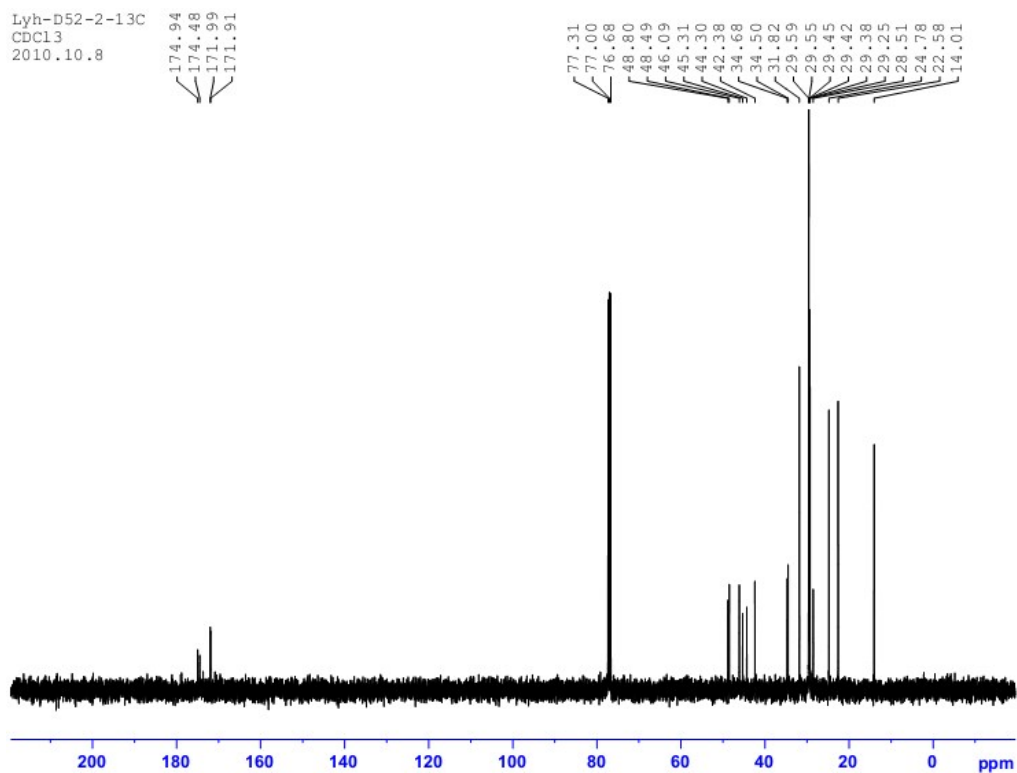

# 1-palmitoylpyrrolidin-3-one (1p)

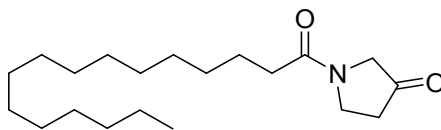

Lyh-D-86-1-1H  
CDC13  
2010.11.07

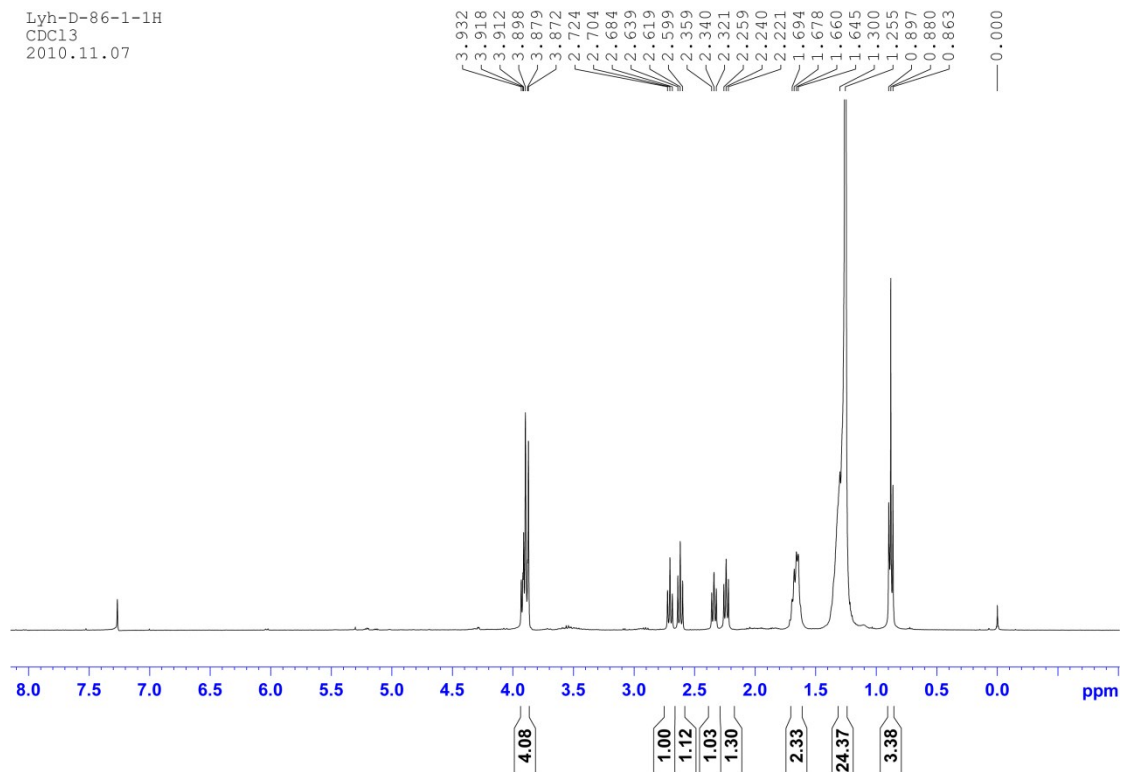

Lyh-D-86-1-13C  
CDC13  
2010.11.07

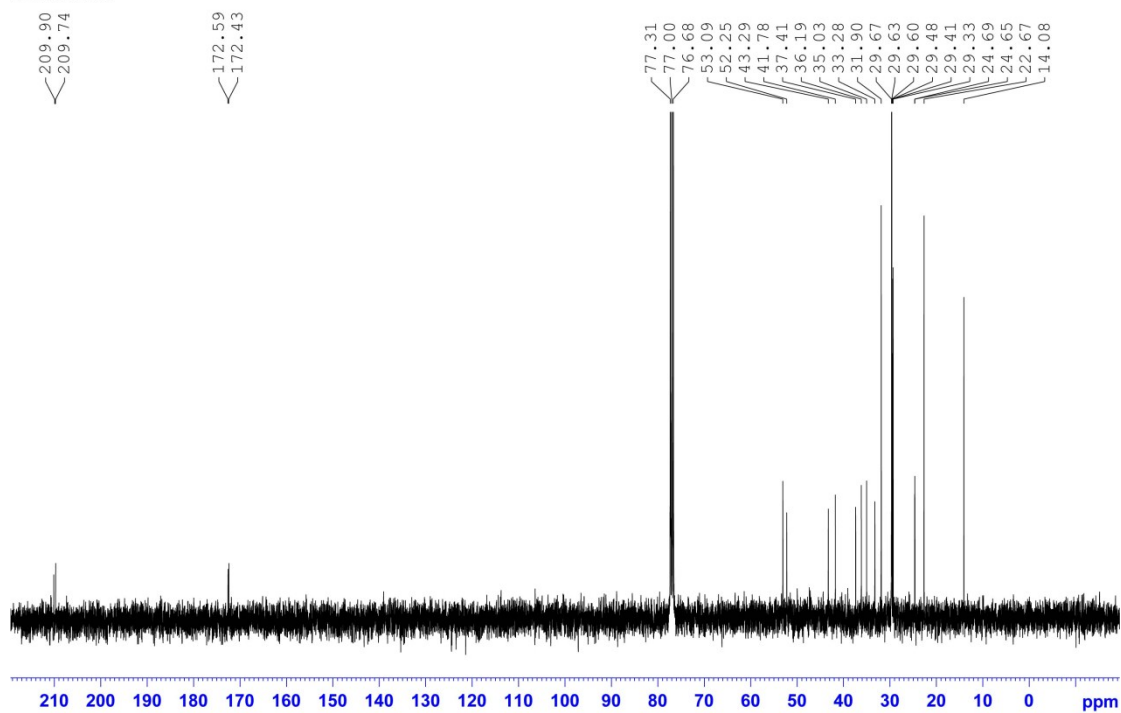

**(R)-1-(2-(hydroxymethyl)pyrrolidin-1-yl)hexadecan-1-one (1q)**

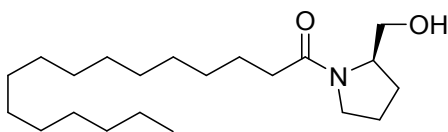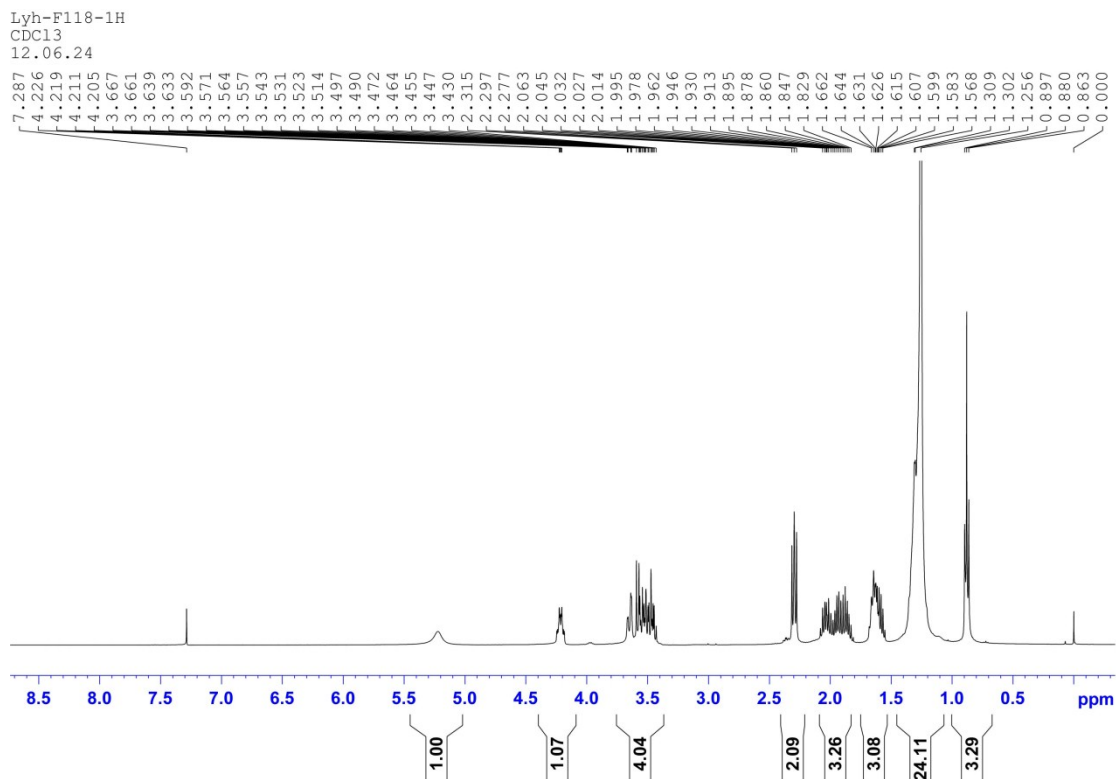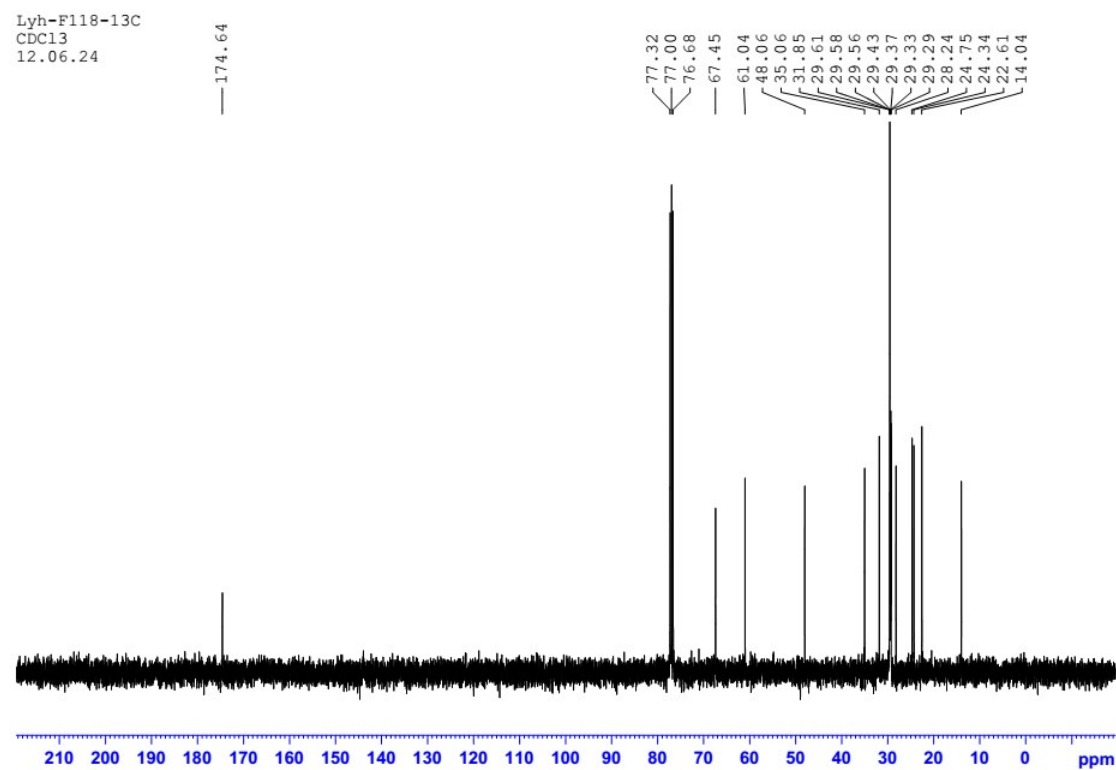

**(S)-1-(2-(hydroxymethyl)pyrrolidin-1-yl)hexadecan-1-one (1r)**

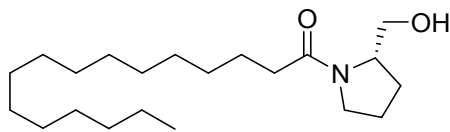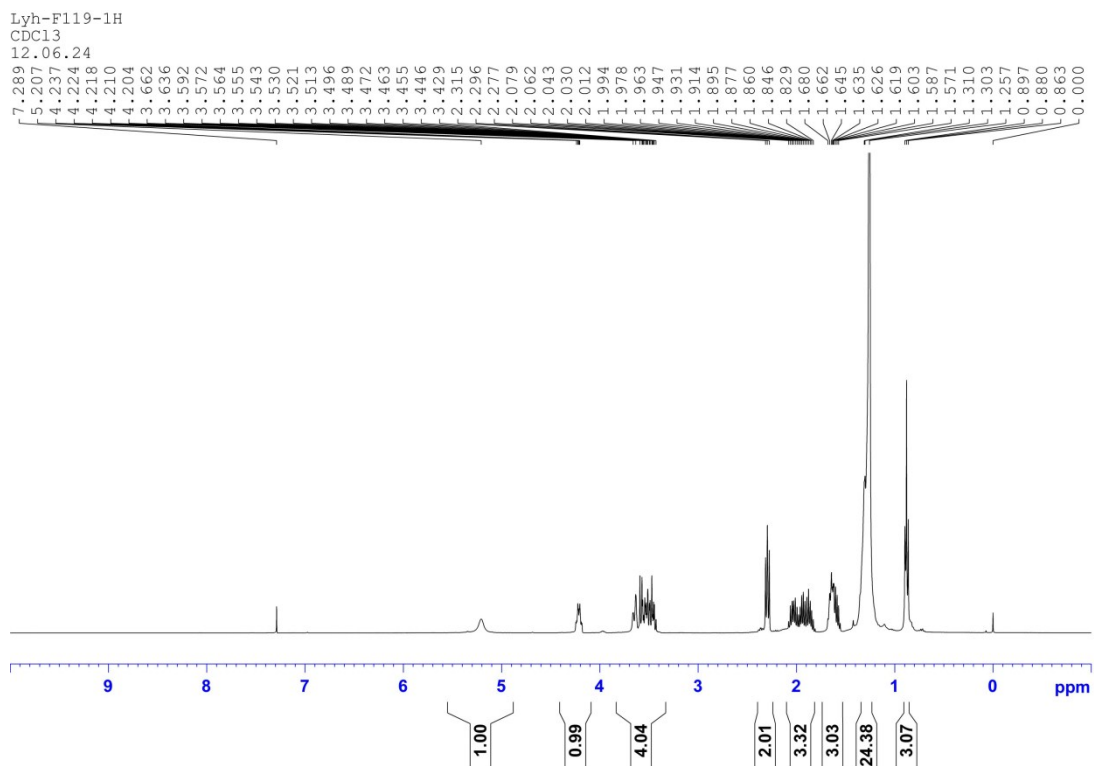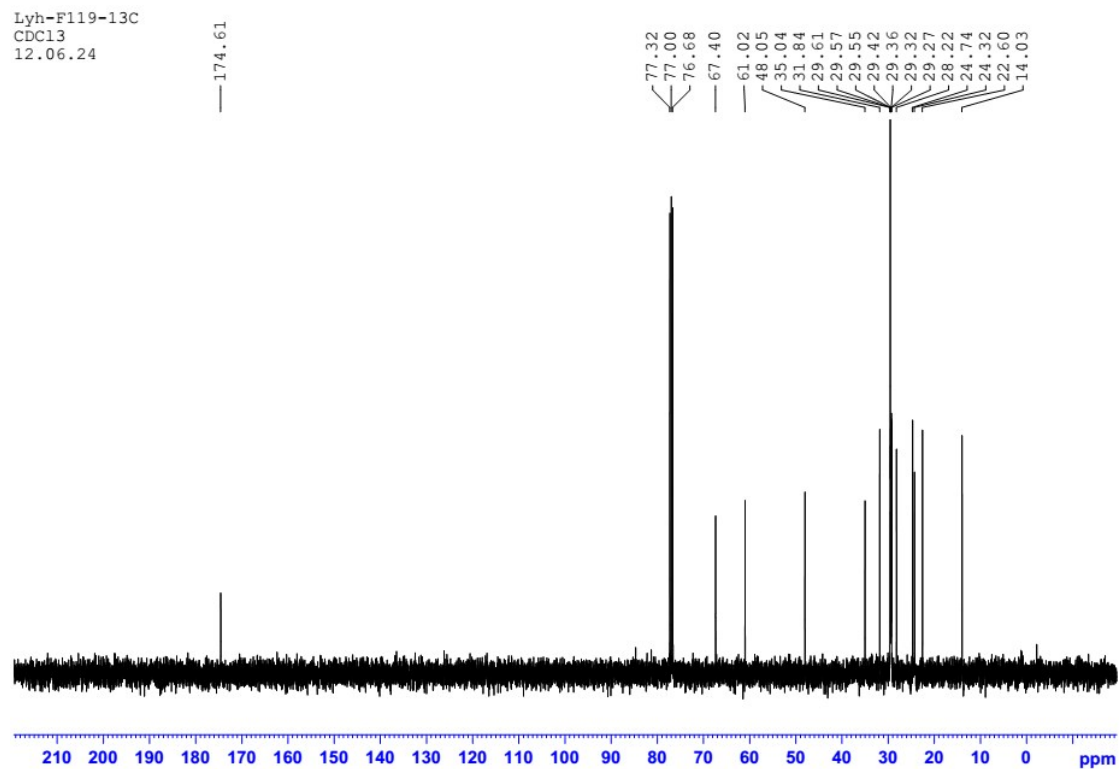



**(R)-1-(2-(methoxymethyl)pyrrolidin-1-yl)hexadecan-1-one (1s)**

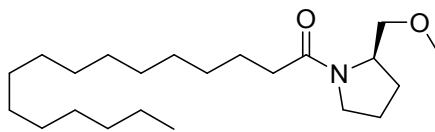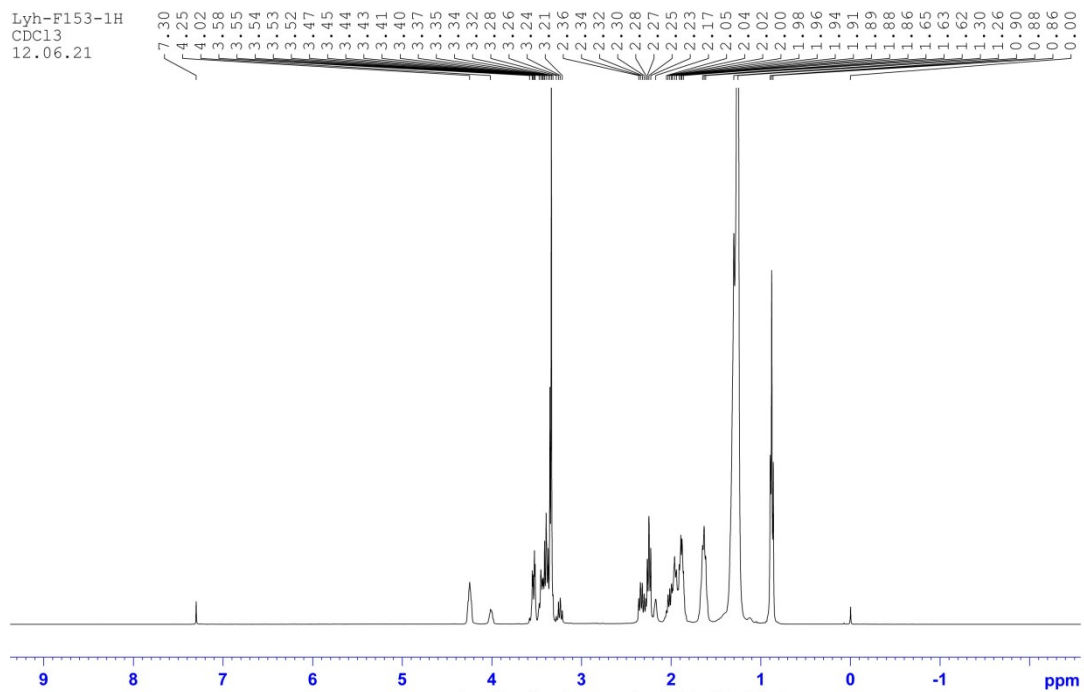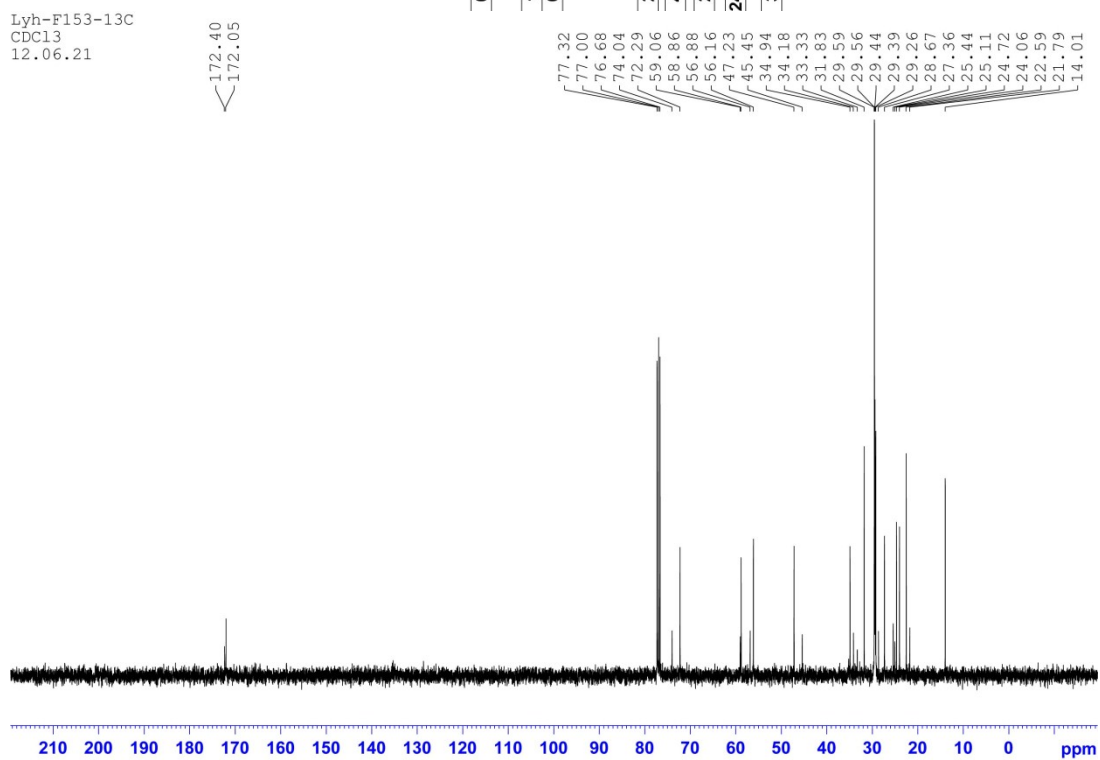

**(S)-1-(2-(methoxymethyl)pyrrolidin-1-yl)hexadecan-1-one (1t)**

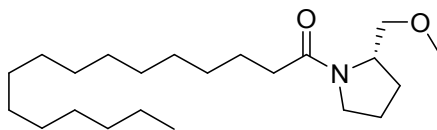

Lyh-F154-1H  
CDC13  
12.06.21

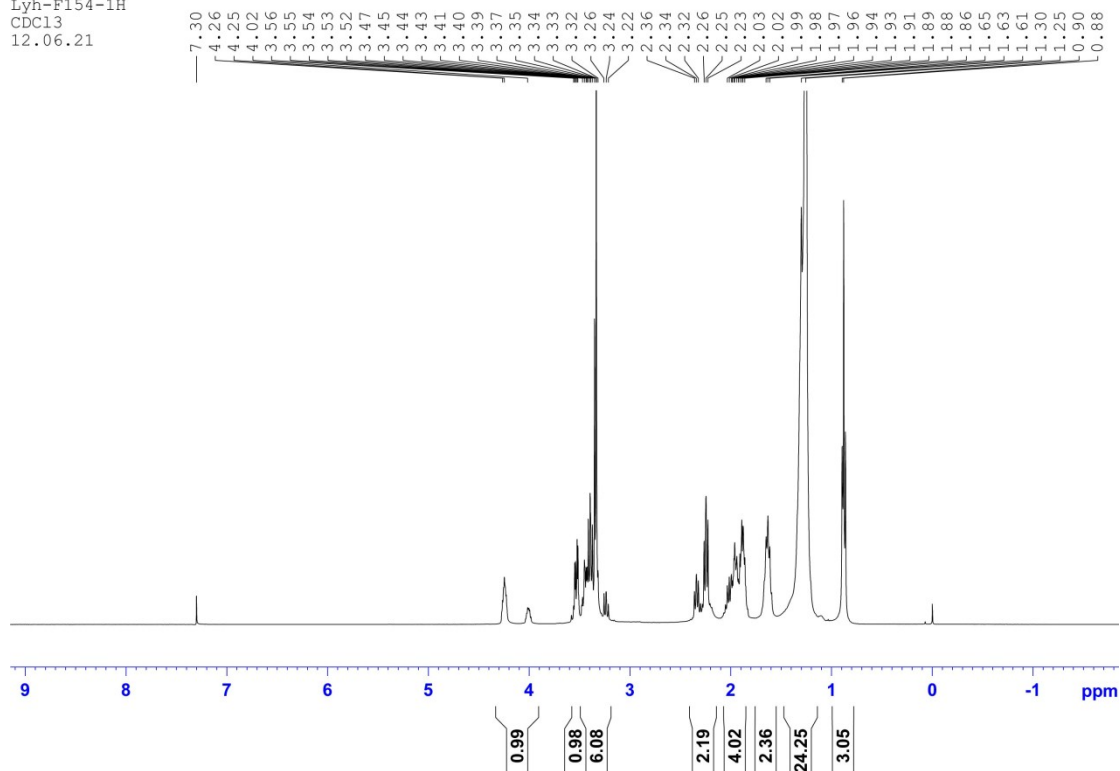

Lyh-F154-13C  
CDC13  
12.06.21

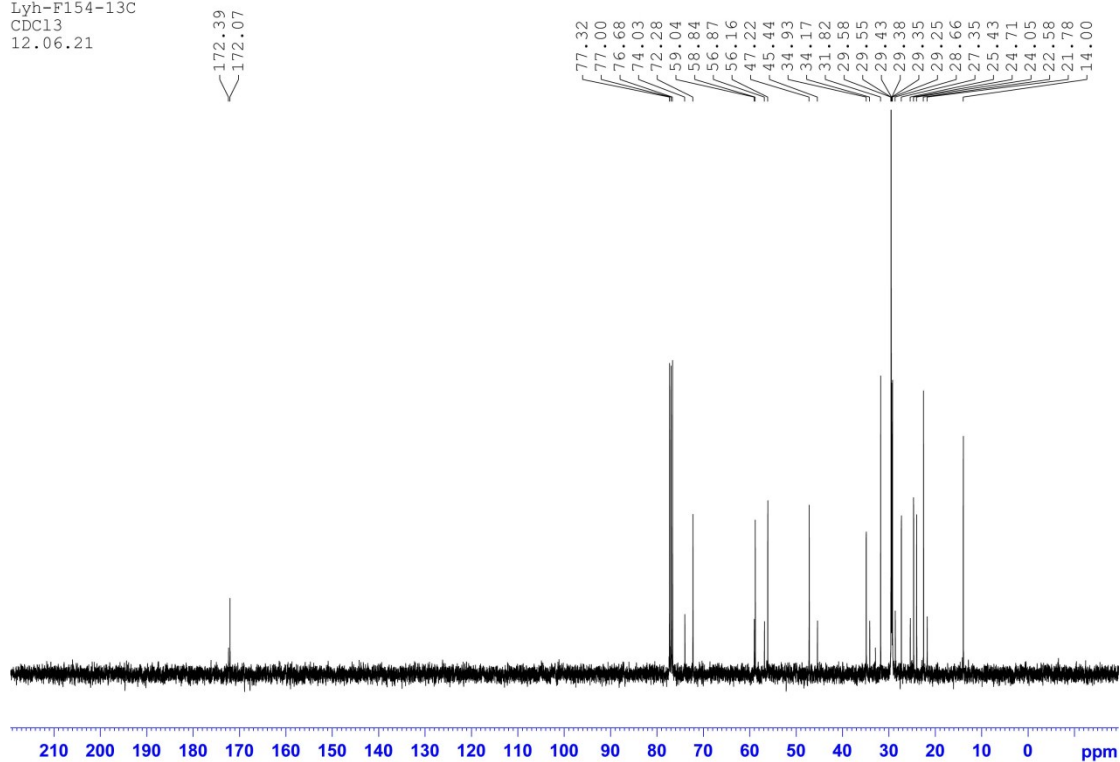

### 3-benzoyloxazolidin-2-one (2a)

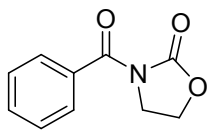

Lyh-F168-1H  
CDC13  
12.12.1

7.668  
7.648  
7.565  
7.546  
7.531  
7.449  
7.436  
7.418  
7.260

4.501  
4.482  
4.462  
4.186  
4.166  
4.147

— -0.000

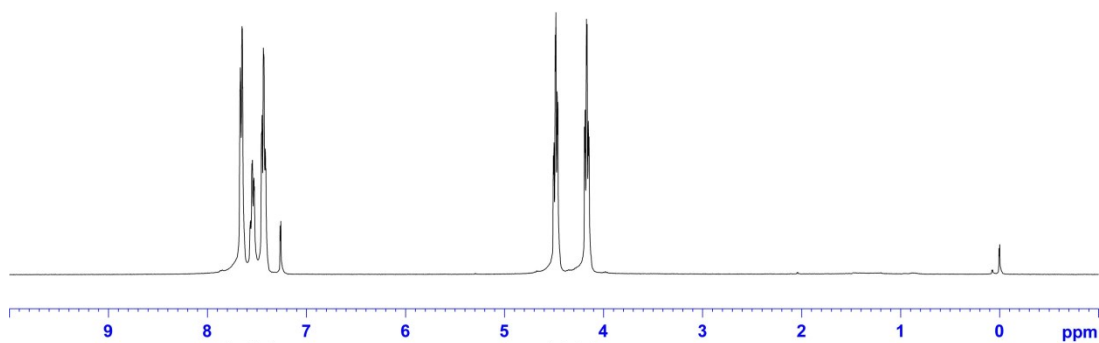

Lyh-F168-13C  
CDC13  
12.12.1

169.81  
153.20

132.64  
132.40  
129.09  
127.88

77.36  
77.04  
76.72

62.25

43.71

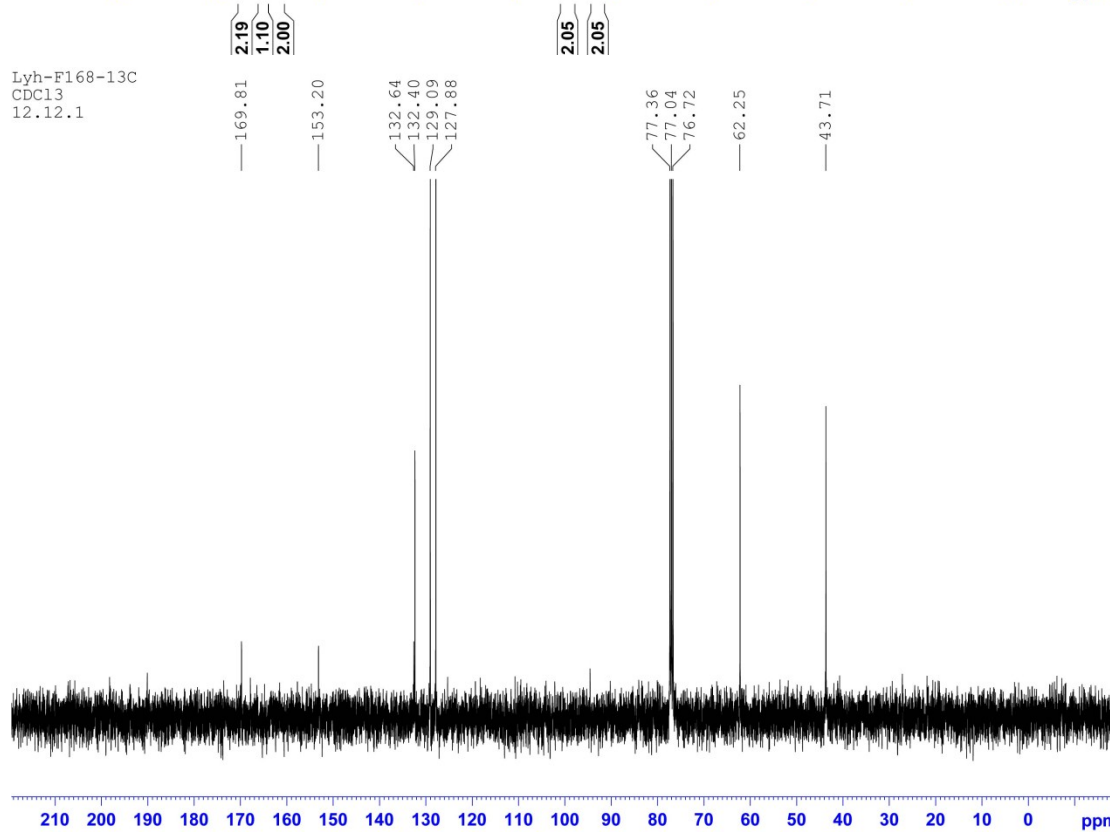

### 3-(2-phenylacetyl)oxazolidin-2-one (2b)

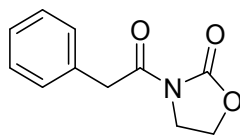

Lyh-F167-2-1H  
CDCl<sub>3</sub>  
13.1.11

7.330  
7.305  
7.297  
7.271  
7.265  
7.262  
7.250  
7.240

4.346  
4.326  
4.295  
4.260  
3.976  
3.956  
3.926

0.000

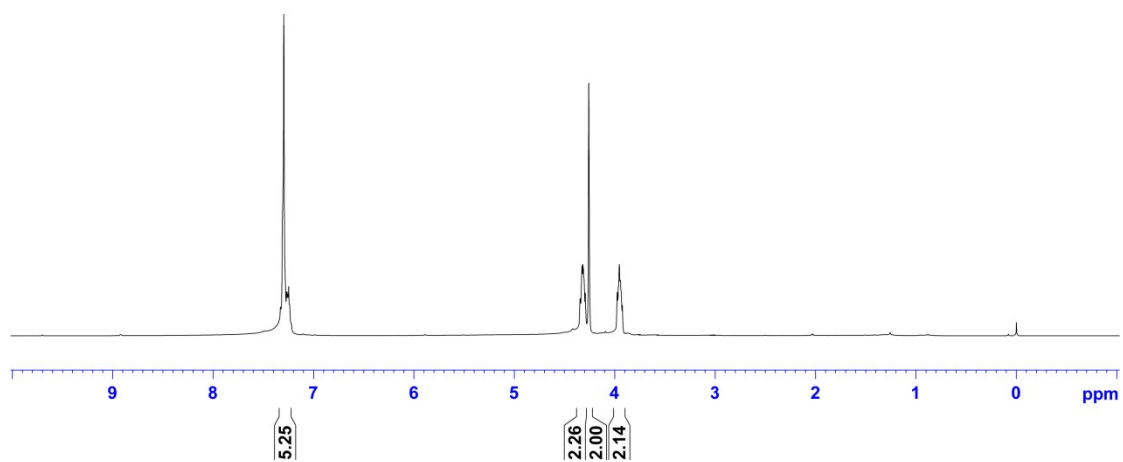

Lyh-F167-2-13C  
CDCl<sub>3</sub>  
13.1.11

171.09

153.39

133.45

129.58

128.37

127.02

77.31

77.00

76.68

61.86

42.51

40.91

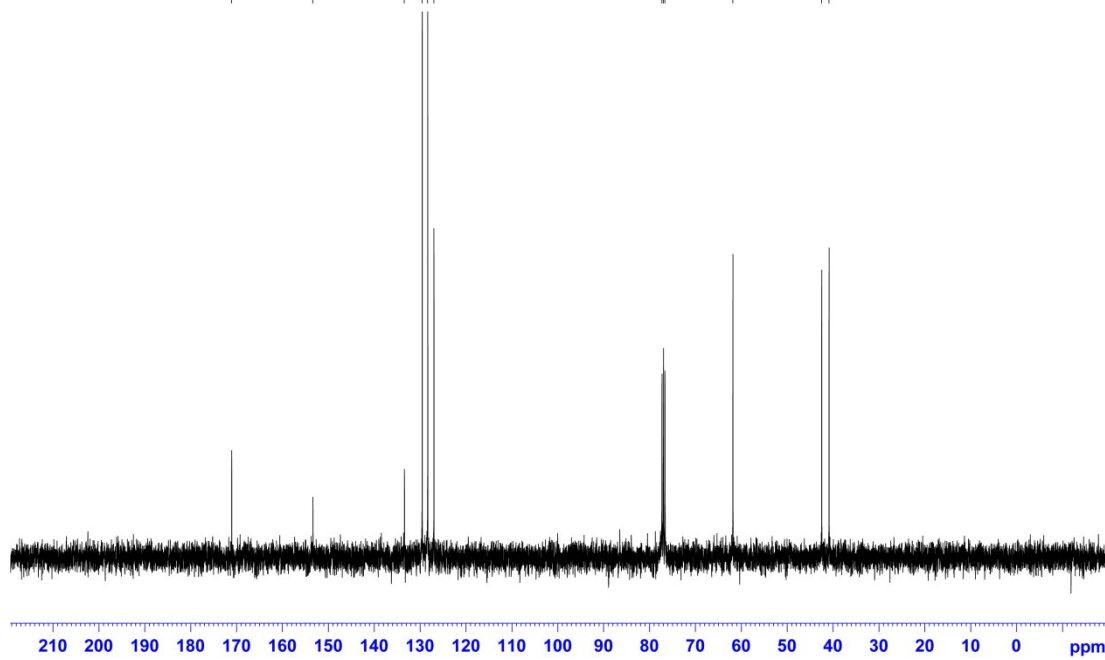

### 3-(3-phenylpropanoyl)oxazolidin-2-one (2c)

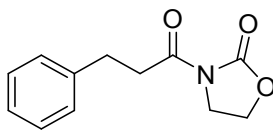

Lyh-F166-1-1H  
CDC13  
12.08.11

7.303  
7.300  
7.285  
7.272  
7.267  
7.255  
7.251  
7.234  
7.215  
7.212  
7.207  
7.194  
7.188  
7.181  
7.177

4.394  
4.375  
4.367  
4.354  
4.012  
3.991  
3.971  
3.272  
3.253  
3.243  
3.234  
3.005  
2.986  
2.967

— -0.000

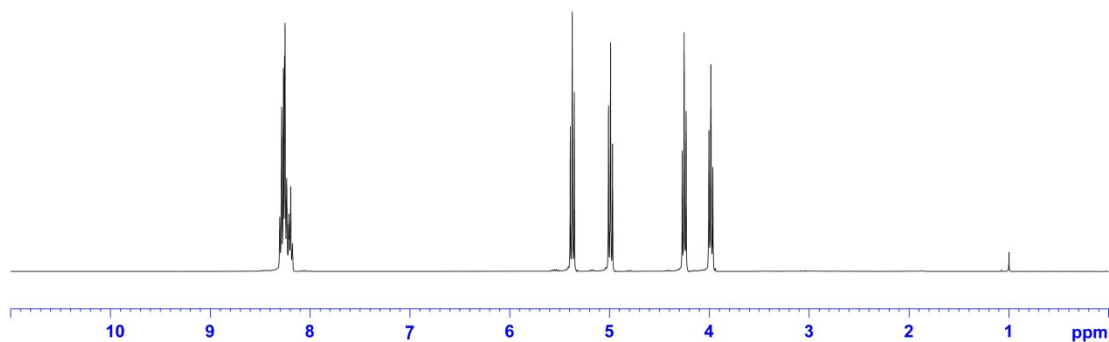

Lyh-F166-1-13C  
CDC13  
12.08.11

172.49  
153.47  
140.42  
128.48  
128.40  
126.18  
77.32  
77.00  
76.68  
62.02  
42.42  
36.73  
30.14

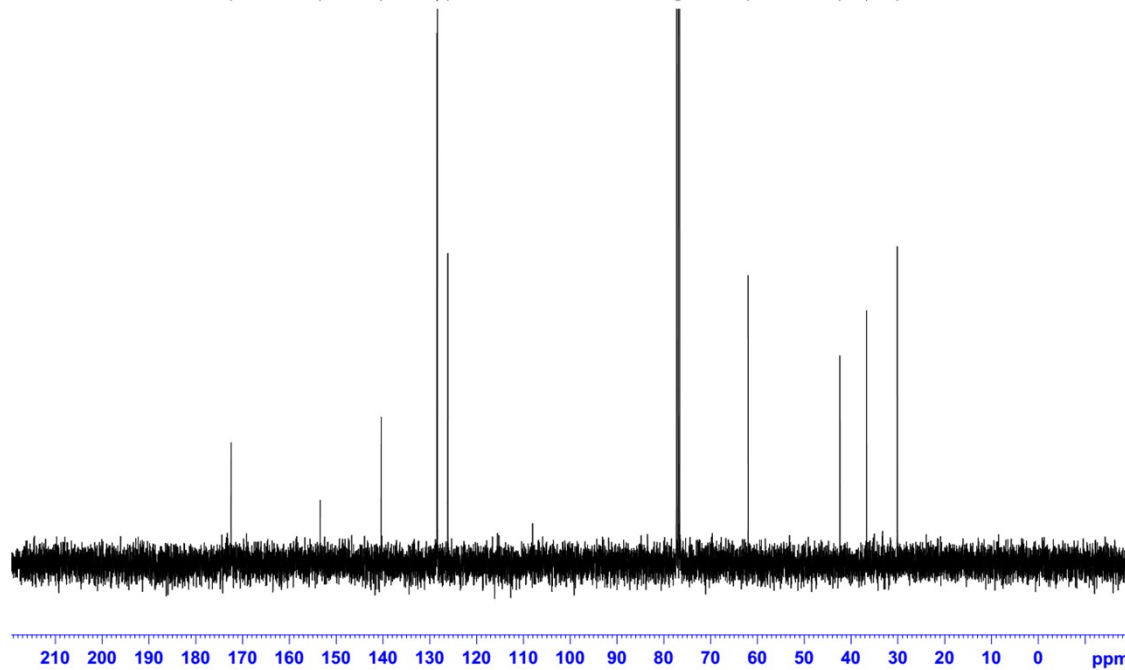

### 3-(4-phenylbutanoyl)oxazolidin-2-one (2d)

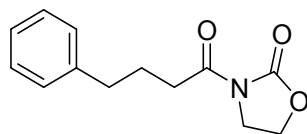

Lyh-F95-1H  
CDC13  
12.03.13

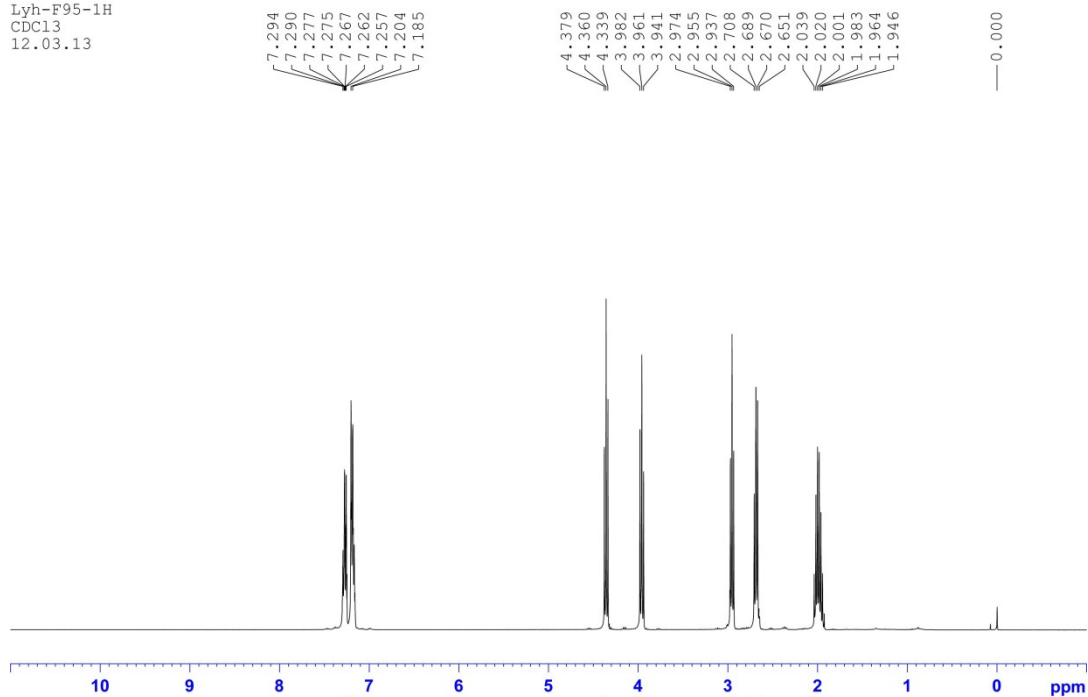

Lyh-F95-13C  
CDC13  
12.03.13

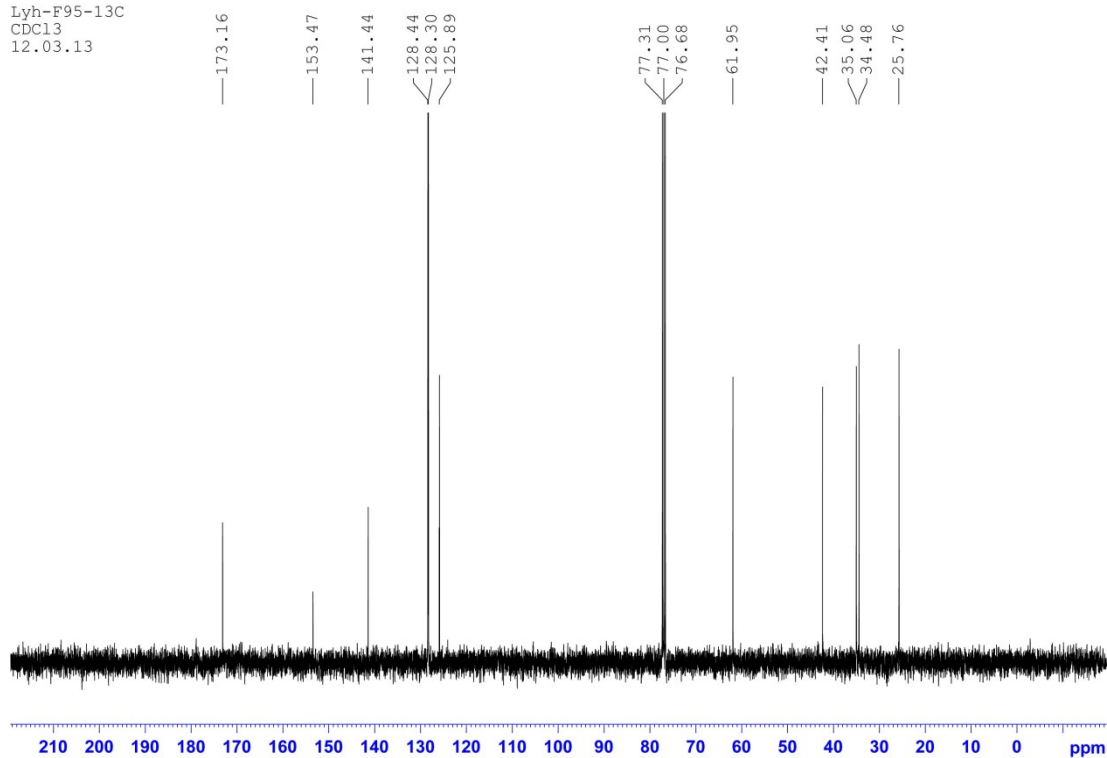

### 3-(5-phenylpentanoyl)oxazolidin-2-one (2e)

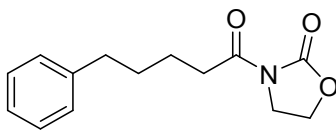

Lyh-F94-1H  
CDCl<sub>3</sub>  
12.03.11

7.285  
7.267  
7.265  
7.253  
7.248  
7.185  
7.167  
4.393  
4.373  
4.352  
4.003  
3.982  
3.963  
2.958  
2.941  
2.923  
2.662  
2.644  
2.627  
1.712  
1.703  
1.694  
1.688

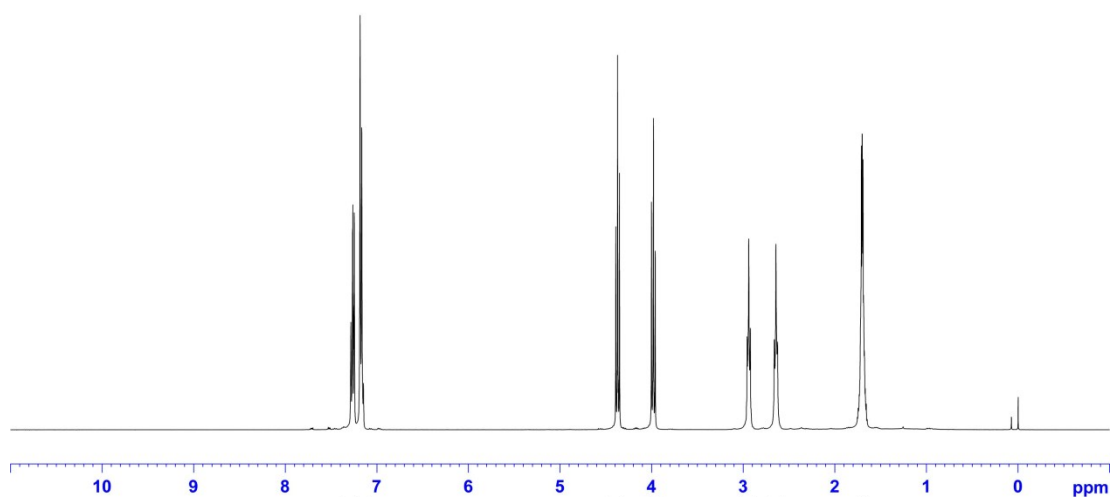

Lyh-F94-13C  
CDCl<sub>3</sub>  
12.03.11

173.25  
153.48  
142.08  
128.32  
128.21  
125.66  
77.31  
77.00  
76.68  
61.93  
42.42  
35.53  
34.83  
30.69  
23.80

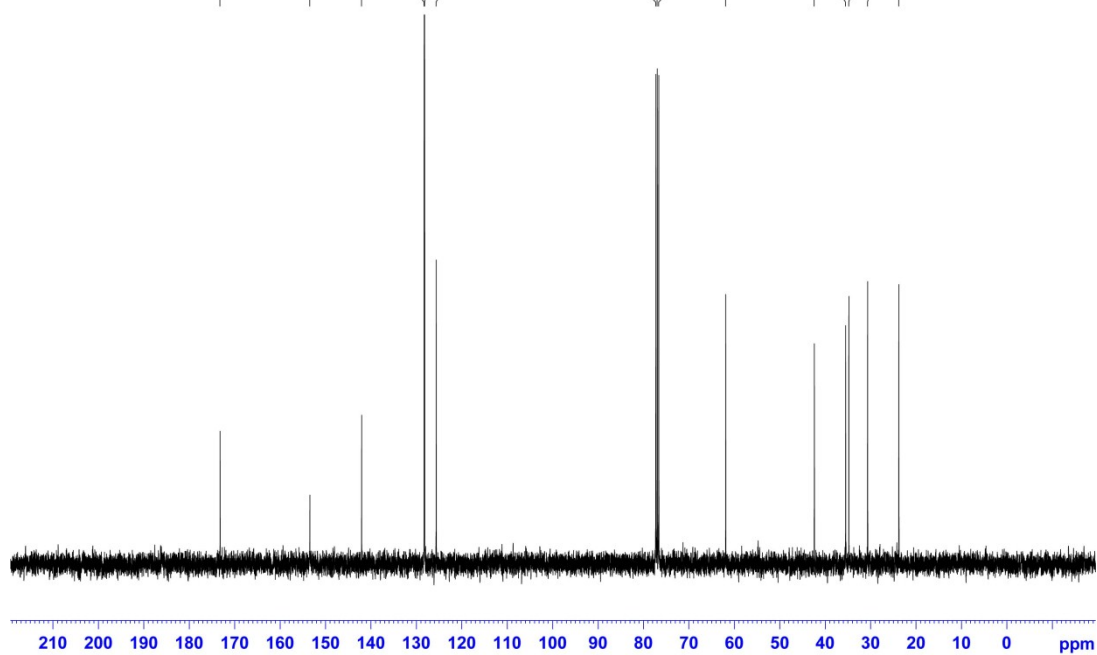

### 3-(6-phenylhexanoyl)oxazolidin-2-one (2f)

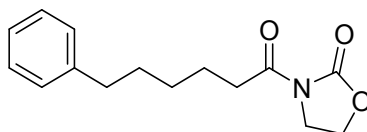

Lyh-F96-1H  
CDC13  
12.03.11

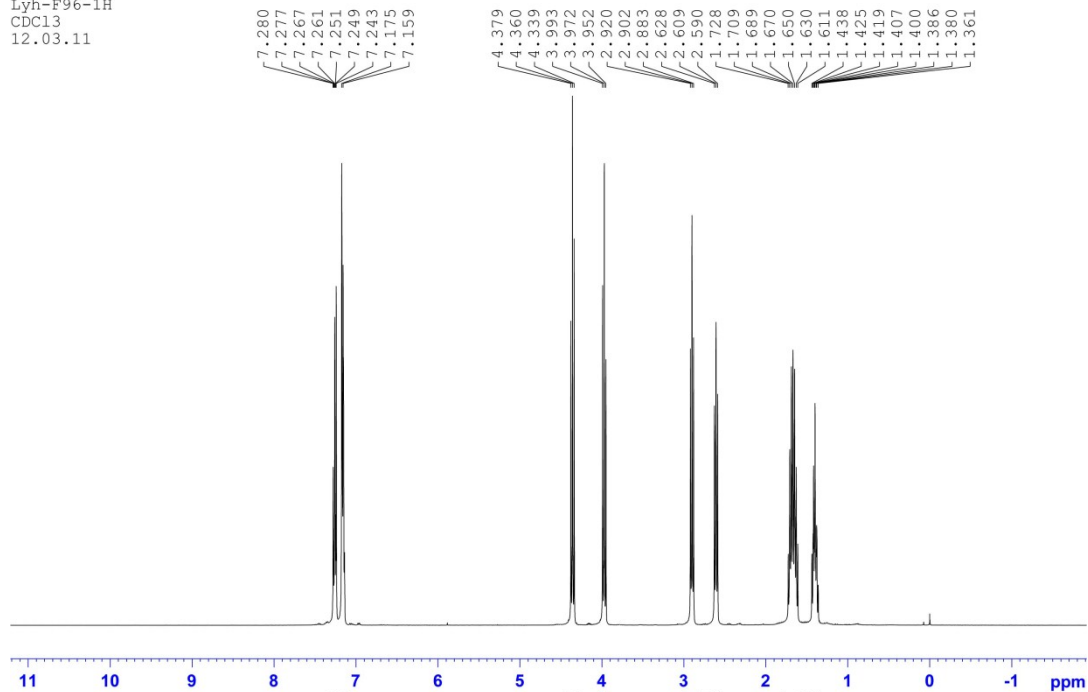

Lyh-F96-13C  
CDC13  
12.03.11

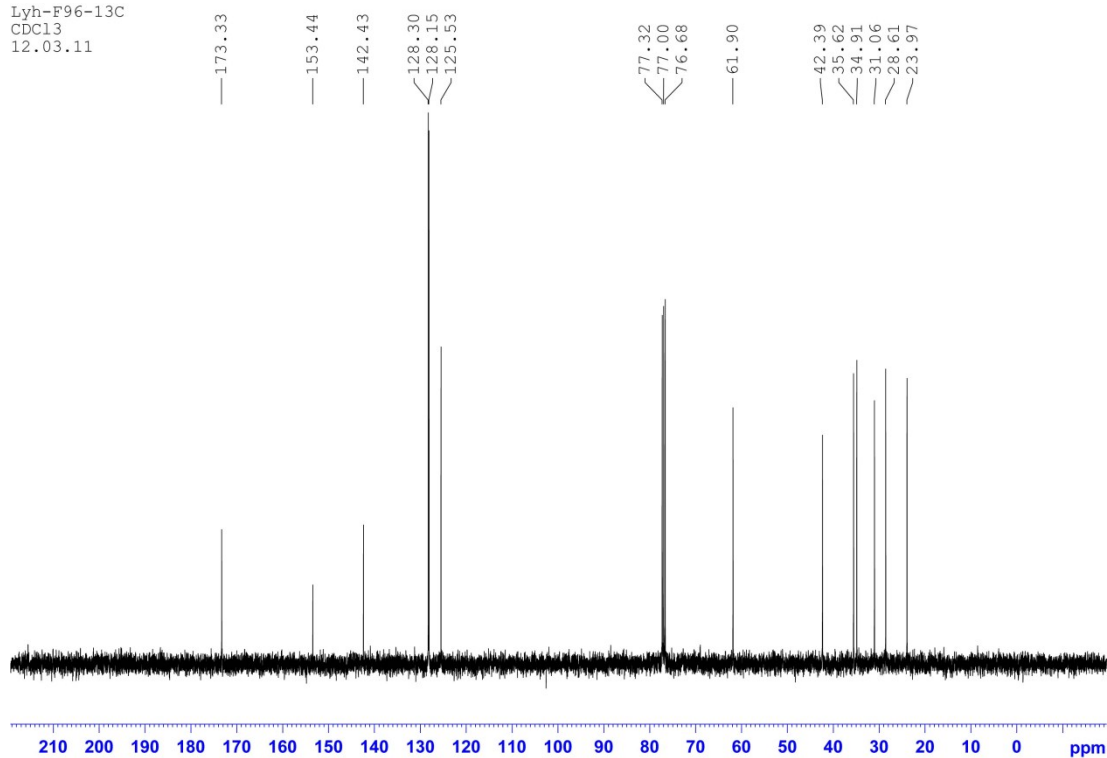



### 3-(7-phenylheptanoyl)oxazolidin-2-one (2g)

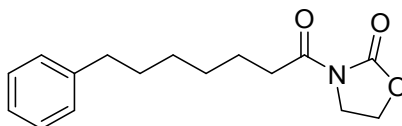

Lyh-F97-1H  
CDC13  
12.03.13

7.278  
7.259  
7.251  
7.241  
7.172  
7.156

4.383  
4.363  
4.342  
3.997  
3.976  
3.957  
2.916  
2.897  
2.878  
2.614  
2.595  
2.575  
1.691  
1.672  
1.655  
1.636  
1.618  
1.605  
1.601  
1.583  
1.424  
1.401  
1.390  
1.384  
1.375  
1.366  
1.359  
1.349

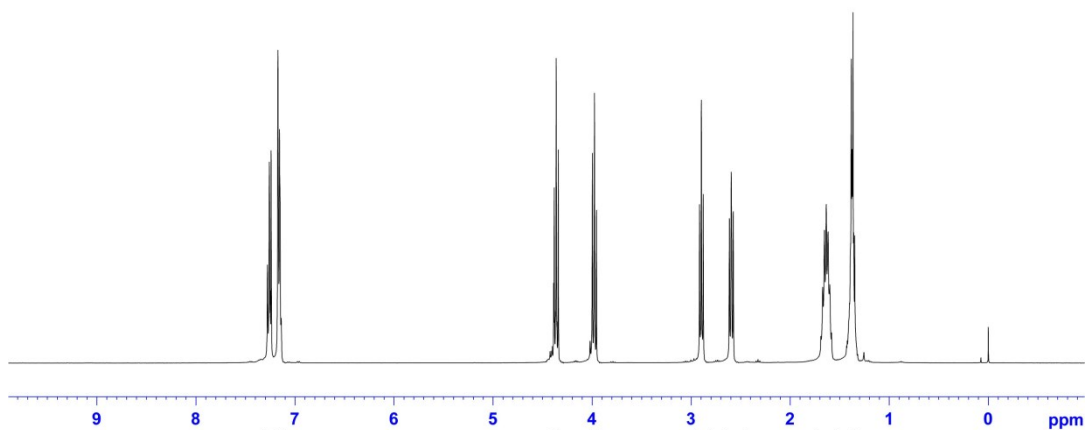

Lyh-F97-13C  
CDC13  
12.03.13

173.42  
153.47  
142.64  
128.30  
128.13  
125.49  
77.32  
77.00  
76.68  
61.91  
42.41  
35.77  
34.96  
31.19  
28.89  
28.86  
24.07

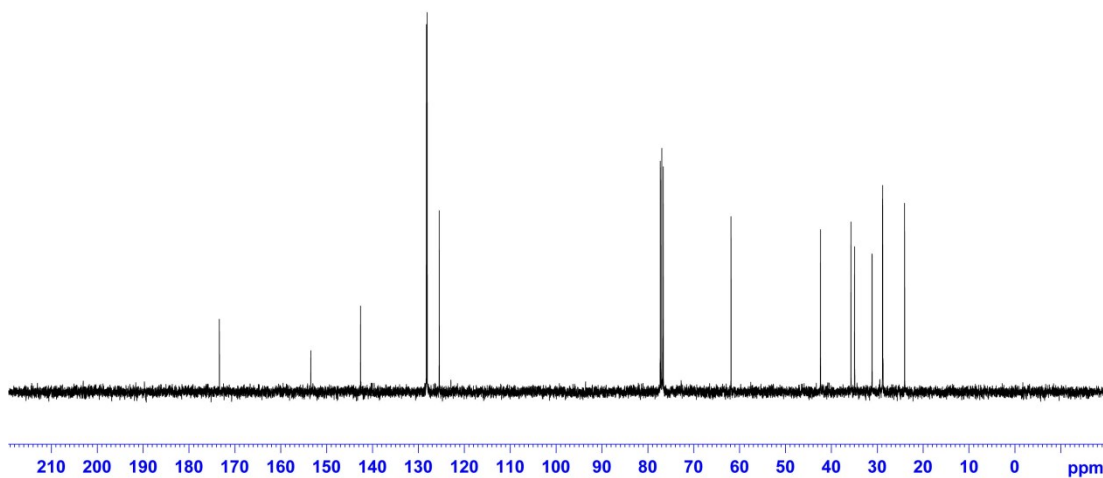

### 3-(8-phenyloctanoyl)oxazolidin-2-one (2h)

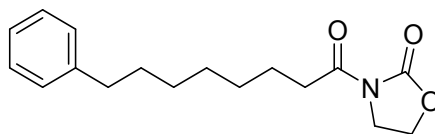

Lyh-F98-1H  
CDC13  
12.03.13

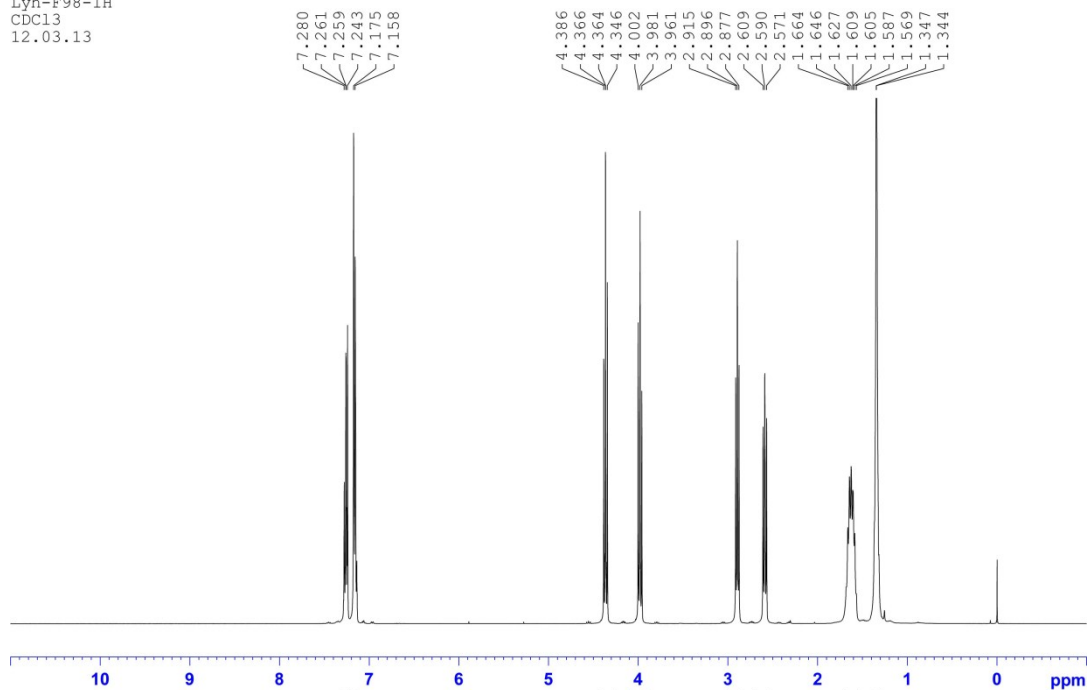

Lyh-F98-13C  
CDC13  
12.03.13

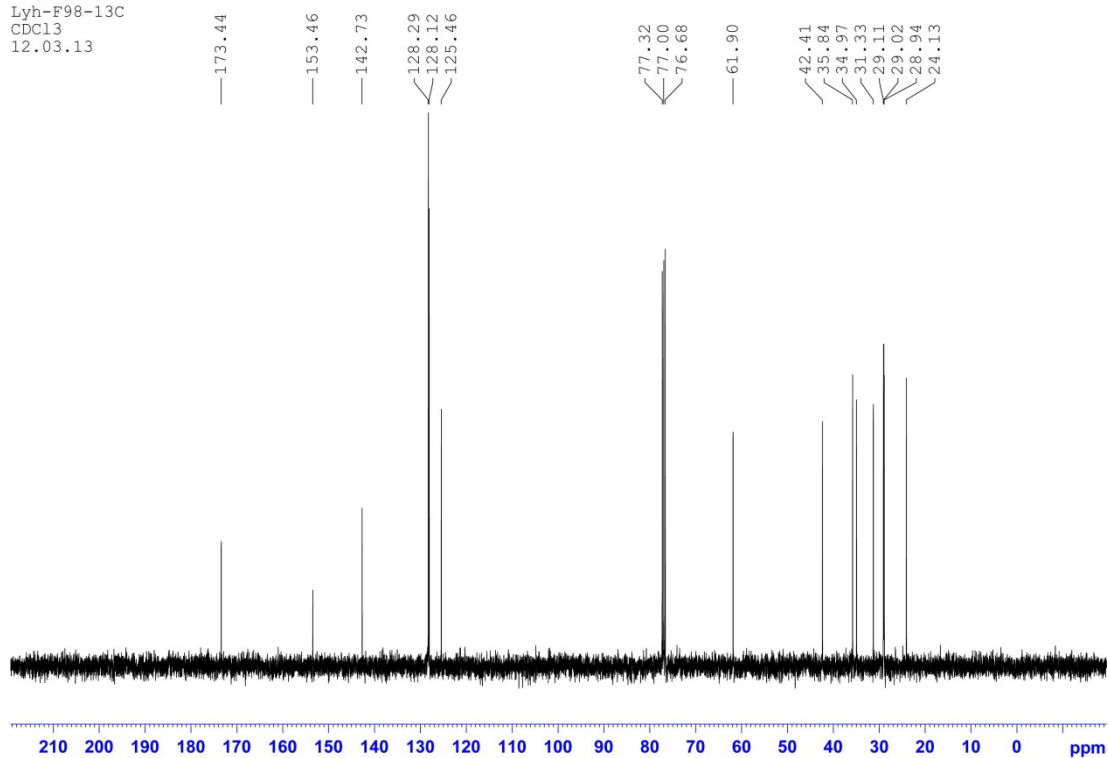

# Biphenyl-4-yl-carbonyl oxazolidin-2-one (3a)

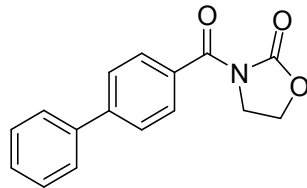

Lyh-F99-1H  
CDC13  
12.03.22

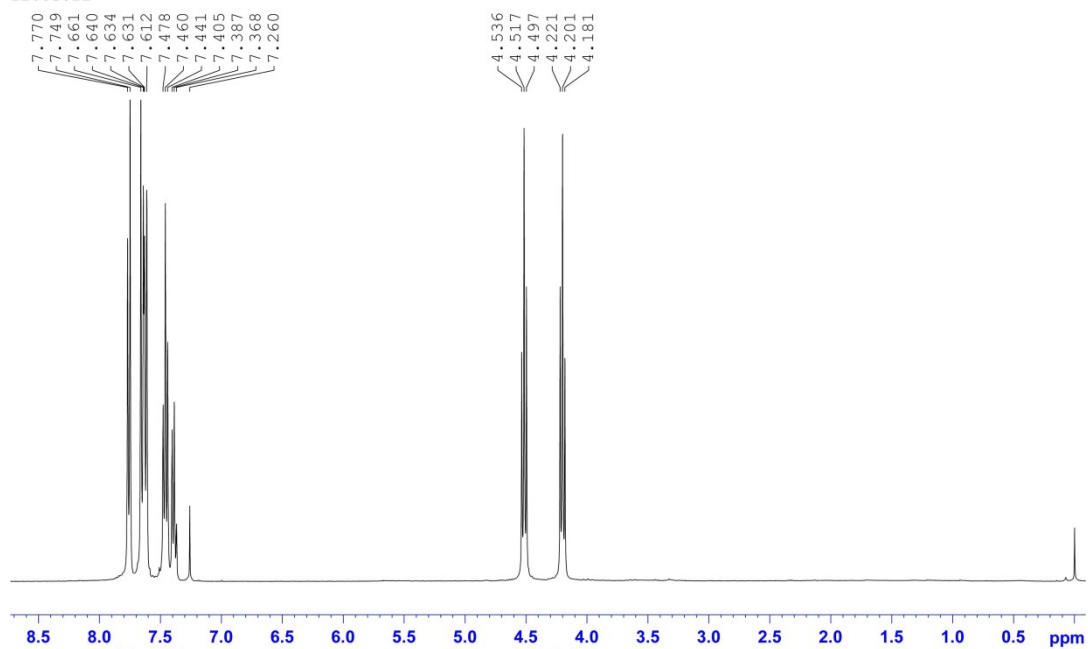

Lyh-F99-13C  
CDC13  
12.03.22

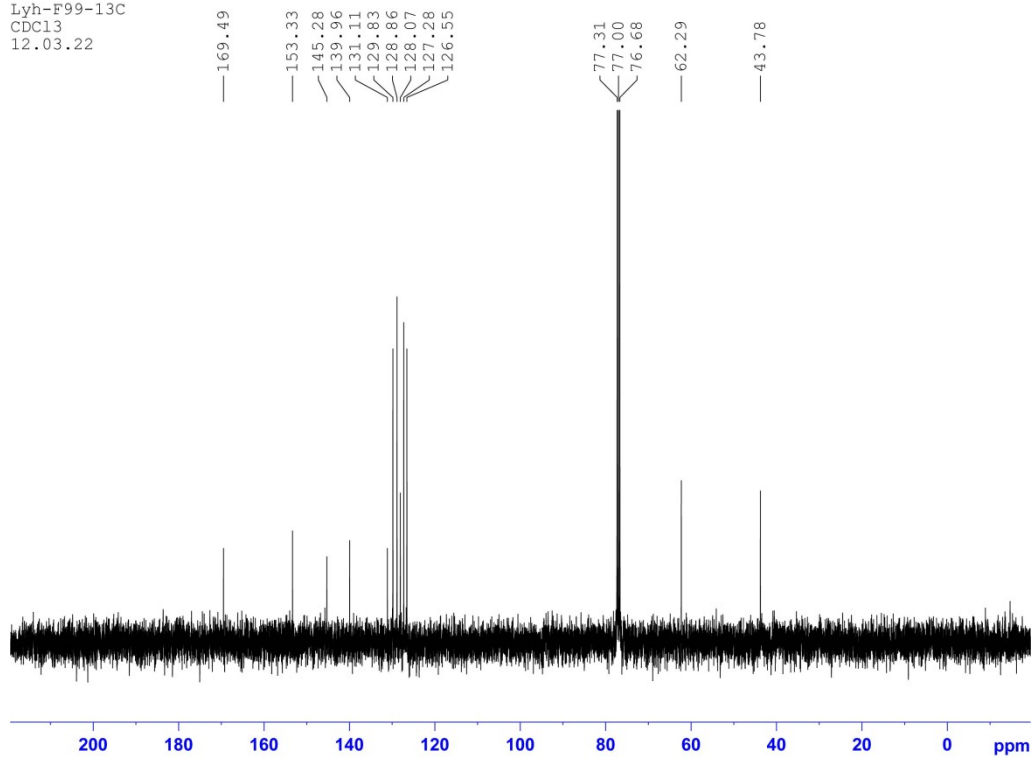

### 3-(4-phenoxybenzoyl)oxazolidin-2-one (3b)

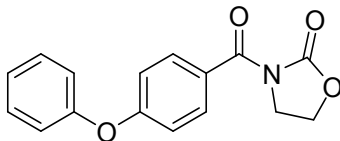

Lyh-F143-1H  
CDCl<sub>3</sub>  
12.05.01

7.690  
7.669  
7.410  
7.390  
7.370  
7.260  
7.210  
7.192  
7.173  
7.097  
7.078  
6.985  
6.963  
4.514  
4.495  
4.475  
4.189  
4.169  
4.150

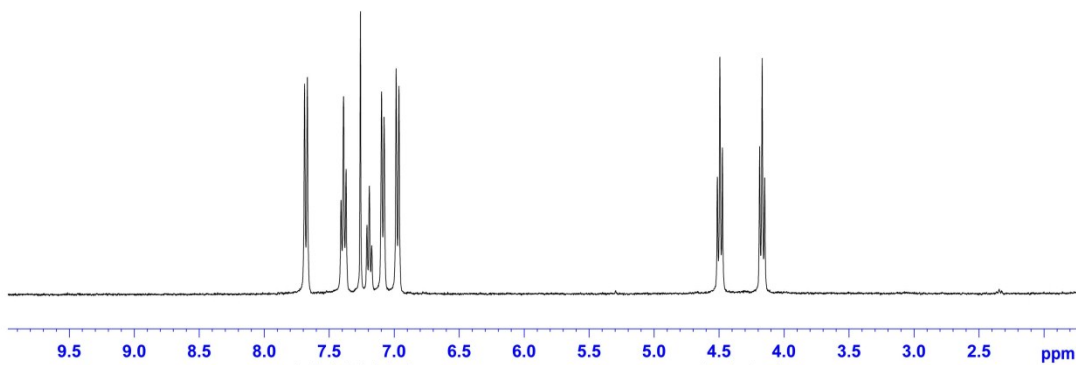

Lyh-F143-2-13C  
CDCl<sub>3</sub>  
12.04.21

168.938  
161.657  
155.454  
153.421  
131.731  
130.004  
126.388  
124.568  
120.293  
116.705  
77.315  
76.998  
76.680  
62.245  
43.894  
-0.027

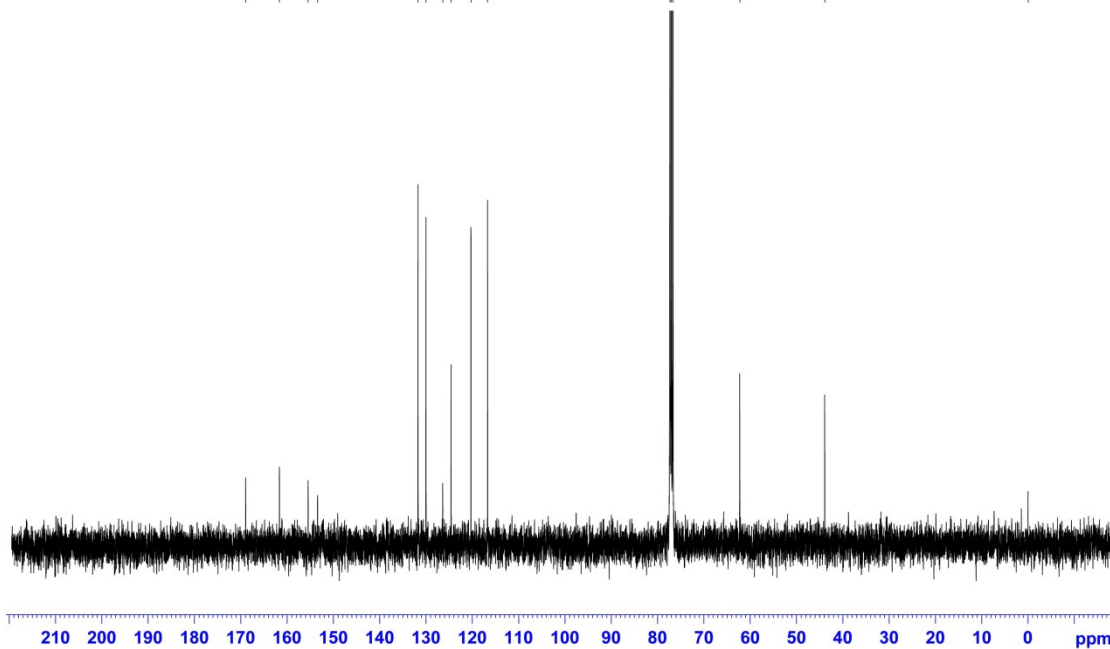

### 3-(4-(benzyloxy)benzoyl)oxazolidin-2-one (3c)

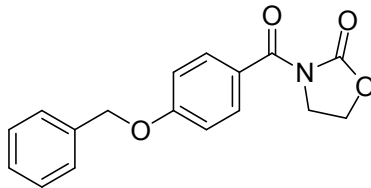

Lyh-F145-1H  
CDC13  
12.05.11

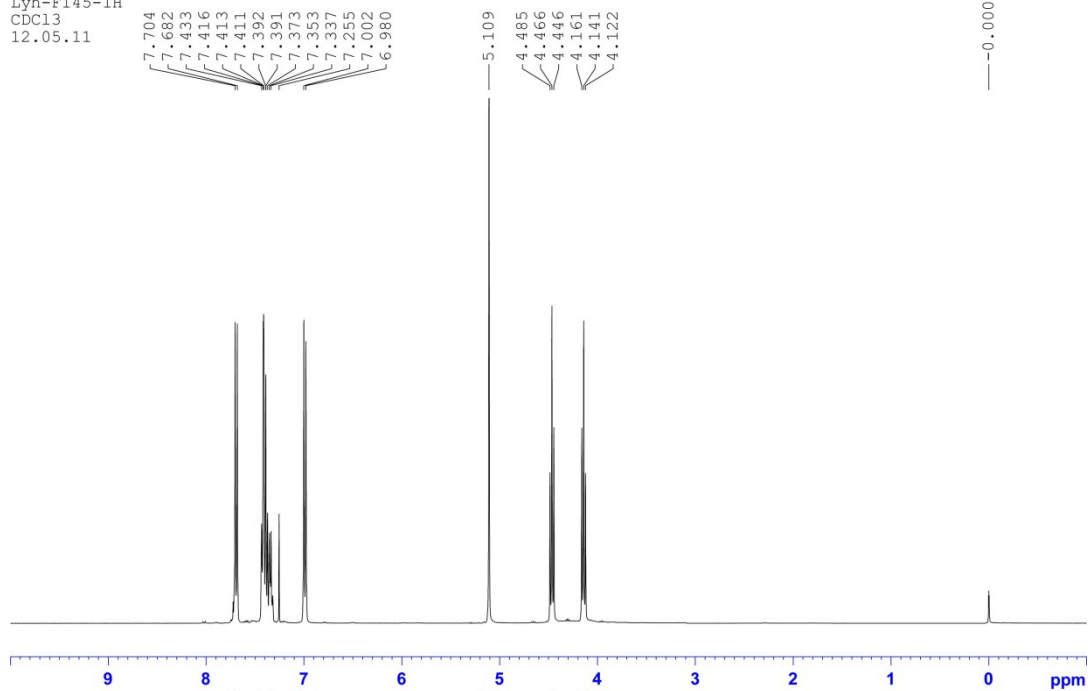

Lyh-F145-13C  
CDC13  
12.05.11

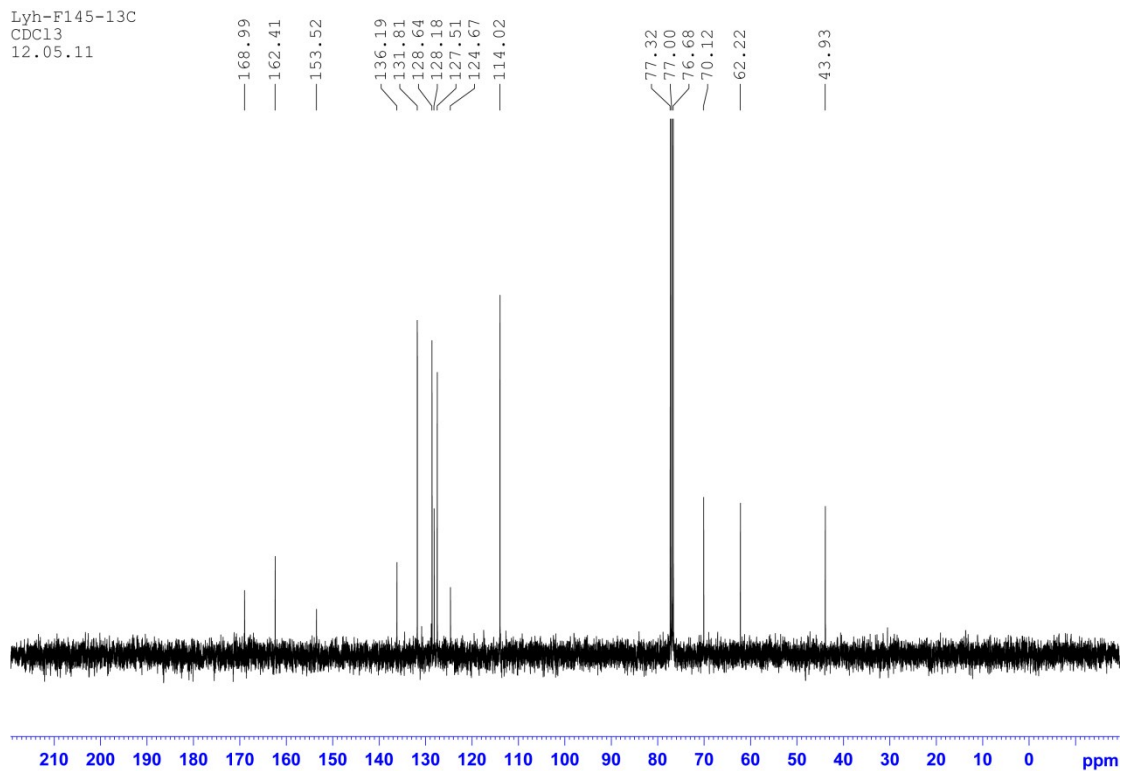

# 4-phenethoxybenzoic acid (3d-1)

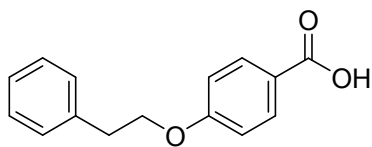

Lyh-F152-H  
CDC13  
12.06.13

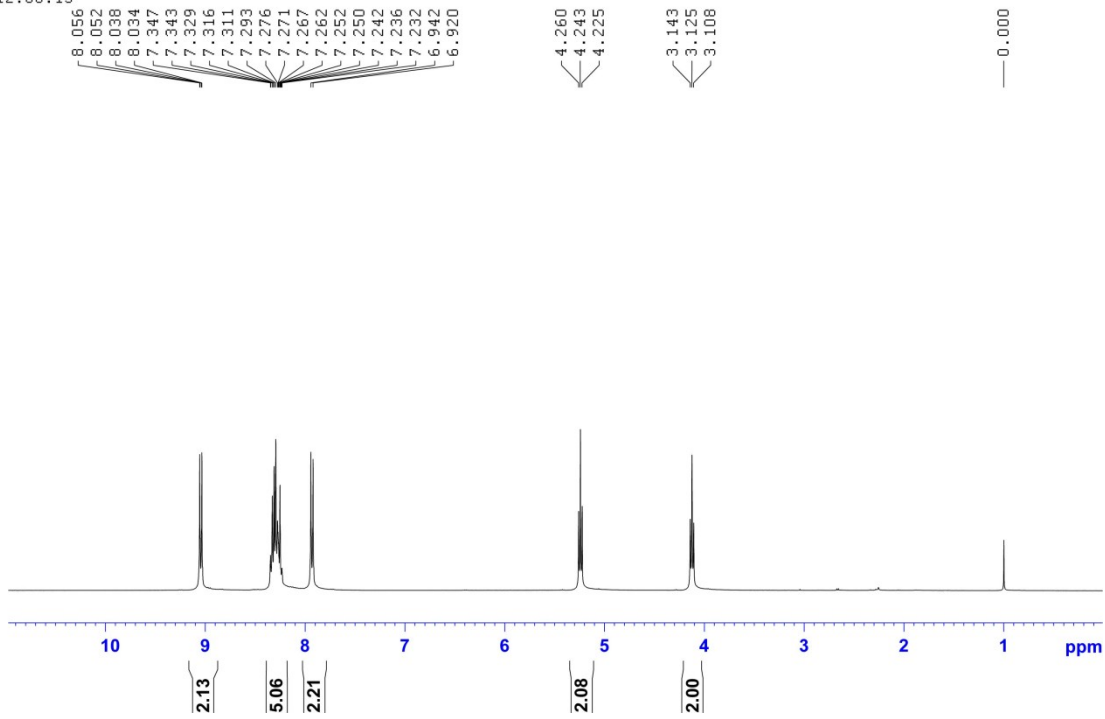

Lyh-F152-C13  
CDC13  
12.06.13

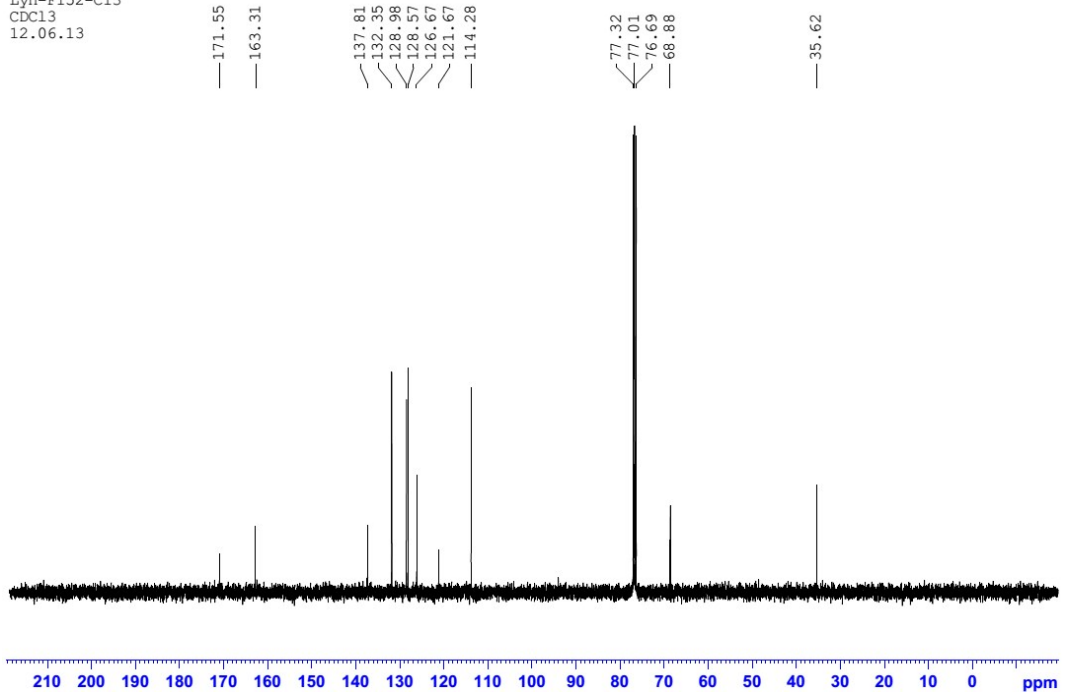

### 3-(4-phenethoxybenzoyl)oxazolidin-2-one (3d)

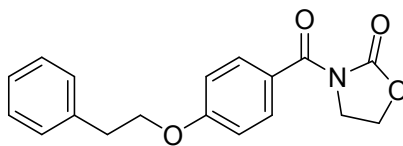

Lyh-F148-1H  
CDC13  
12.06.18

7.684  
7.663  
7.340  
7.322  
7.303  
7.286  
7.267  
7.254  
7.243  
7.226  
6.913  
6.892

4.480  
4.461  
4.441  
4.421  
4.223  
4.206  
4.155  
4.136  
4.116  
3.128  
3.111  
3.093

—0.000

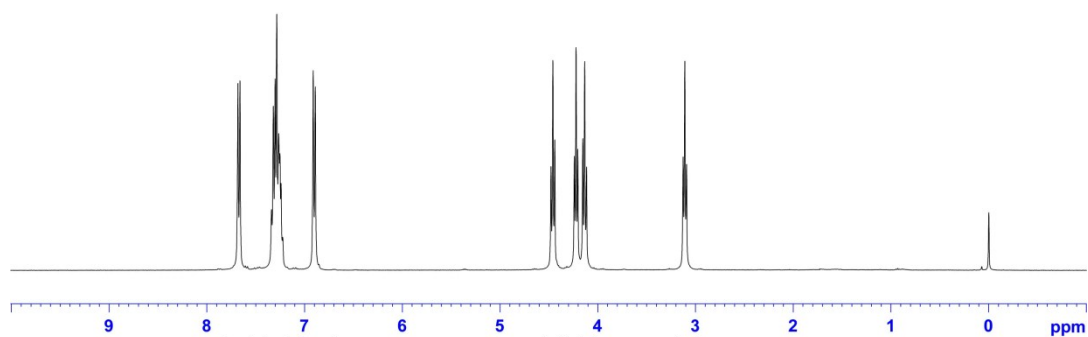

Lyh-F148-13C  
CDC13  
12.06.18

169.02  
162.49  
153.52

137.82  
131.81  
128.95  
128.51  
126.59  
124.42  
113.69

77.32  
77.00  
76.68  
68.76  
62.20

43.94  
35.58

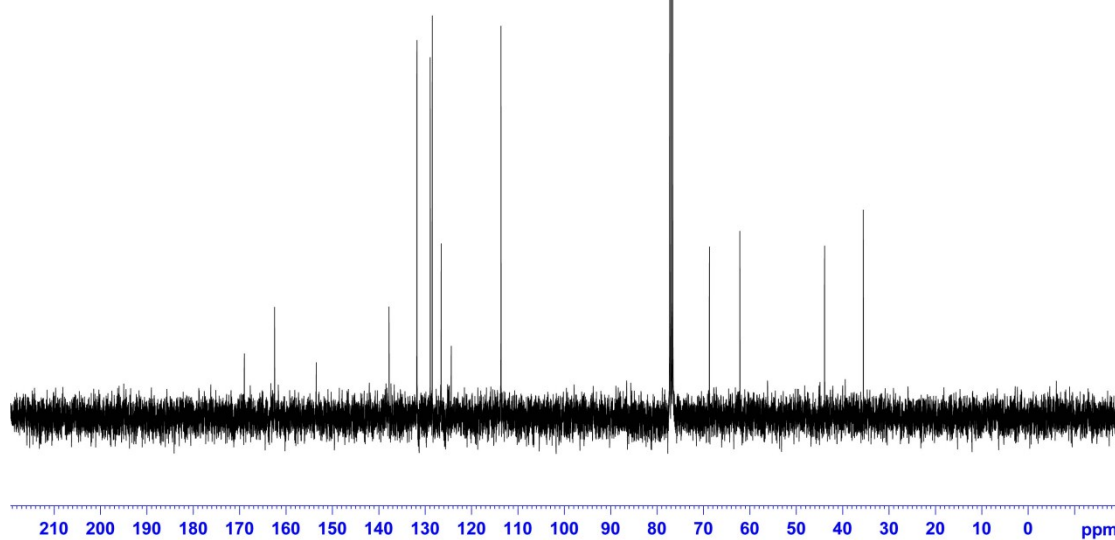

# 6-cyclohexylhexanoic acid (3j-1)

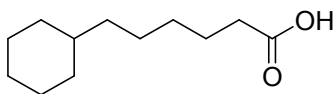

Lyh-F195-1H  
CDCl3  
12.12.1

7.284

2.383  
2.364  
2.345  
1.717  
1.686  
1.673  
1.654  
1.636  
1.340  
1.331  
1.280  
1.247  
1.239  
1.222  
1.216  
1.205  
1.190  
1.173  
1.156  
0.915  
0.887  
0.863  
0.836  
0.023

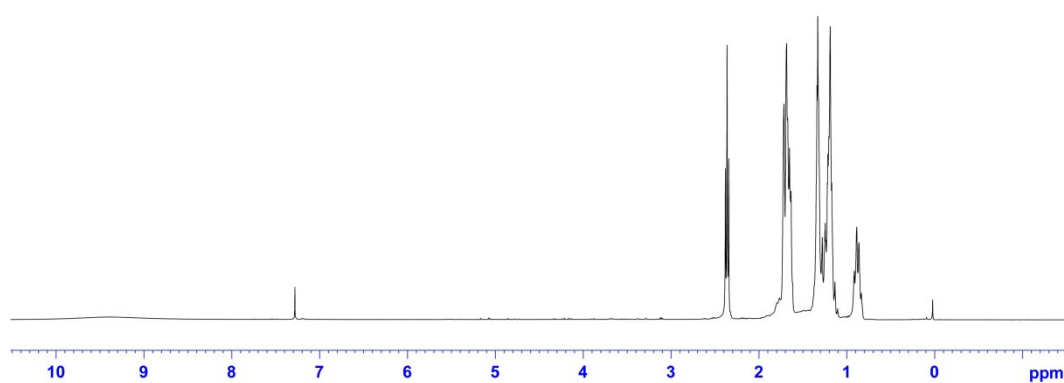

Lyh-F195-13C  
CDCl3  
12.12.1

180.12

77.31  
77.00  
76.68  
37.60  
37.24  
34.09  
33.41  
29.37  
26.74  
26.44  
26.42  
24.70

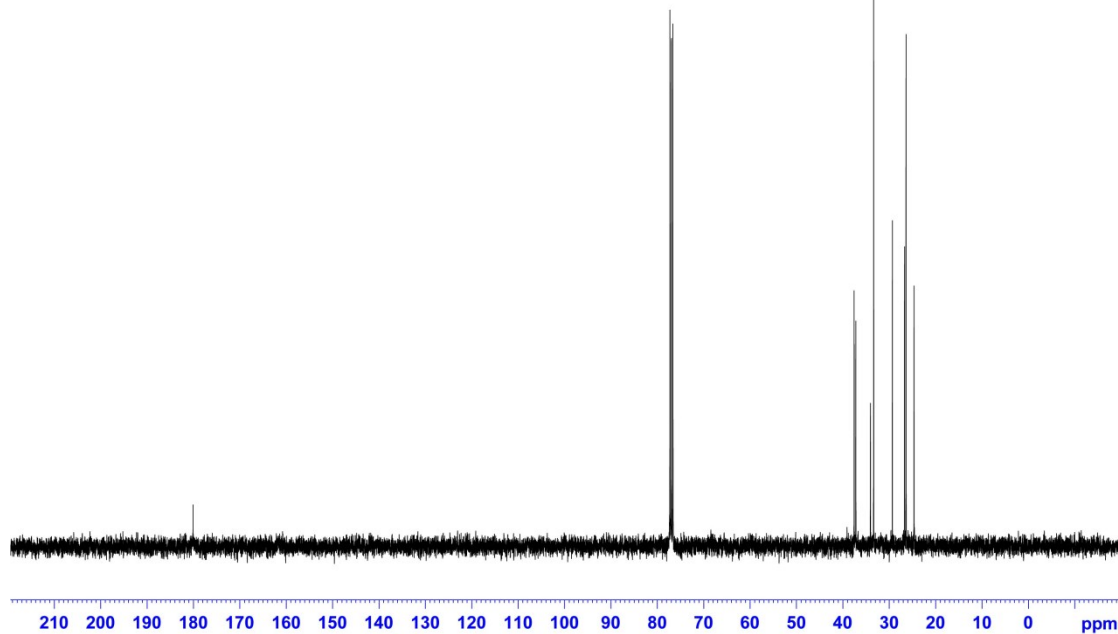



### 3-(6-cyclohexylhexanoyl)oxazolidin-2-one (3j)

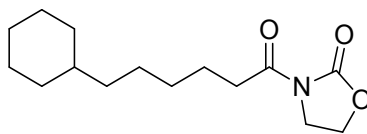

Lyh-F208-1H  
 CDC13  
 12.12.8

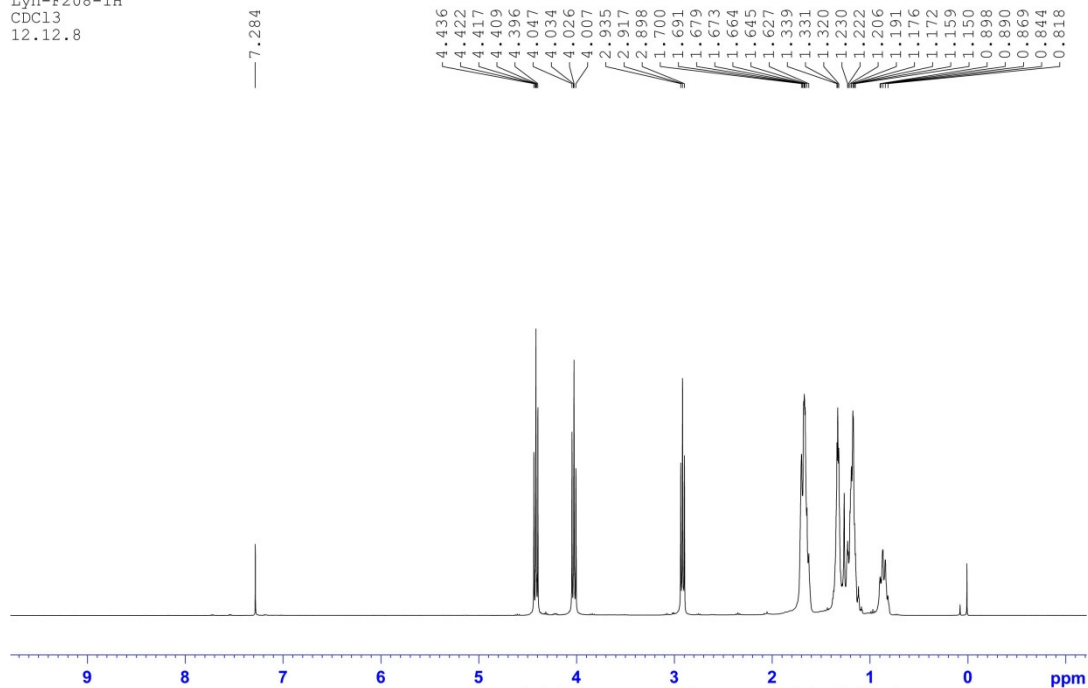

Lyh-F208-13C  
 CDC13  
 12.12.8

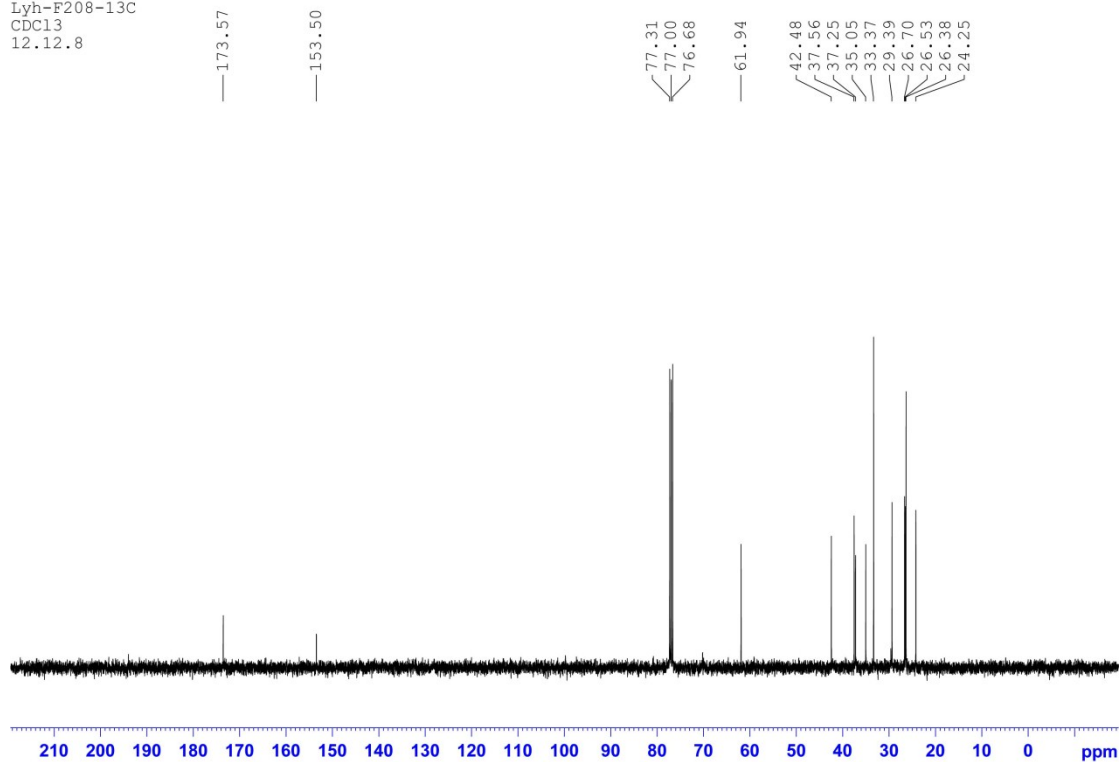

### 4-benzylidenecyclohexanecarboxylic acid (3h-1)

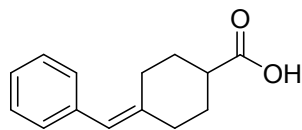

Lyh-F218-1-1H  
 CDCl<sub>3</sub>  
 13.1.11

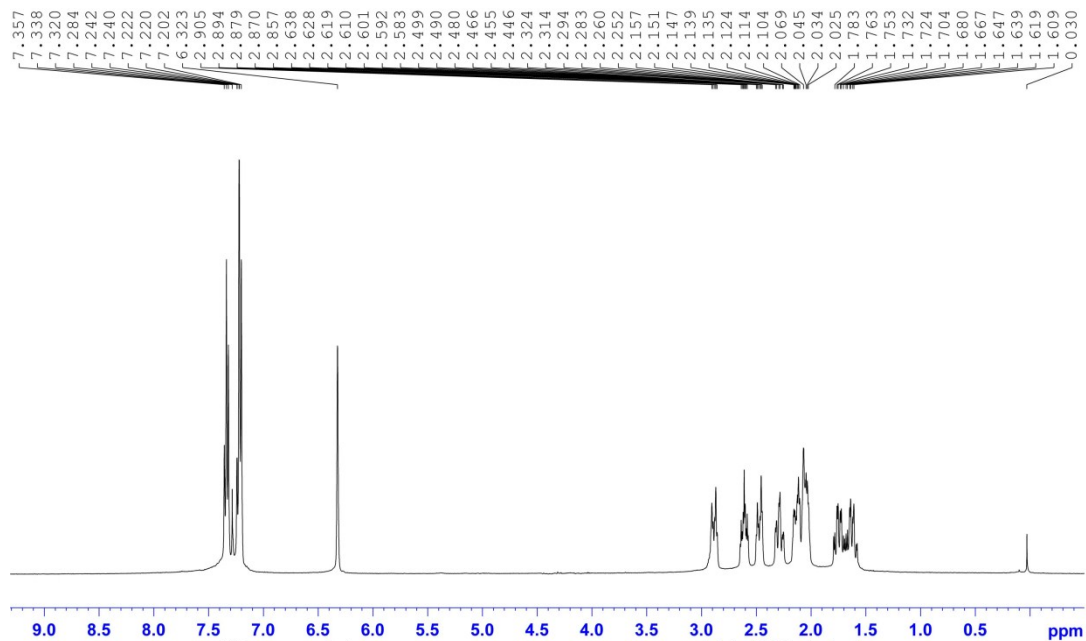

Lyh-F218-1-13C  
 CDCl<sub>3</sub>  
 13.1.11

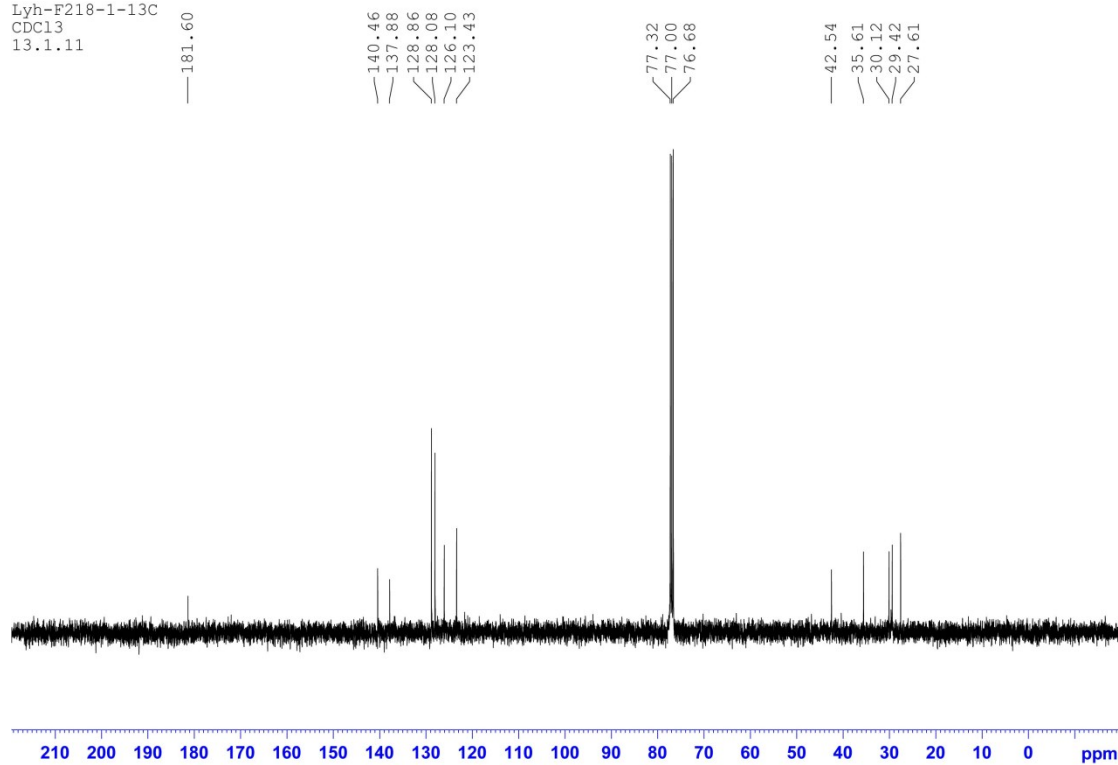

**(-)-3-(4-benzylidenecyclohexanecarbonyl)oxazolidin-2-one (3h)**

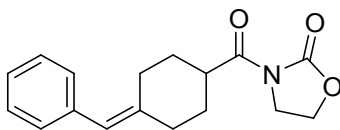

Lyh-F218B-1H  
 CDC13  
 13.1.11

7.323  
 7.304  
 7.286  
 7.255  
 7.198  
 7.191  
 7.187  
 7.178  
 6.290  
 4.418  
 4.398  
 4.378  
 4.027  
 4.006  
 3.987  
 3.781  
 3.773  
 3.765  
 3.753  
 3.744  
 3.736  
 3.724  
 3.716  
 3.708  
 2.960  
 2.926  
 2.466  
 2.432  
 2.380  
 2.372  
 2.348  
 2.340  
 2.316  
 2.306  
 2.081  
 2.048  
 2.030  
 2.015  
 1.990  
 1.984  
 1.951  
 1.719  
 1.708  
 1.688  
 1.677  
 1.658  
 1.648  
 1.627  
 1.616  
 1.607  
 1.597

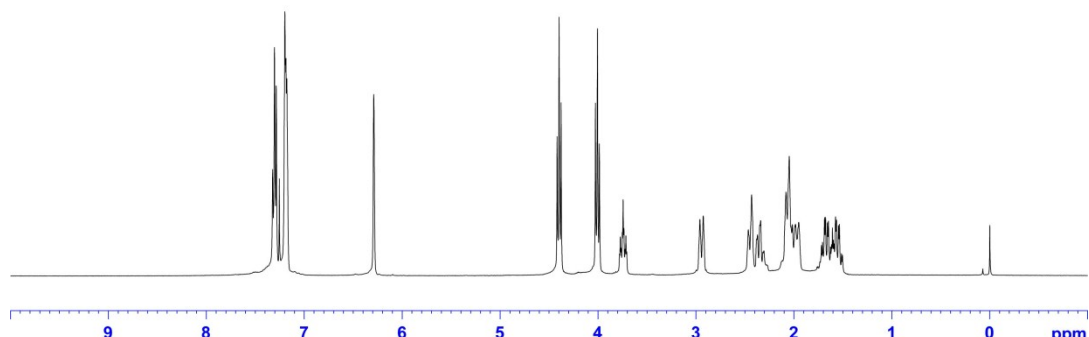

Lyh-F218B-13C  
 CDC13  
 13.1.11

175.91  
 153.20  
 140.63  
 137.93  
 128.87  
 128.04  
 126.03  
 123.29  
 77.32  
 77.00  
 76.69  
 61.91  
 42.75  
 41.71  
 35.80  
 30.37  
 29.67  
 27.79

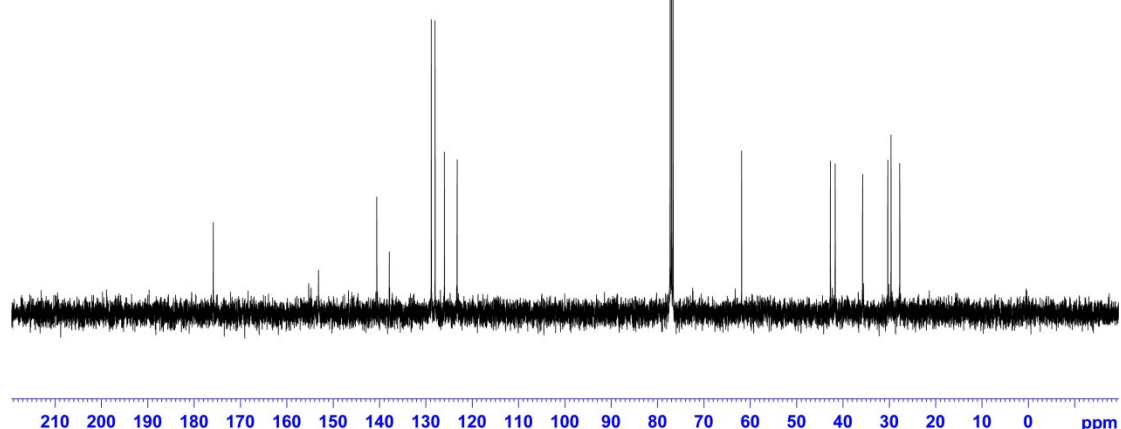

### 3-(4-benzylcyclohexanecarbonyl)oxazolidin-2-one (3i)

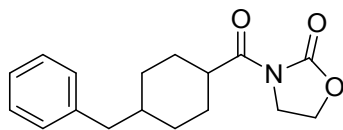

Lyh-F219-2-1H  
 CDCl<sub>3</sub>  
 13.5.01

7.285  
 7.267  
 7.254  
 7.248  
 7.190  
 7.172  
 7.166  
 7.156  
 7.139  
 7.117  
 4.403  
 4.383  
 4.363  
 4.030  
 4.010  
 3.990  
 3.660  
 3.648  
 3.641  
 3.630  
 3.620  
 3.611  
 3.600  
 2.628  
 2.609  
 1.897  
 1.886  
 1.875  
 1.864  
 1.854  
 1.843  
 1.833  
 1.823  
 1.813  
 1.772  
 1.676  
 1.665  
 1.656  
 1.646  
 1.634  
 1.619  
 1.611  
 1.603  
 1.587  
 1.576  
 1.565  
 1.554  
 1.532

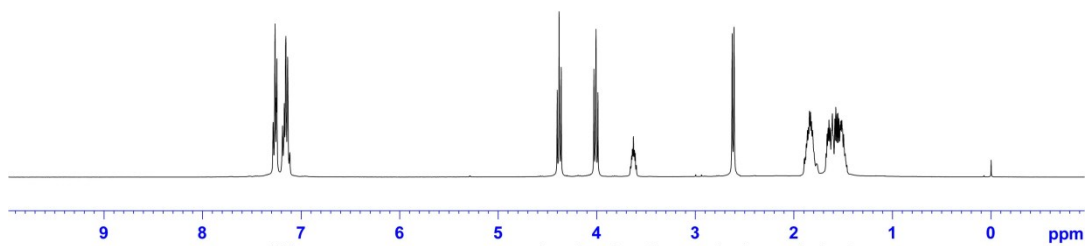

Lyh-F219-2-13C  
 CDCl<sub>3</sub>  
 13.5.01

176.59  
 153.11  
 141.31  
 129.00  
 128.13  
 125.65  
 77.32  
 77.00  
 76.68  
 61.81  
 42.77  
 40.14  
 39.81  
 36.41  
 28.57  
 25.21

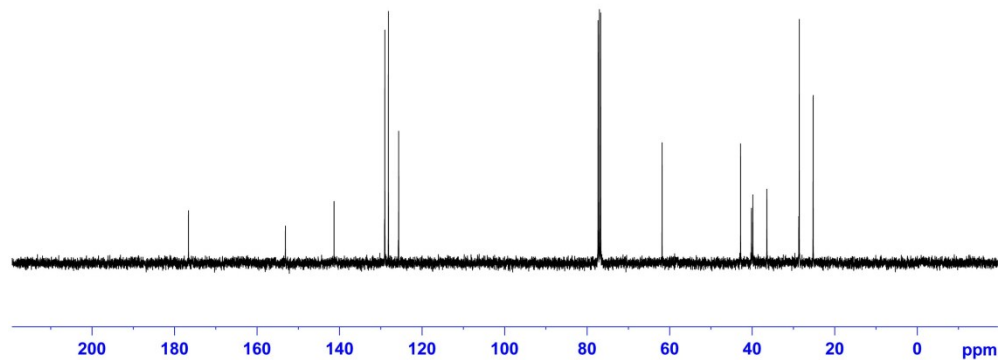

# Biphenyl-3-yl-carbonyl oxazolidin-2-one (3k)

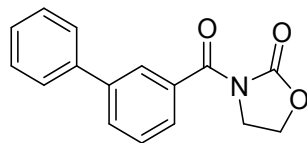

Lyh-F132-1H  
CD3OD  
12.04.11

7.867  
7.781  
7.766  
7.609  
7.592  
7.522  
7.505  
7.482  
7.443  
7.375  
7.362

4.524  
4.519  
4.203  
4.186

3.345

0.000

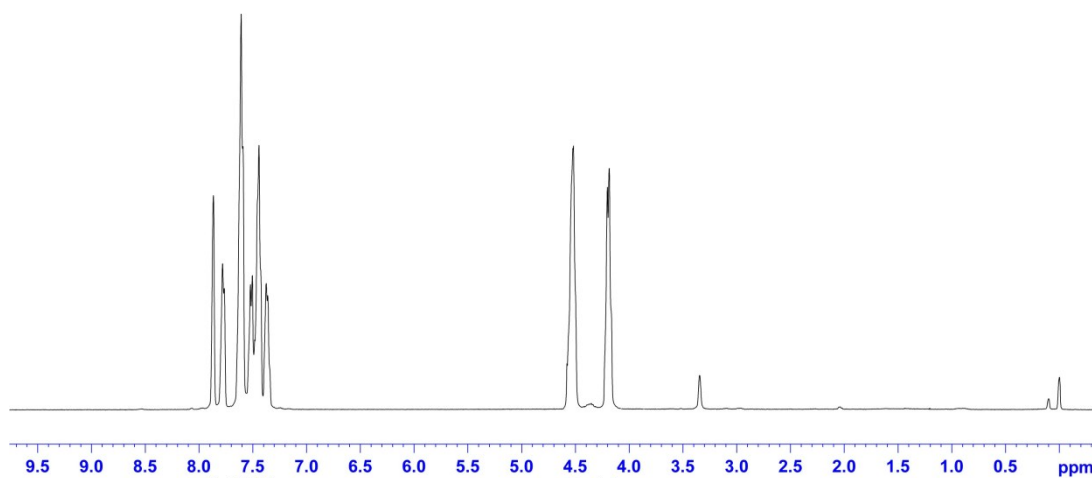

Lyh-F132-13C  
CD3OD  
12.04.11

1.00  
1.07  
3.19  
1.04  
2.20  
1.04  
170.05  
153.87  
140.94  
140.03  
133.29  
130.80  
130.73  
128.76  
128.29  
127.62  
127.60  
127.04

2.33  
2.15

62.66  
48.97  
48.86  
48.64  
48.43  
48.22  
48.01  
47.87  
43.76

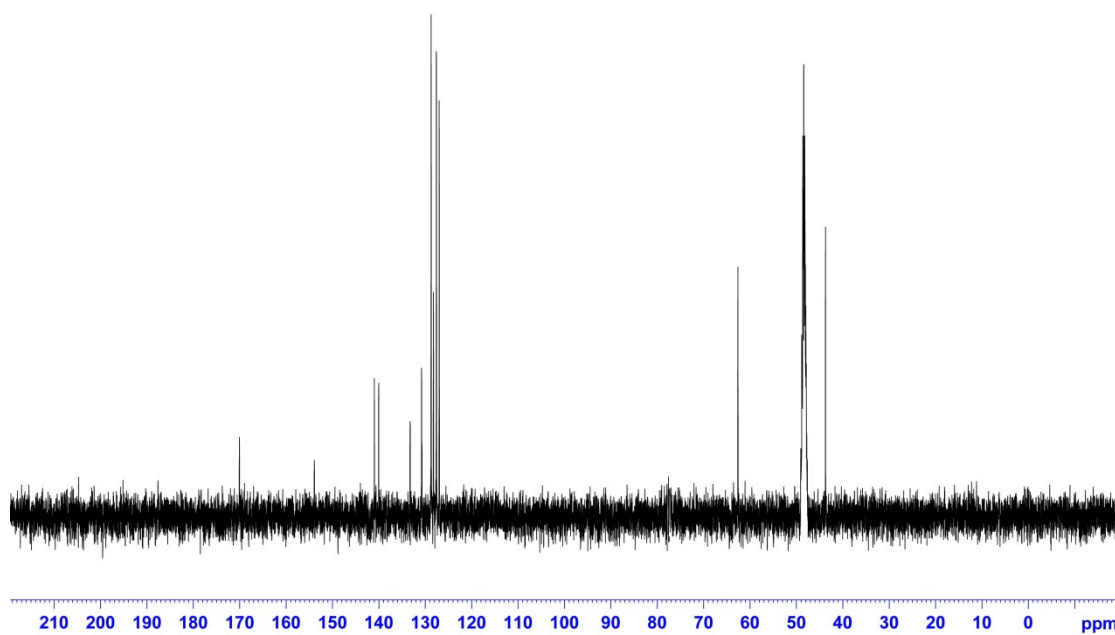

# Biphenyl-3-yl-methylcarbonyl oxazolidin-2-one (31)

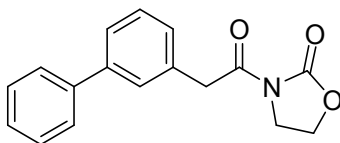

Lyh-F133-1H  
CDC13  
12.05.11

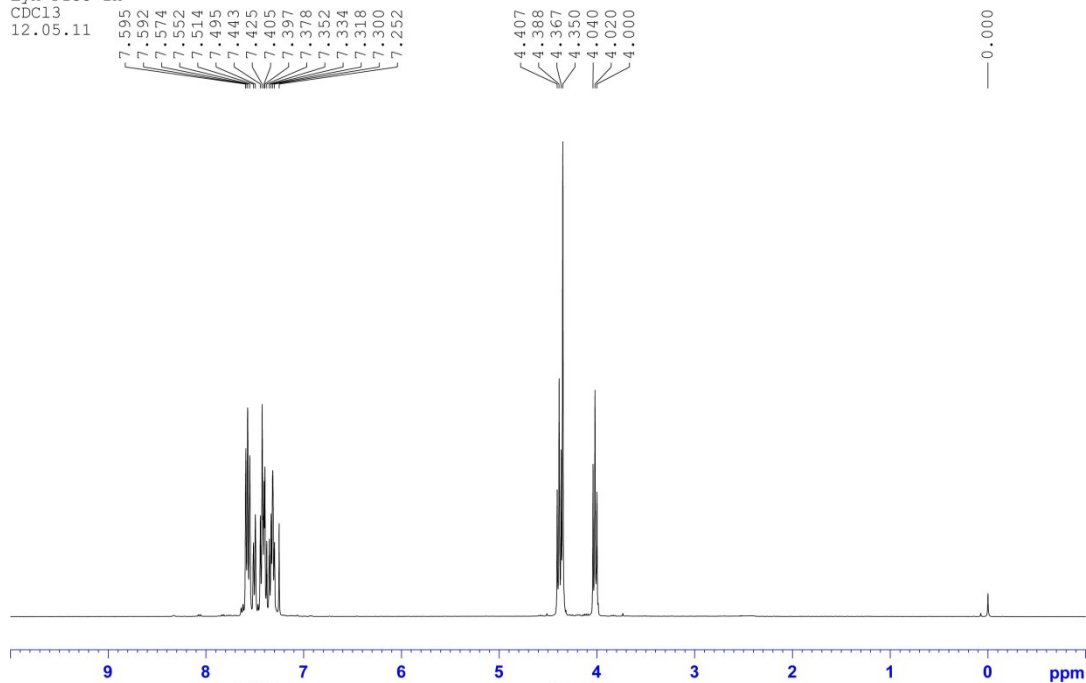

Lyh-F133-13C  
CDC13  
12.05.11

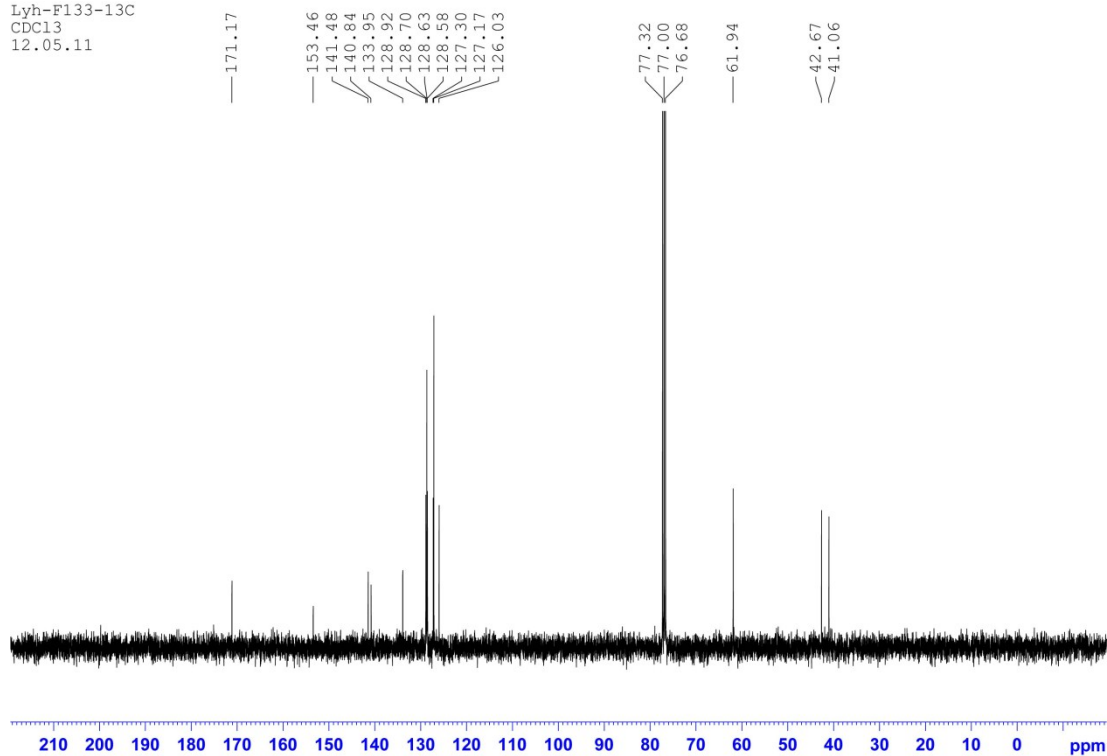

# Biphenyl-4-yl-methylcarbonyl oxazolidin-2-one (3m)

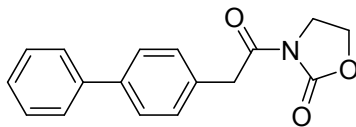

Lyh-F100-1H  
CDC13  
12.03.24

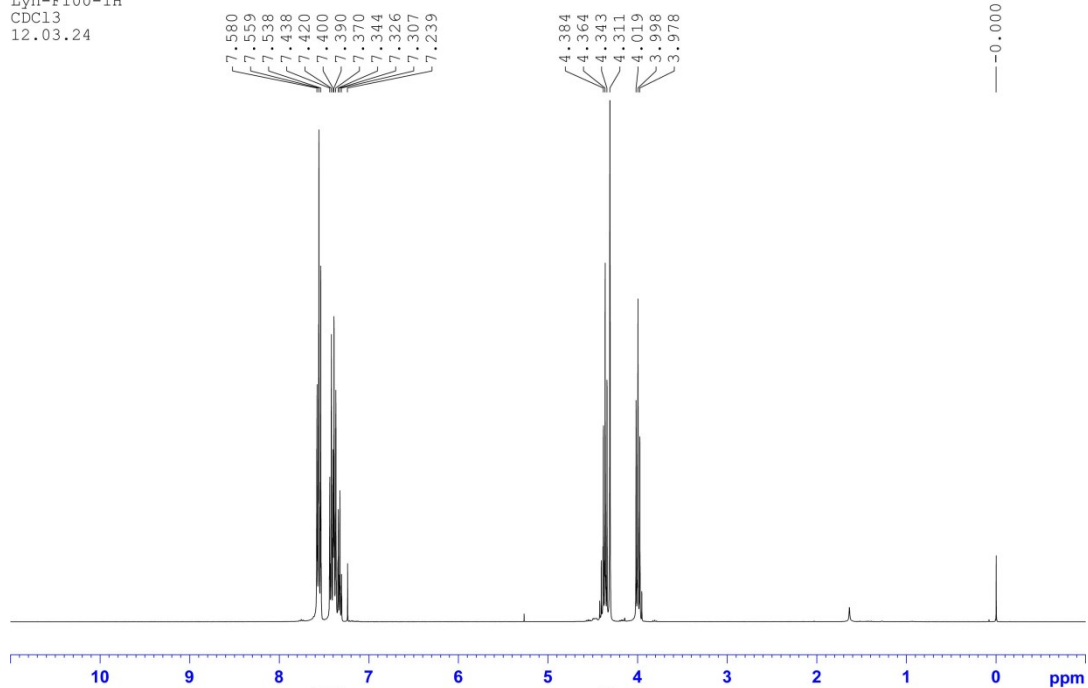

Lyh-F100-13C  
CDC13  
12.03.24

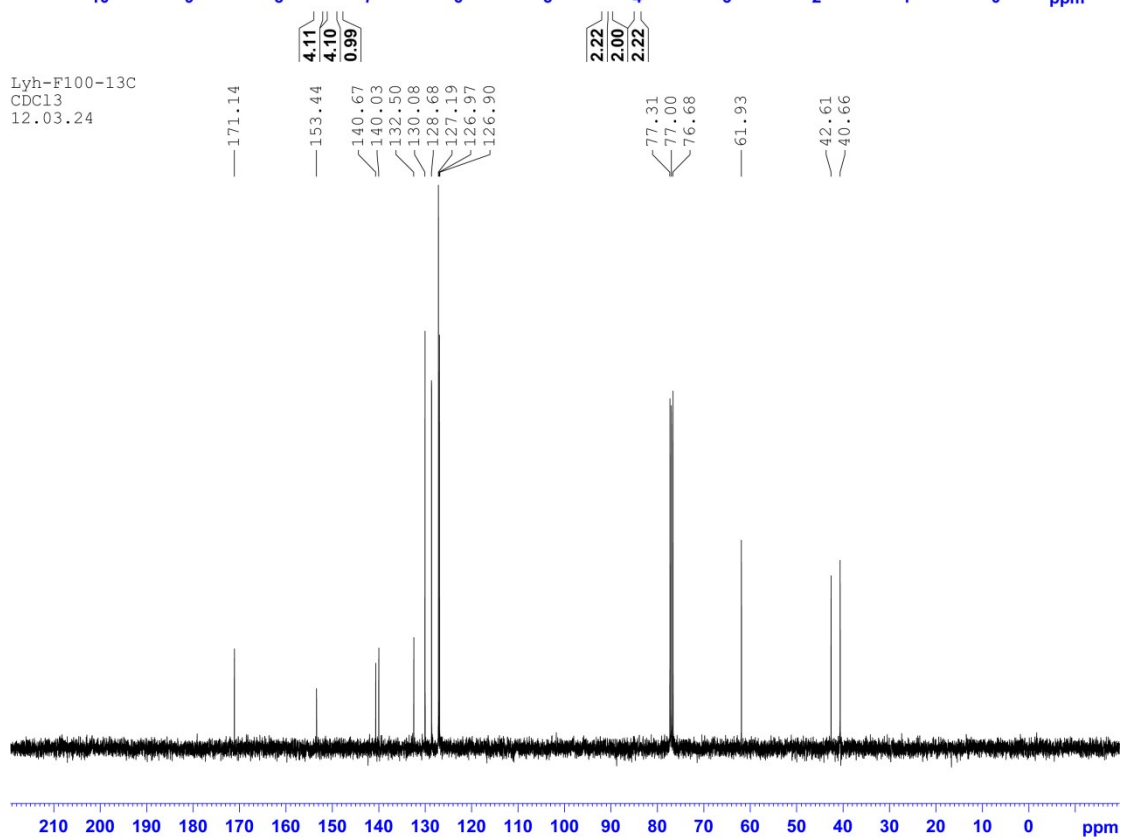

### 3-(3-phenoxybenzoyl)oxazolidin-2-one (3n)

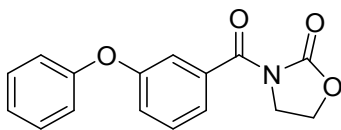

Lyh-F144-1H  
CDC13  
12.05.1

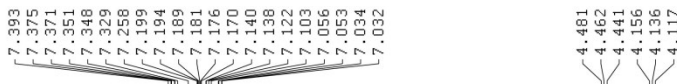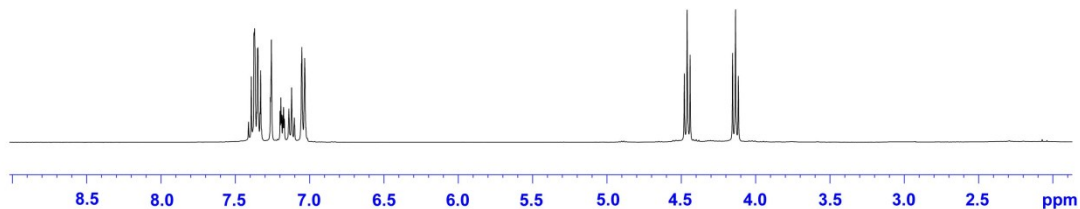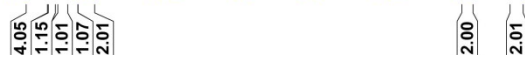

Lyh-F144-13C  
CDC13  
12.05.1

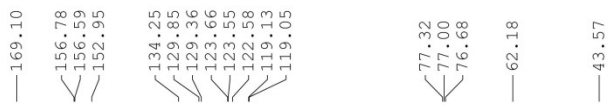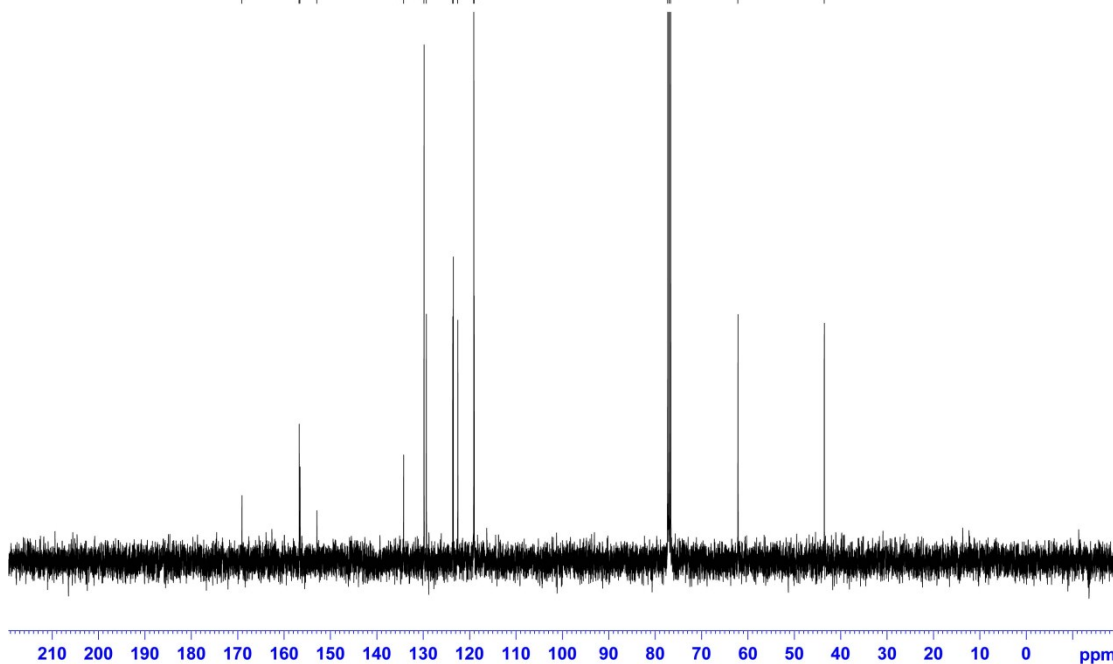



### 3-(2-(3-phenoxyphenyl)acetyl)oxazolidin-2-one (3o)

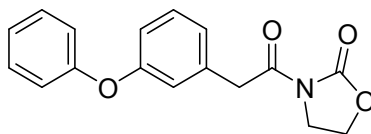

Lyh-F163-1H  
 CDC13  
 12.08.11

7.341  
 7.321  
 7.302  
 7.286  
 7.266  
 7.247  
 7.109  
 7.090  
 7.072  
 7.035  
 7.014  
 6.993  
 6.963  
 6.908  
 6.902  
 6.888  
 6.882

4.386  
 4.367  
 4.346  
 4.240  
 4.007  
 3.967  
 3.967

0.000

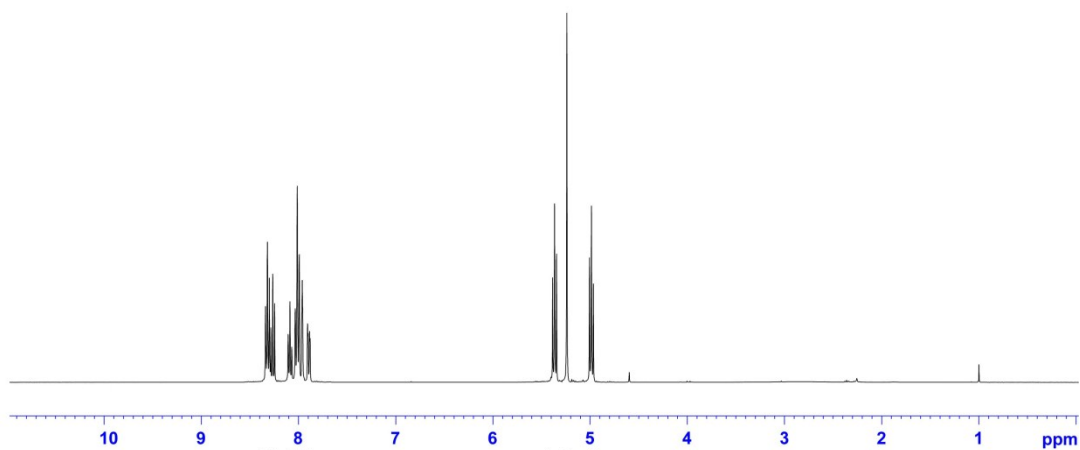

Lyh-F163-13C  
 CDC13  
 12.08.11

170.80  
 157.27  
 156.91  
 153.39  
 129.74  
 129.74  
 129.67  
 124.49  
 123.24  
 120.10  
 118.90  
 117.37

77.32  
 77.00  
 76.68

61.94

42.57  
 40.89

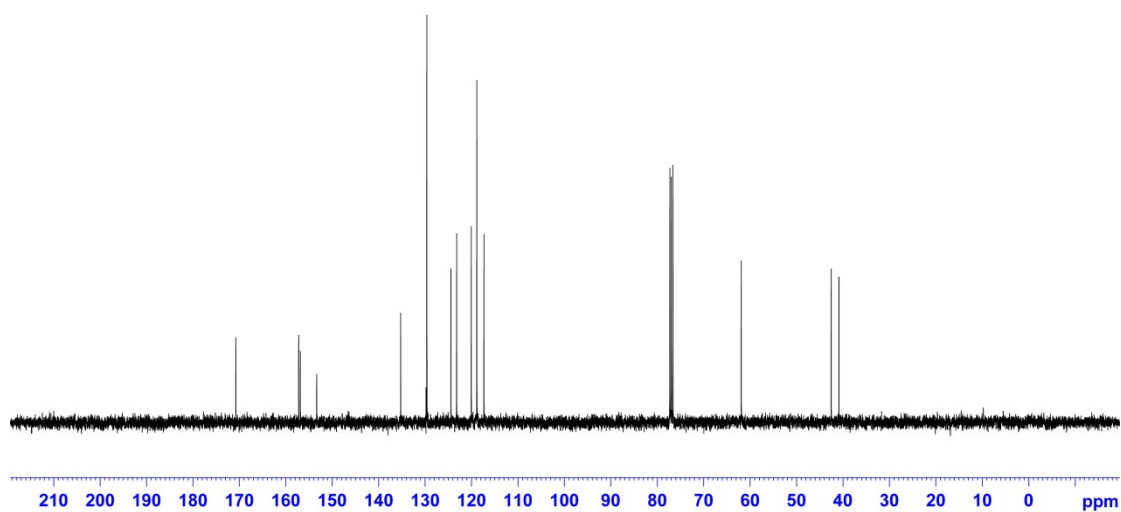

### 3-(2-(3-phenoxyphenyl)acetyl)oxazolidin-2-one (3p)

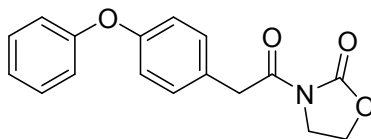

Lyh-F140-1-1H  
CDC13  
12.06.18

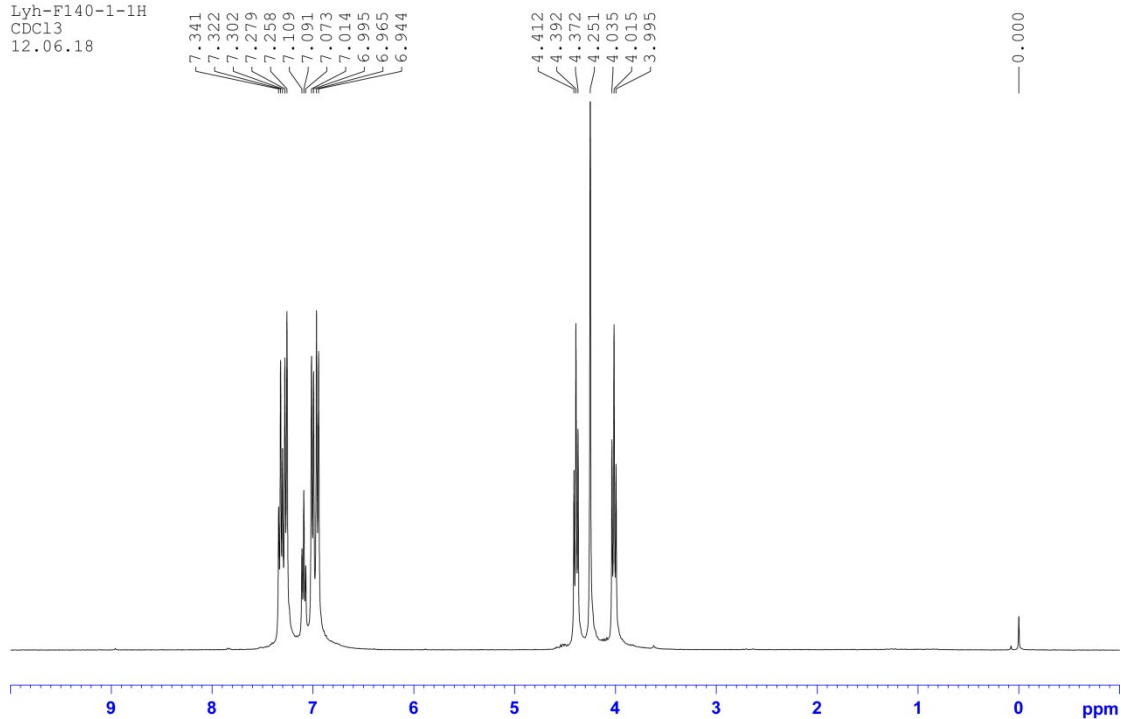

Lyh-F140-1-13C  
CDC13  
12.06.18

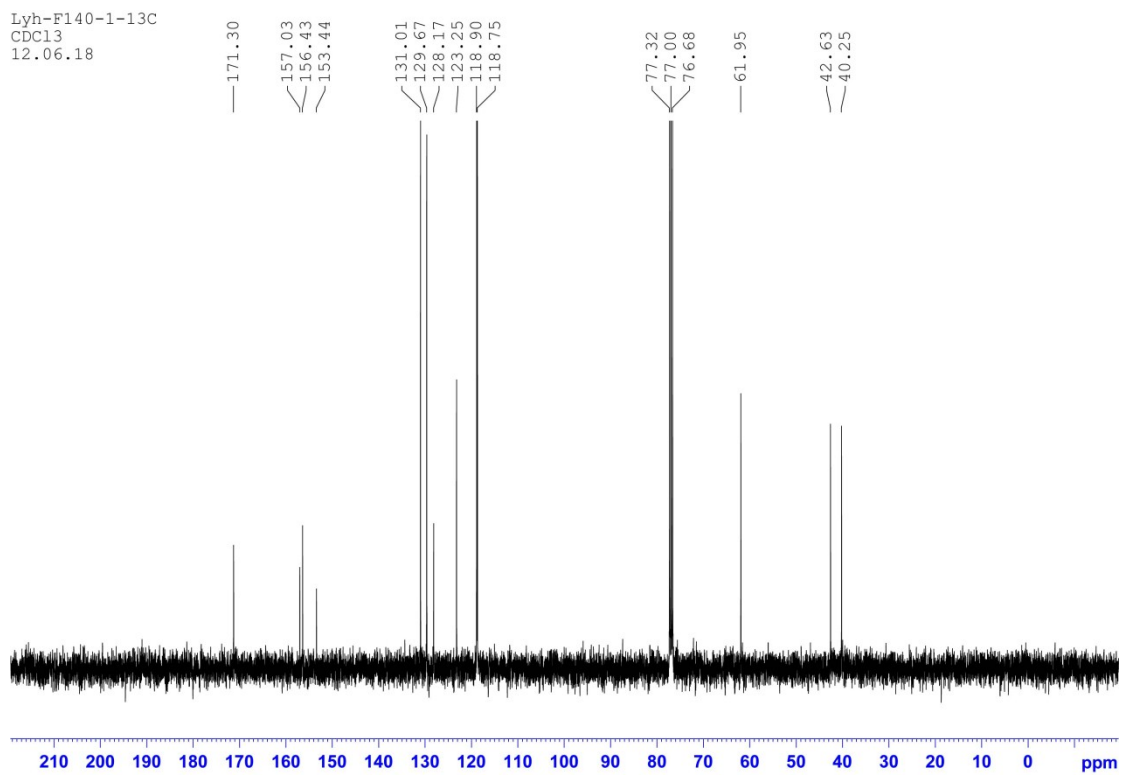

### 3-(benzyloxy)benzoic acid (3q-1)

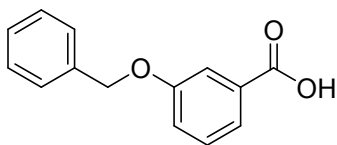

Lyh-F150-1H  
CDC13  
12.05.11

7.744  
7.726  
7.457  
7.439  
7.414  
7.396  
7.376  
7.356  
7.334  
7.235  
7.228  
7.213  
7.208

5.113

0.000

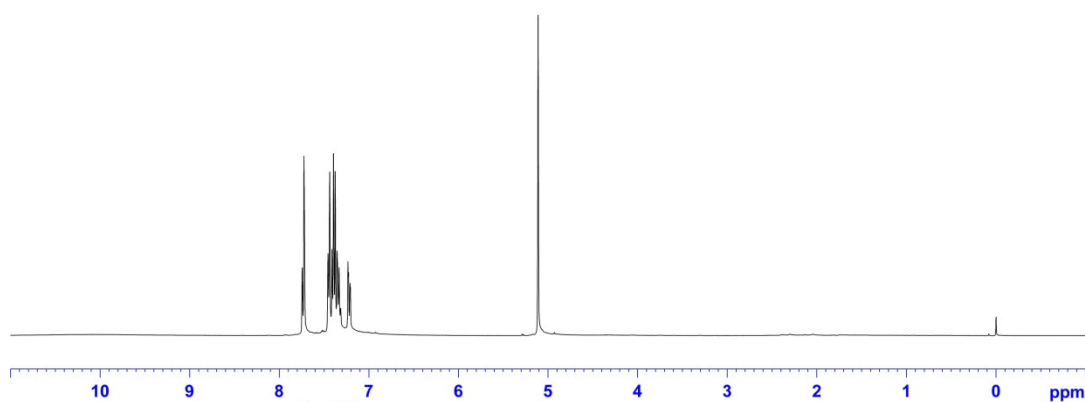

Lyh-F150-13C  
CDC13  
12.05.11

172.083

158.755

2.27

2.07

3.04

1.41

1.41

2.00

136.438

130.621

129.570

128.626

128.119

127.538

122.927

121.186

115.491

77.315

76.998

76.680

70.183

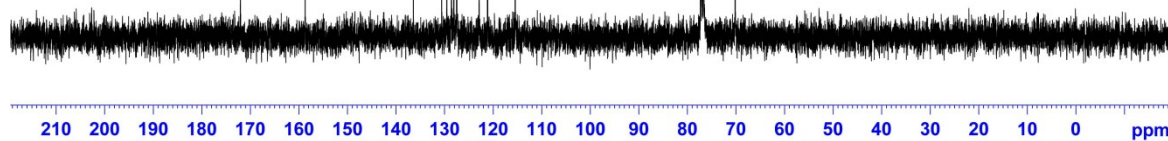

### 3-(3-(benzyloxy)benzoyl)oxazolidin-2-one (3q)

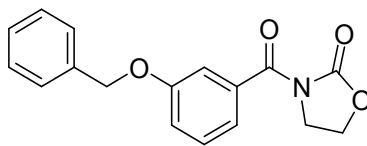

Lyh-F146-1H  
CDC13  
12.05.17

7.439  
7.421  
7.405  
7.387  
7.368  
7.360  
7.340  
7.329  
7.321  
7.261  
7.242  
7.160  
7.141  
7.137

5.078  
4.498  
4.479  
4.460  
4.175  
4.156  
4.136

0.000

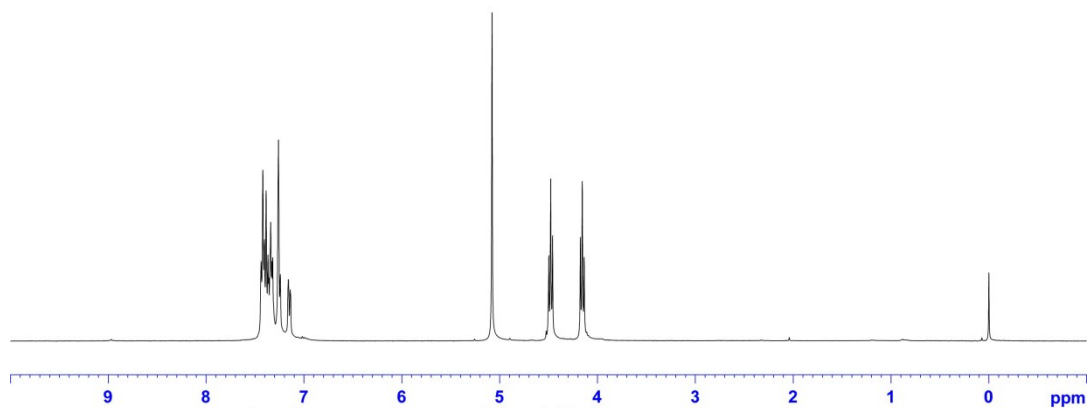

9.10

2.05

2.06

2.00

Lyh-F146-13C  
CDC13  
12.05.17

169.51  
158.33  
153.06

136.54  
133.86  
128.98  
128.59  
128.06  
127.55  
121.72  
119.29  
115.08

77.31  
77.00  
76.68  
70.25  
62.21

43.72

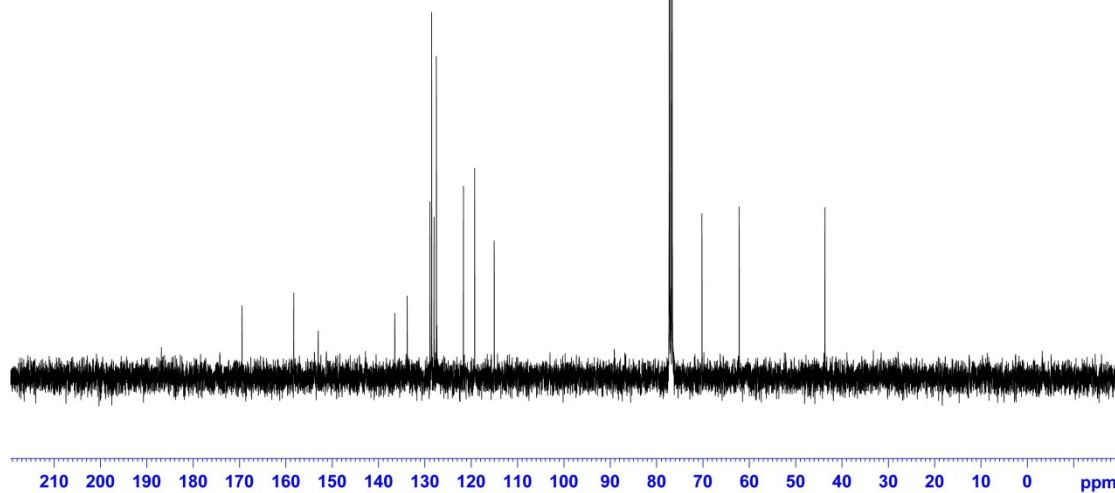

### 3-(2-(3-(benzyloxy)phenyl)acetyl)oxazolidin-2-one (3r)

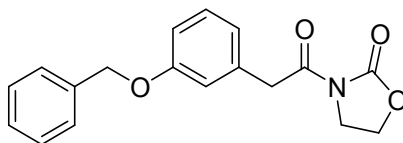

Lyh-F162-1H  
CDC13  
12.08.1

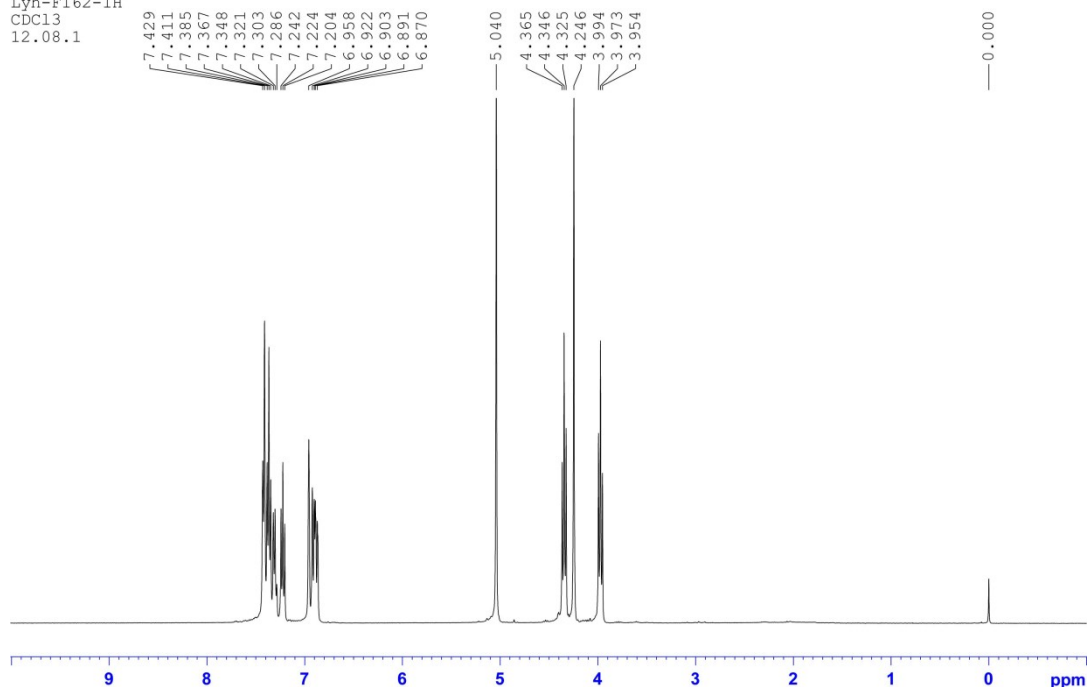

Lyh-F162-13C  
CDC13  
12.08.1

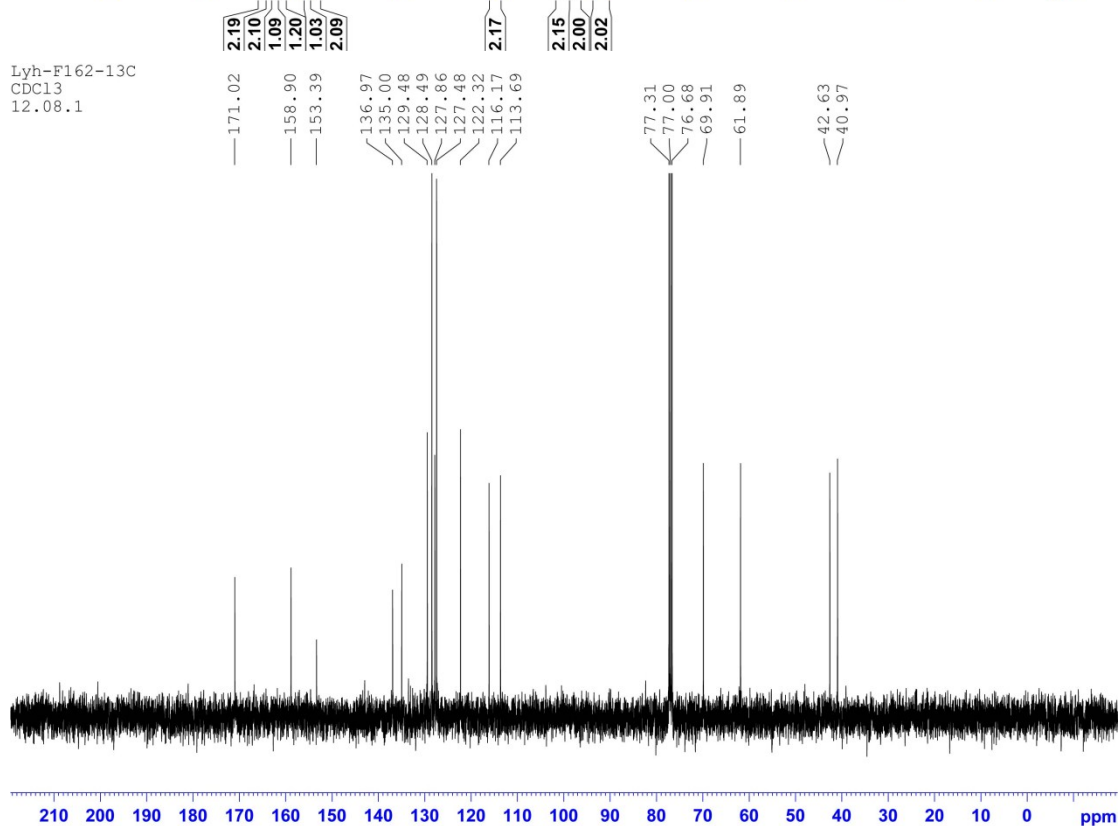

# 2-(4-(benzyloxy)phenyl)acetic acid (3s-1)

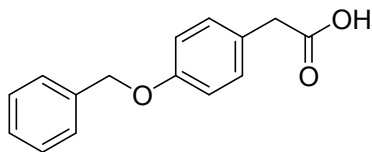

Lyh-F151-1H  
CDC13  
12.06.05

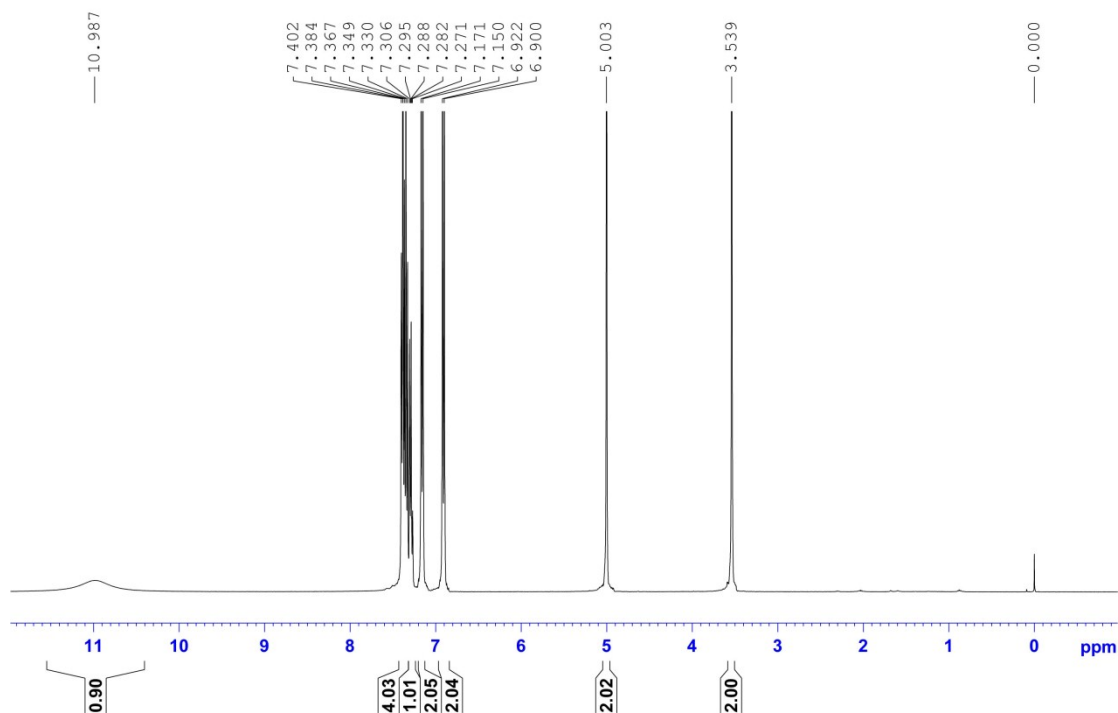

Lyh-F151-13C  
CDC13  
12.06.05

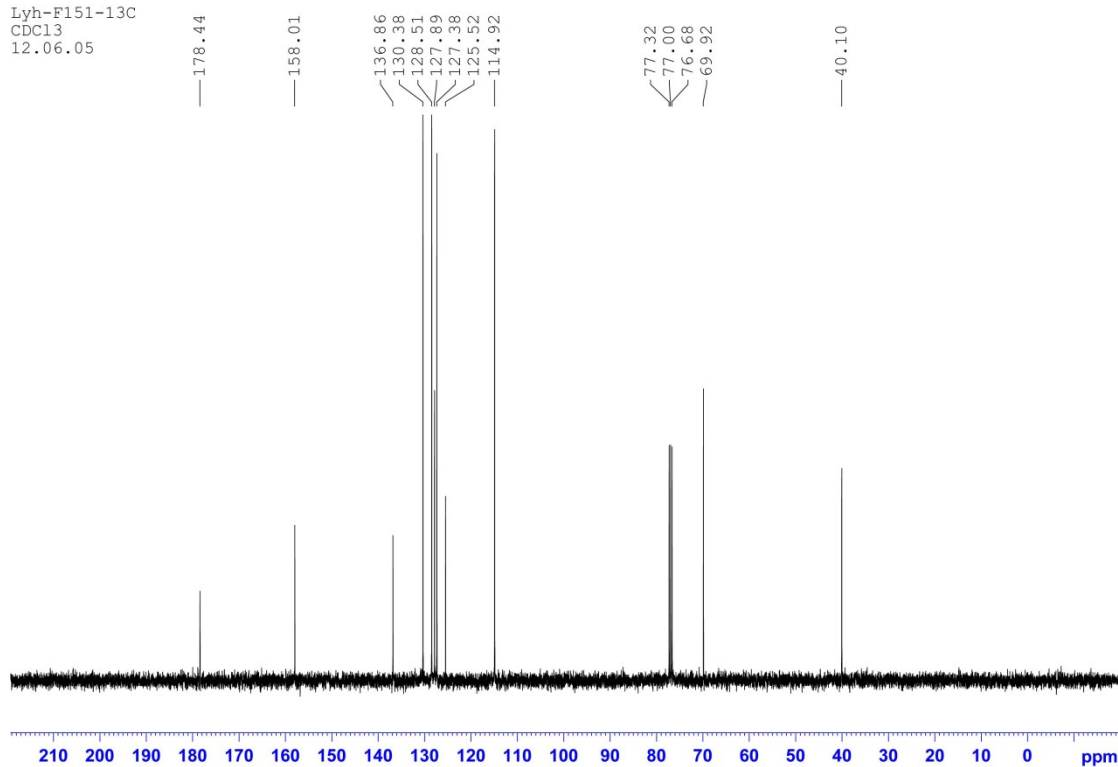

**3-(2-(4-(benzyloxy)phenyl)acetyl)oxazolidin-2-one (3s)**

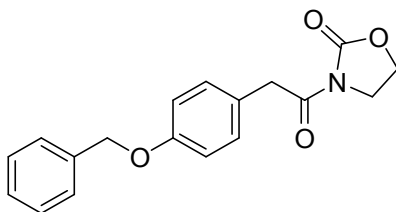

Lyh-F147-1H  
 CDC13  
 12.06.18

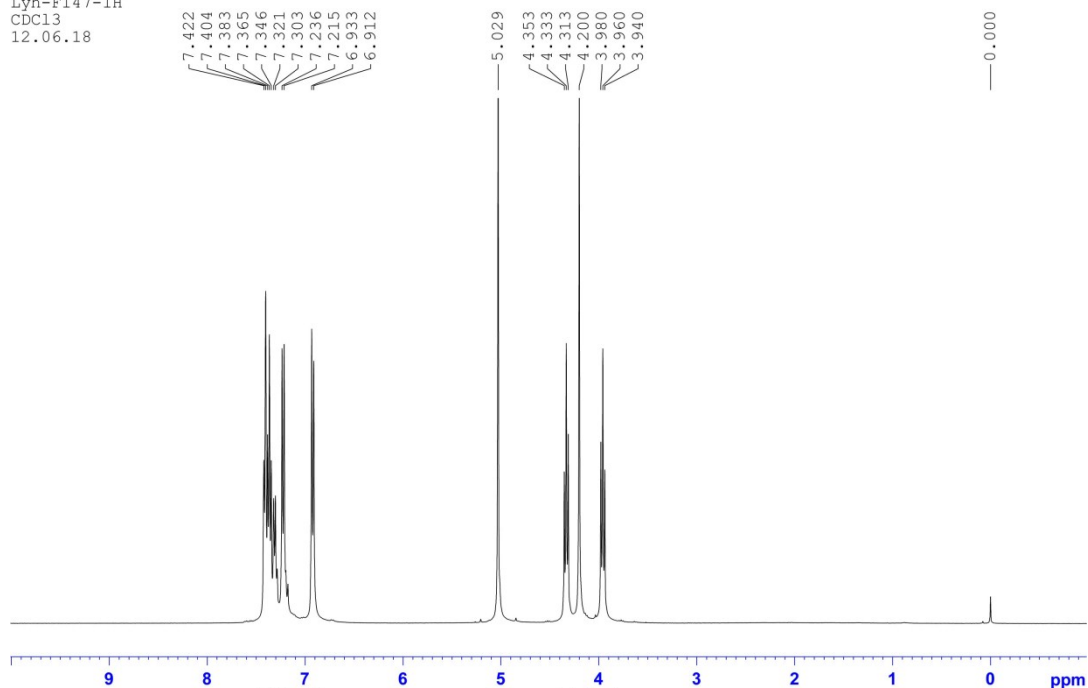

Lyh-F147-13C  
 CDC13  
 12.06.18

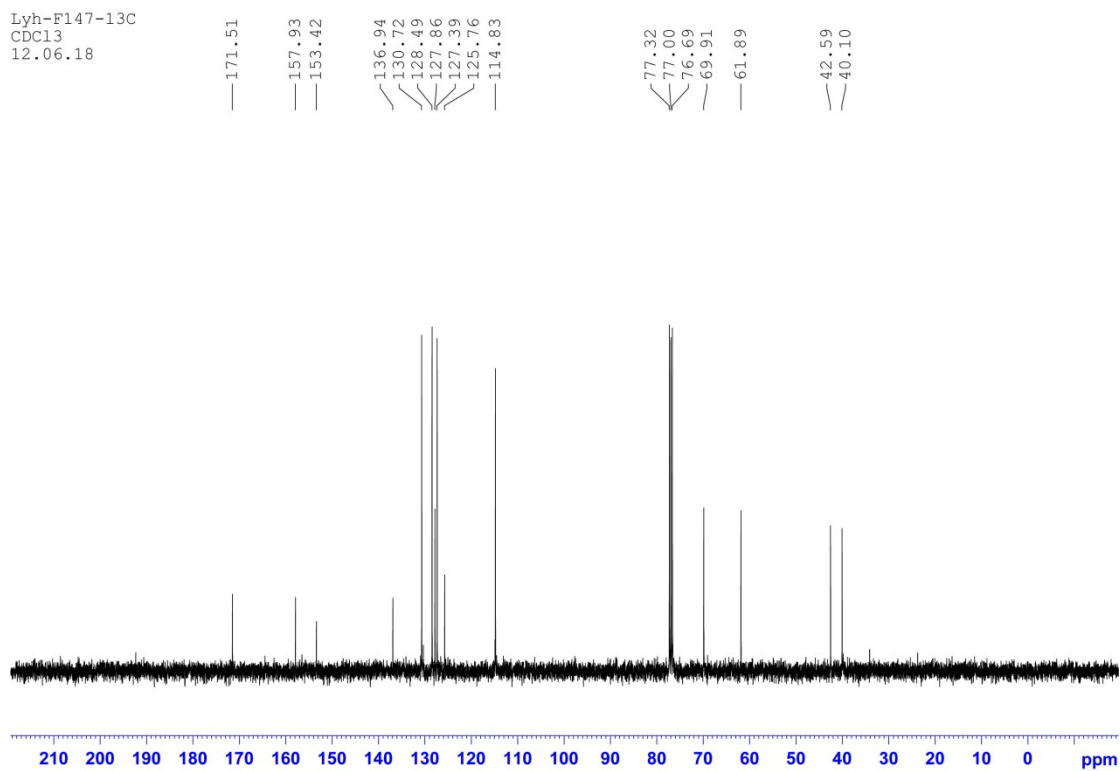

## References

- (1) Li, B. J.; Wang, H. Y.; Zhu, Q. L.; Shi, Z. J., Rhodium/copper-catalyzed annulation of benzimides with internal alkynes: indenone synthesis through sequential C-H and C-N cleavage. *Angewandte Chemie* **2012**, 51 (16), 3948.
- (2) Evans, D. A.; Nelson, S. G., Chiral Magnesium Bis(sulfonamide) Complexes as Catalysts for the Merged Enolization and Enantioselective Amination of N-Acyloxazolidinones. A Catalytic Approach to the Synthesis of Arylglycines. *Journal of the American Chemical Society* **1997**, 119 (27), 6452.
- (3) Wang, J.; Uttamchandani, M.; Li, J.; Hu, M.; Yao, S. Q., Rapid assembly of matrix metalloprotease inhibitors using click chemistry. *Organic letters* **2006**, 8 (17), 3821.
- (4) Iwasaki, T.; Higashikawa, K.; Reddy, V. P.; Ho, W. W.; Fujimoto, Y.; Fukase, K.; Terao, J.; Kuniyasu, H.; Kambe, N., Nickel-butadiene catalytic system for the cross-coupling of bromoalkanoic acids with alkyl Grignard reagents: a practical and versatile method for preparing fatty acids. *Chemistry* **2013**, 19 (9), 2956.
- (5) Lemieux, R. P.; Schuster, G. B., Photochemistry of axially chiral (arylmethylene)cycloalkanes: a search for suitable photoswitchable liquid crystalline materials. *The Journal of Organic Chemistry* **1993**, 58 (1), 100.
